# Supplementary material for: Transition-metal- and oxidant-free directed anodic C–H sulfonylation of N,N-disubstituted anilines with sulfinates
Source: Royal Society of Chemistry journal article supplement (doi:10.1039/c9cc03789f), 2019-01-01

## Supporting Information

# Transition-Metal- and Oxidant-Free Directed Anodic C-H Sulfonylation of *N,N*-Disubstituted Anilines with Sulfinates

Yan-Chen Wu,<sup>a</sup> Shuai-Shuai Jiang,<sup>a</sup> Shu-Zheng Luo,<sup>a</sup> Ren-Jie Song,<sup>\*a</sup> and Jin-Heng Li<sup>\*,ab</sup>

<sup>a</sup>. Key Laboratory of Jiangxi Province for Persistent Pollutants Control and Resources Recycle, Nanchang Hangkong University, Nanchang 330063, China

<sup>b</sup>. State Key Laboratory of Chemo/Biosensing and Chemometrics, Hunan University, Changsha 410082, China

E-mail: [srj0731@hnu.edu.cn](mailto:srj0731@hnu.edu.cn) and [jhli@hnu.edu.cn](mailto:jhli@hnu.edu.cn)

### List of Contents

|                                                                         |                |
|-------------------------------------------------------------------------|----------------|
| <b>(A) Typical experimental procedure</b>                               | <b>S2-S8</b>   |
| <b>(B) Analytical data</b>                                              | <b>S9-S25</b>  |
| <b>(C) Spectra</b>                                                      | <b>S26-S63</b> |
| <b>(D) The X-ray single-crystal diffraction analysis of 3aa and 3na</b> | <b>S64</b>     |

---

## (A) Typical experimental procedure

### (a) General Procedure for the electrochemical C-H sulfonylation of 4-Methoxy-*N,N*-dimethylaniline(1a):

#### *N,N*-dimethylaniline(1a):

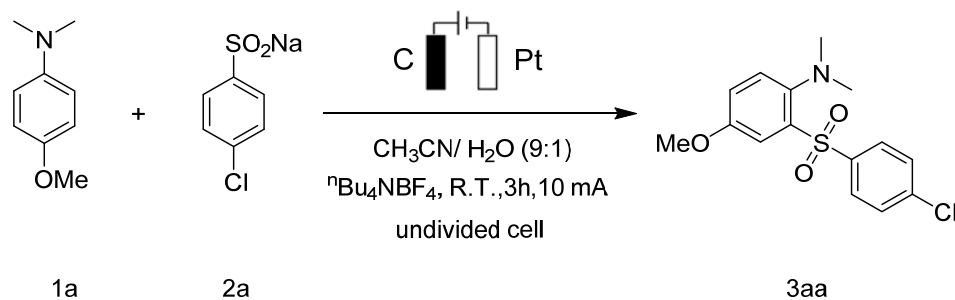

To an oven-dried undivided three-necked bottle (10mL) were added substrates **1a** aniline (0.3 mmol), Sodium sulfinate (4 equiv), *n*Bu<sub>4</sub>NBF<sub>4</sub> (0.1mmol) and CH<sub>3</sub>CN/H<sub>2</sub>O (9 mL/1 mL), The bottle was equipped graphite rod(ϕ 6 mm, about 18 mm immersion depth in solution) as the anode and pt plate (10 mm×10mm×1 mm) as the cathode. The reaction mixture was stirred and electrolyzed at a constant current of 10 mA under room temperature for 3h (Figure S1). and stopped until complete consumption of aniline (monitored by TLC). After the reaction was finished, diluted with ethyl acetate (10 mL), and washed with H<sub>2</sub>O, extracted with ethyl acetate (3×5 mL). The combined organic phases were dried over anhydrous Na<sub>2</sub>SO<sub>4</sub> and concentrated, and the resulting residue was purified by silica gel column chromatography (hexane/ethyl acetate = 10:1) to afford the desired product **3aa**(88.7mg, 91%).

(b) Typical Experimental Procedure for the electrochemical C-H sulfonylation of 4-Methoxy-*N,N*-dimethylaniline(**1a**) with sodium 4-chlorobenzenesulfinate (**2a**)

up to 1 g Scale:

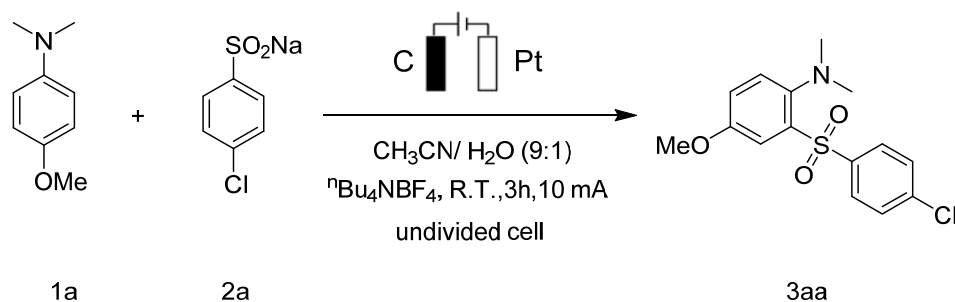

To an oven-dried undivided three-necked bottle (25mL) were added substrates **1a** 4-Methoxy-*N,N*-dimethylaniline (6.6 mmol), 4-chlorobenzenesulfinate (4 equiv) ,  $n\text{Bu}_4\text{NBF}_4$  (0.3mmol) and  $\text{CH}_3\text{CN}/\text{H}_2\text{O}$  (18 mL/2 mL), The bottle was equipped graphite rod( $\phi$  6 mm, about 18 mm immersion depth in solution) as the anode and pt plate (10 mm $\times$ 10mm $\times$ 1 mm) as the cathode. The reaction mixture was stirred and electrolyzed at a constant current of 10 mA under room temperature for 18 h, and we stopped the reaction. When we prolong reaction time, the aniline cannot be completed consumption (monitored by TLC). After the reaction was finished, diluted with ethyl acetate (20 mL), and washed with  $\text{H}_2\text{O}$ , extracted with ethyl acetate (3 $\times$ 20 mL). The combined organic phases were dried over anhydrous  $\text{Na}_2\text{SO}_4$  and concentrated, and the resulting residue was purified by silica gel column chromatography (hexane/ethyl acetate = 10:1) to afford the desired product **3aa**(1.64g, 71%).

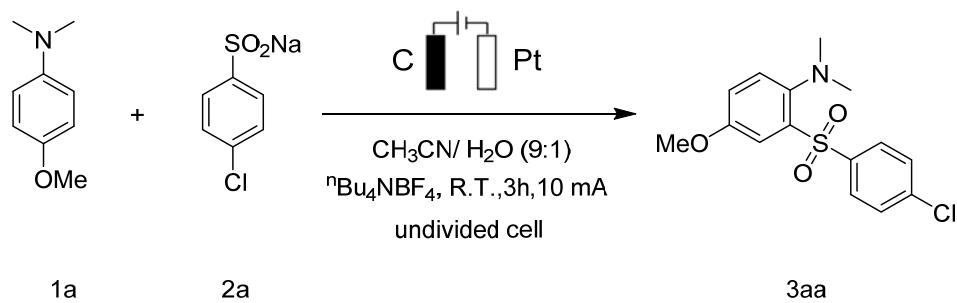

Table S1 Screening of optimal reaction conditions<sup>a</sup>

| Entry | <b>1a</b> | <b>2a</b> | Electrolyte                   | Solvent                                        | I (mA) | Yield(%) |
|-------|-----------|-----------|-------------------------------|------------------------------------------------|--------|----------|
| 1     | 0.3mmol   | 1.5equiv  | ${}^n\text{Bu}_4\text{NBF}_4$ | $\text{CH}_3\text{CN}:\text{H}_2\text{O}(9:1)$ | 10     | 54       |
| 2     | 0.3mmol   | 2equiv    | ${}^n\text{Bu}_4\text{NBF}_4$ | $\text{CH}_3\text{CN}:\text{H}_2\text{O}(9:1)$ | 10     | 66       |
| 3     | 0.3mmol   | 3equiv    | ${}^n\text{Bu}_4\text{NBF}_4$ | $\text{CH}_3\text{CN}:\text{H}_2\text{O}(9:1)$ | 10     | 82       |
| 4     | 0.3mmol   | 4equiv    | ${}^n\text{Bu}_4\text{NBF}_4$ | $\text{CH}_3\text{CN}:\text{H}_2\text{O}(9:1)$ | 10     | 91       |

<sup>a</sup> Reaction conditions: carbon rod anode, platinum plate cathode, constant current = 10 mA, **1a** (0.3 mmol),  ${}^n\text{Bu}_4\text{NBF}_4$  (0.1 mmol),  $\text{CH}_3\text{CN}/\text{H}_2\text{O}$  (9.0 mL/1.0 mL), room temperature under air atmosphere for 3 h.

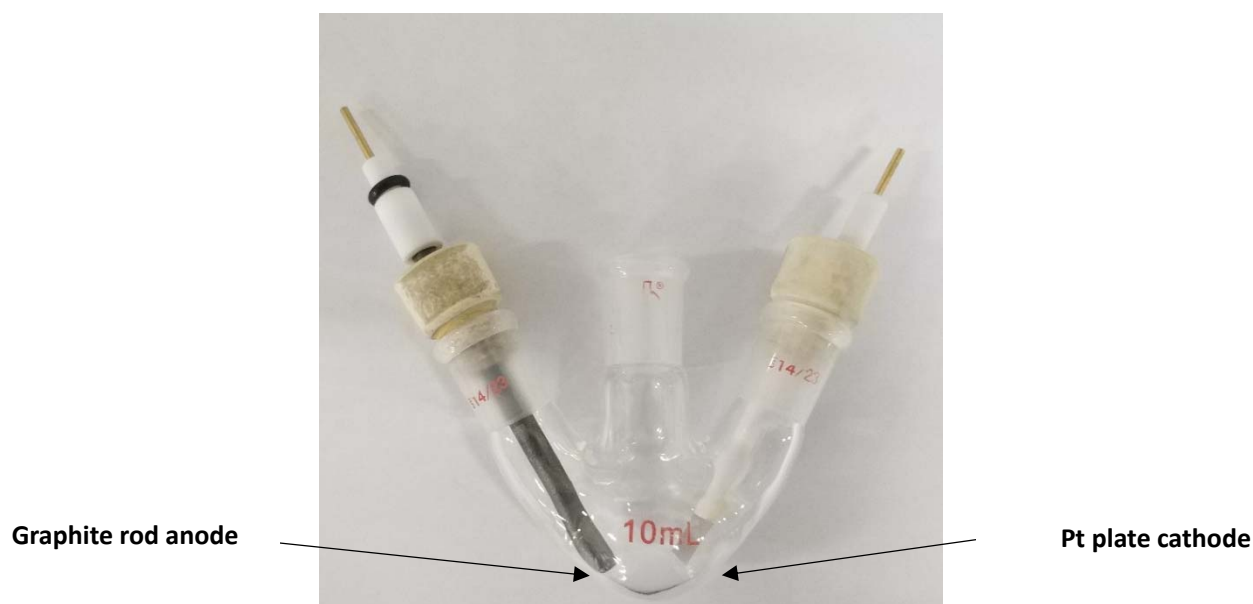

**Figure S1.** Undivided cell for current controlled electrolysis

**Procedure for cyclic voltammetry (CV):** Cyclic voltammetry was performed in a three-electrode cell connected to a schlenk line under nitrogen at room temperature. The working electrode was a steady glassy carbon disk electrode while the counter electrode was a platinum plate. The reference was an Ag/AgCl electrode submerged in saturated aqueous KCl solution, and separated from reaction by a salt bridge. 10 mL solvent containing 0.1 M  ${}^n\text{Bu}_4\text{NBF}_4$  were poured into the electrochemical cell in cyclic voltammetry experiments. The CV of all substrates were measured at the concentration of 0.01M. The scan rate was 0.05 V/s, ranging from 0 V to 3.0 V.

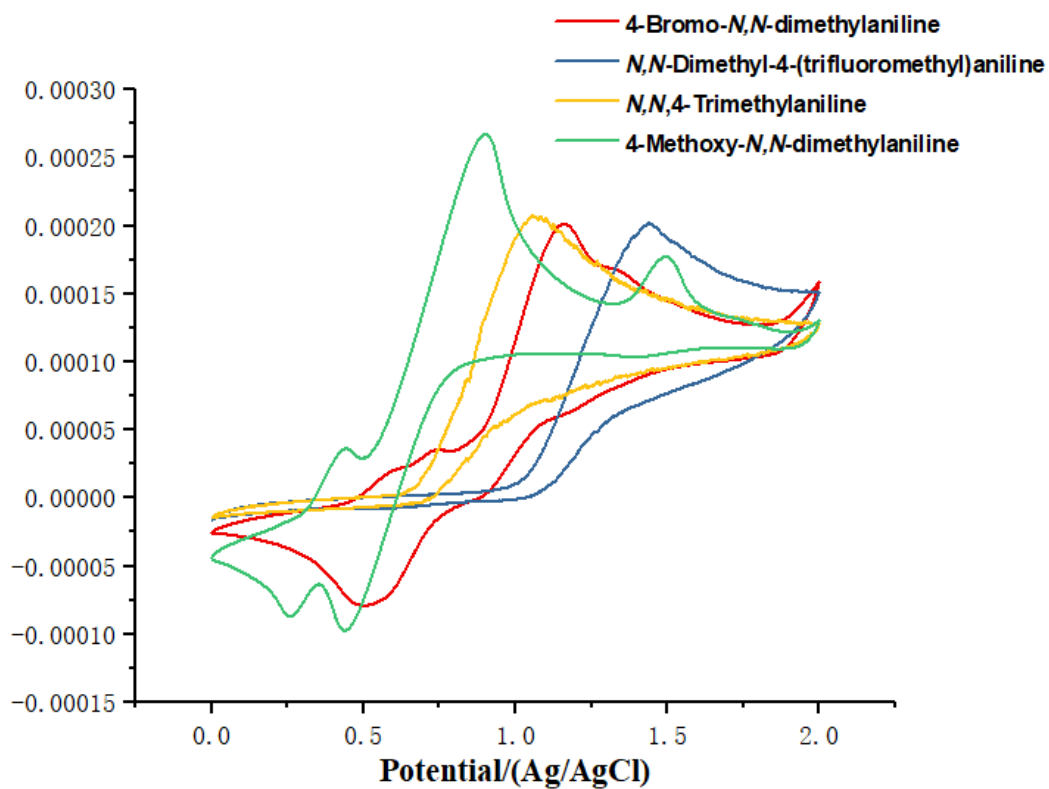

**Figure S2.** Study of the aniline oxidation potential during electrolysis

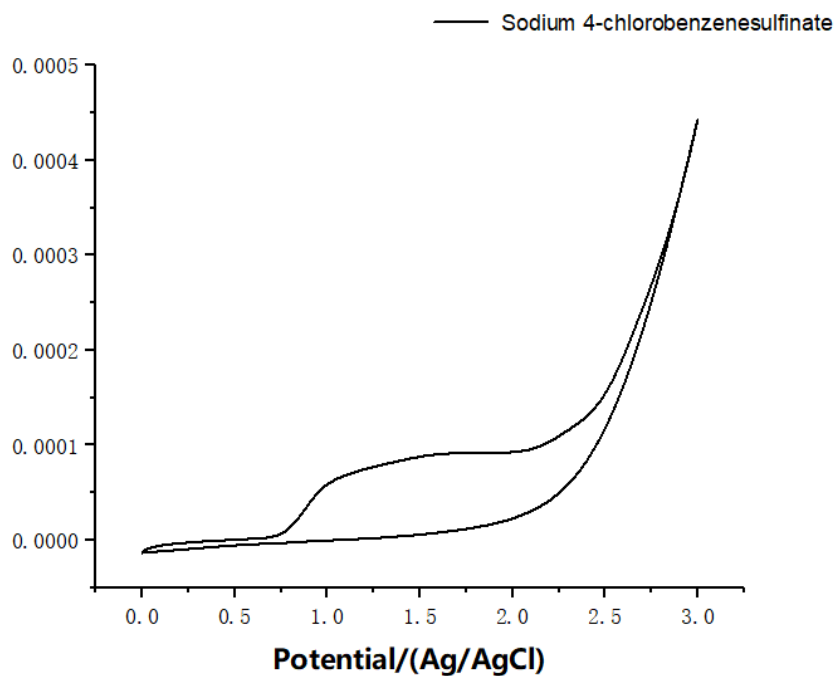

**Figure S3.** Study of the sodium sulfinate oxidation potential during electrolysis

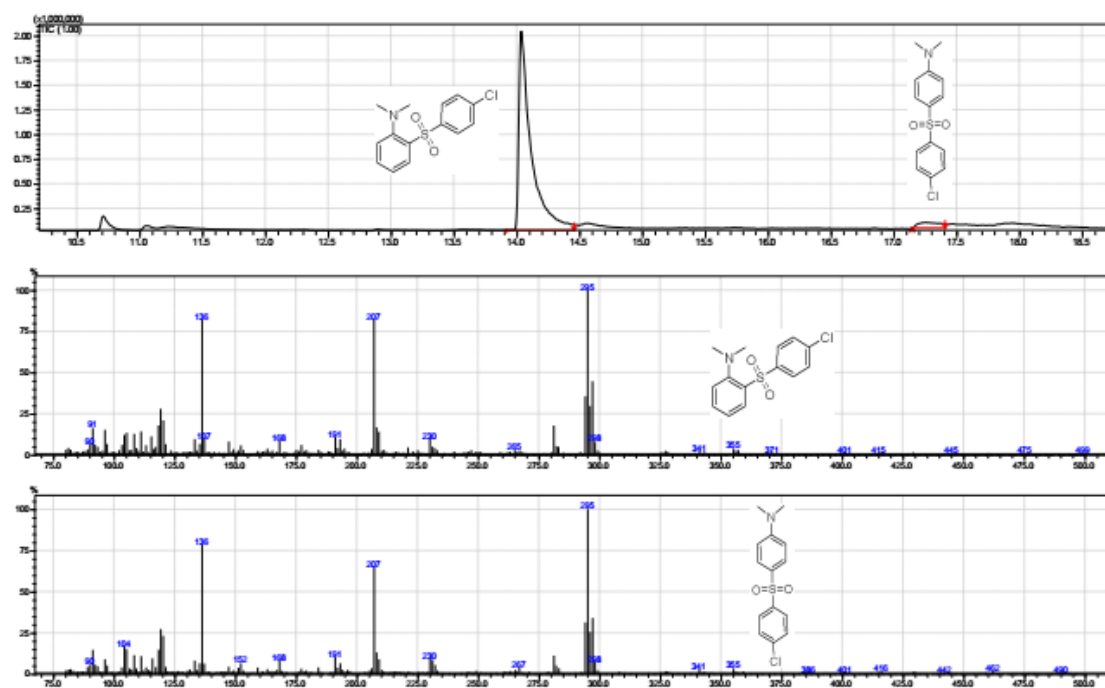

Figure S4. GC-MS of 3ja

Table S2 GC-MS Analytical data of 3ja

| Peak# | Ret.Time | Start Tm | End Tm | m/z | Area     | Area% | Height  | Height% | A/H   |
|-------|----------|----------|--------|-----|----------|-------|---------|---------|-------|
| 1     | 14.033   | 13.965   | 14.470 | TIC | 13713109 | 96.97 | 2015161 | 98.17   | 6.80  |
| 2     | 17.253   | 17.165   | 17.420 | TIC | 427775   | 3.03  | 37549   | 1.83    | 11.39 |

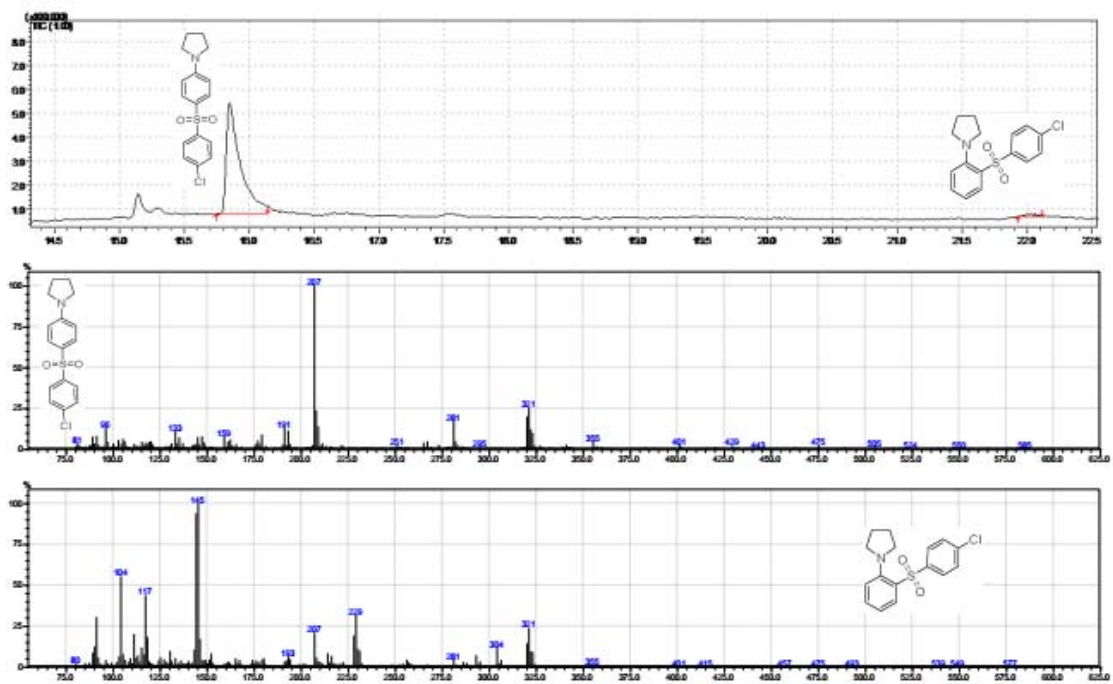

Figure S5. GC-MS of 3ka

Table S3 GC-MS Analytical data of 3ka

| Peak# | Ret.Time | Start Tm | End Tm | m/z | Area    | Area% | Height | Height% | A/H  |
|-------|----------|----------|--------|-----|---------|-------|--------|---------|------|
| 1     | 15.849   | 15.760   | 16.220 | TIC | 3724040 | 96.48 | 468689 | 96.48   | 7.95 |
| 2     | 22.060   | 21.905   | 22.145 | TIC | 135767  | 3.52  | 17115  | 3.52    | 7.93 |



---

## (B) Analytical data <sup>a,b</sup>

### 2-((4-Chlorophenyl)sulfonyl)-4-methoxy-*N,N*-dimethylaniline(3aa):

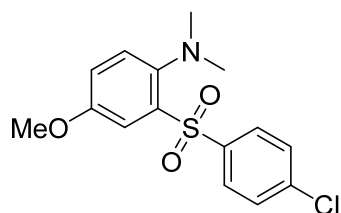

88.7mg, 91% yield; White solid; mp 137.8-139.1 °C (uncorrected); <sup>1</sup>H NMR (500 MHz, CDCl<sub>3</sub>) δ: 7.85-7.83(m, 2H), 7.73 (d, *J* = 5.0 Hz, 1H), 7.42 (m, 2H), 7.22 (d, *J* = 10 Hz, 1H), 7.12-7.10 (m, 1H), 3.87 (s, 3H), 2.33 (s, 6H); <sup>13</sup>C NMR (125MHz, CDCl<sub>3</sub>) δ: 156.8, 146.1, 140.7, 138.8, 138.5, 129.6, 128.2, 125.7, 121.5, 113.0, 55.8, 45.3; IR (neat, cm<sup>-1</sup>): 3071, 2948, 2836, 2796, 1902, 1573, 1493, 1291, 1265, 1152, 1082, 868; LRMS (EI, 70eV) *m/z* (%):327 (M<sup>+</sup>+2, 23),325 (M<sup>+</sup>,69), 310 (28), 148 (100), 134 (59); HRMS *m/z* (ESI) calcd for C<sub>15</sub>H<sub>16</sub><sup>35</sup>ClNO<sub>3</sub>S ([M+H]<sup>+</sup>) 326.0612, found 326.0617.

### 4-Methoxy-*N,N*-dimethyl-2-(phenylsulfonyl)aniline (3ab):

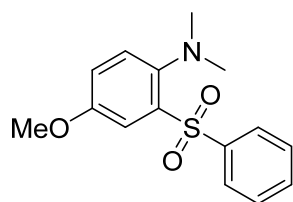

62.0mg, 71% yield; White solid; mp 135.7-137.1 °C (uncorrected); <sup>1</sup>H NMR (500 MHz, CDCl<sub>3</sub>) δ: 7.89 (d, *J* = 10.0 Hz, 2H), 7.77 (s, 1H), 7.52 (t, *J* = 7.5 Hz, 1H), 7.44 (t, *J* = 7.5 Hz, 2H), 7.21 (d, *J* = 10.0 Hz, 1H), 7.11-7.09 (m, 1H), 3.88 (s, 3H), 2.30 (s, 6H); <sup>13</sup>C NMR (125MHz, CDCl<sub>3</sub>) δ: 156.7, 146.2, 142.2, 139.0, 132.3, 128.0, 127.9, 125.7, 121.4, 112.9, 55.8, 45.2; IR (neat, cm<sup>-1</sup>): 3089, 2944, 2854, 2784, 1603, 1496, 1296, 1147, 1045; LRMS (EI, 70eV) *m/z* (%): 291 (M<sup>+</sup>, 82), 226 (28), 148 (100), 134 (67); HRMS *m/z* (ESI) calcd for C<sub>15</sub>H<sub>17</sub>NO<sub>3</sub>S ([M+H]<sup>+</sup>) 292.1002, found: 292.1013.

### 4-Methoxy-*N,N*-dimethyl-2-tosylaniline (3ac):

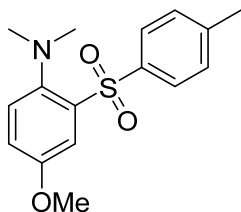

58.6mg, 64% yield; White solid; mp 128.1-129.5 °C (uncorrected);  $^1\text{H NMR}$  (500 MHz,  $\text{CDCl}_3$ )  $\delta$ : 7.78 (d,  $J = 10.0$  Hz, 2H), 7.75 (d,  $J = 5.0$  Hz, 1H), 7.24 (d,  $J = 10.0$  Hz, 2H), 7.20 (d,  $J = 10.0$  Hz, 1H), 7.10-7.07 (m, 1H), 3.87 (s, 3H), 2.39 (s, 3H), 2.32 (s, 6H);  $^{13}\text{C NMR}$  (125MHz,  $\text{CDCl}_3$ )  $\delta$ : 156.7, 146.3, 143.1, 139.3, 139.2, 128.6, 128.2, 125.6, 121.2, 112.9, 55.8, 45.3, 21.5; IR (neat,  $\text{cm}^{-1}$ ): 2947, 2824, 2784, 1594, 1495, 1298, 1264, 1147, 1091, 869; LRMS (EI, 70eV)  $m/z$  (%): 305 ( $\text{M}^+$ , 84), 240 (39), 148 (100), 134 (66); HRMS  $m/z$  (ESI) calcd for  $\text{C}_{16}\text{H}_{19}\text{NO}_3\text{S}$  ( $[\text{M}+\text{H}]^+$ ) 306.1158, found: 306.1162.

**4-Methoxy-2-((4-methoxyphenyl)sulfonyl)-*N,N*-dimethylaniline (3ad):**

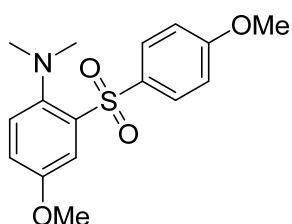

62.6mg, 65% yield; White solid; mp 132.5-133.5 °C (uncorrected);  $^1\text{H NMR}$  (500 MHz,  $\text{CDCl}_3$ )  $\delta$ : 7.86 (d,  $J = 10.0$  Hz, 2H), 7.74 (d,  $J = 5.0$  Hz, 1H), 7.21 (d,  $J = 10.0$  Hz, 1H), 7.10-7.07 (m, 1H), 6.91 (d,  $J = 10.0$  Hz, 2H), 3.86 (s, 3H), 3.84 (s, 3H), 2.35 (s, 6H);  $^{13}\text{C NMR}$  (125MHz,  $\text{CDCl}_3$ )  $\delta$ : 162.8, 156.6, 146.1, 139.4, 133.6, 130.5, 125.6, 120.9, 113.1, 112.8, 55.8, 55.5, 45.5; IR (neat,  $\text{cm}^{-1}$ ): 3099, 2943, 2833, 2786, 1594, 1487, 1291, 1265, 1145, 1092, 868; LRMS (EI, 70eV)  $m/z$  (%): 321 ( $\text{M}^+$ , 58), 256 (31), 148 (76), 121 (100); HRMS  $m/z$  (ESI) calcd for  $\text{C}_{16}\text{H}_{19}\text{NO}_4\text{S}$  ( $[\text{M}+\text{H}]^+$ ) 322.1108, found: 322.1121.

**2-((4-Bromophenyl)sulfonyl)-4-methoxy-*N,N*-dimethylaniline (3ae):**

90.8mg, 82% yield; White solid; mp 158.6-160.0 °C (uncorrected);  $^1\text{H NMR}$  (500 MHz,

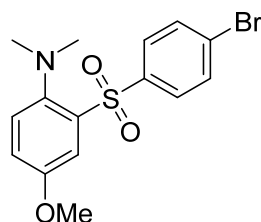

CDCl<sub>3</sub>)  $\delta$ : 7.77 (d,  $J$  = 10.0 Hz, 2H), 7.73 (s, 1H), 7.59 (d,  $J$  = 10.0 Hz, 2H), 7.23-7.21 (m, 1H), 7.13-7.10 (m, 1H), 3.87 (s, 3H), 2.33 (s, 6H); <sup>13</sup>C NMR (125MHz, CDCl<sub>3</sub>)  $\delta$ : 156.8, 146.1, 141.2, 138.5, 131.2, 129.7, 127.4, 125.7, 121.6, 113.0, 55.9, 45.3; IR (neat, cm<sup>-1</sup>): 2946, 2838, 2796, 1909, 1572, 1491, 1291, 1263, 1149, 1088, 868; LRMS (EI, 70eV)  $m/z$  (%): 371 (M<sup>+</sup>+2, 44), 369 (M<sup>+</sup>, 45), 354 (23), 148 (100), 134 (60); HRMS  $m/z$  (ESI) calcd for C<sub>15</sub>H<sub>16</sub><sup>79</sup>BrNO<sub>3</sub>S ([M+H]<sup>+</sup>) 370.0107, found: 370.0121.

#### 4-((2-(Dimethylamino)-5-methoxyphenyl)sulfonyl)benzonitrile (3af):

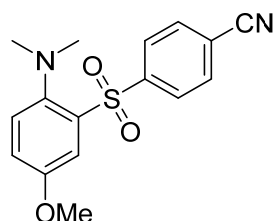

71.1mg, 75% yield; Yellow solid; mp 156.5-157.9 °C (uncorrected); <sup>1</sup>H NMR (500 MHz, CDCl<sub>3</sub>)  $\delta$ : 7.99 (d,  $J$  = 10.0 Hz, 2H), 7.75 (d,  $J$  = 5.0 Hz, 2H), 7.32 (s, 1H), 7.23 (d,  $J$  = 10.0 Hz, 1H), 7.16-7.14 (m, 1H), 3.89 (s, 3H), 2.29 (s, 6H); <sup>13</sup>C NMR (125MHz, CDCl<sub>3</sub>)  $\delta$ : 157.0, 146.6, 146.0, 137.8, 131.8, 128.5, 125.8, 122.0, 117.5, 115.8, 113.1, 55.9, 45.1; IR (neat, cm<sup>-1</sup>): 3091, 2967, 2864, 2790, 2234, 1606, 1497, 1304, 1226, 1148, 1090; LRMS (EI, 70eV)  $m/z$  (%): 316 (M<sup>+</sup>, 87), 251 (27), 148 (100), 134 (59); HRMS  $m/z$  (ESI) calcd for C<sub>16</sub>H<sub>16</sub>N<sub>2</sub>O<sub>3</sub>S ([M+H]<sup>+</sup>) 317.0954, found: 317.0963.

#### 2-((3-Chlorophenyl)sulfonyl)-4-methoxy-*N,N*-dimethylaniline (3ag):

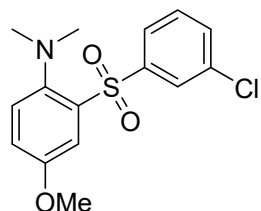

60.5mg, 62% yield; Yellow solid; mp 136.2-138.0 °C (uncorrected); <sup>1</sup>H NMR (500 MHz, CDCl<sub>3</sub>)  $\delta$ : 7.92 (t,  $J$  = 2.5 Hz, 1H), 7.77 (d,  $J$  = 10.0 Hz, 1H), 7.73 (d,  $J$  = 5.0 Hz, 1H), 7.51-7.49 (m, 1H), 7.39 (t,  $J$  = 7.5 Hz, 1H), 7.23 (d,  $J$  = 10.0 Hz, 1H), 7.14-7.11 (m, 1H), 3.88 (s, 3H), 2.34 (s, 6H); <sup>13</sup>C NMR (125MHz, CDCl<sub>3</sub>)  $\delta$ : 156.9, 146.2, 143.8, 138.4,

134.1, 132.5, 129.3, 128.4, 126.2, 125.8, 121.7, 113.0, 55.9, 45.3; IR (neat,  $\text{cm}^{-1}$ ): 3087, 2935, 2854, 2824, 1577, 1496, 1292, 1150, 1043, 867, 795; LRMS (EI, 70eV)  $m/z$  (%): 327 ( $M^{+2}$ , 26), 325 ( $M^{+}$ , 78), 310 (31), 148 (100), 134 (58); HRMS  $m/z$  (ESI) calcd for  $\text{C}_{15}\text{H}_{16}^{35}\text{ClNO}_3\text{S}$  ( $[M+H]^+$ ) 326.0612, found: 326.0626.

**2-((2-Chlorophenyl)sulfonyl)-4-methoxy-*N,N*-dimethylaniline (3ah):**

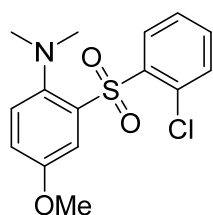

70.2mg, 72% yield; Yellow solid; mp 130.4-131.4  $^{\circ}\text{C}$  (uncorrected);  $^1\text{H}$  NMR (500 MHz,  $\text{CDCl}_3$ )  $\delta$ : 8.32-8.30 (m, 1H), 7.76 (d,  $J = 5.0$  Hz, 1H), 7.47-7.45 (m, 2H), 7.36-7.34 (m, 1H), 7.22 (d,  $J = 10.0$  Hz, 1H), 7.14-7.12 (m, 1H); 3.88 (s, 3H), 2.19 (s, 6H);  $^{13}\text{C}$  NMR (125MHz,  $\text{CDCl}_3$ )  $\delta$ : 156.9, 145.9, 139.9, 138.5, 133.3, 131.4, 131.4, 130.9, 126.3, 125.5, 121.7, 113.5, 55.9, 44.8; IR (neat,  $\text{cm}^{-1}$ ): 2976, 2856, 2824, 2783, 1491, 1453, 1305, 1147, 1032, 869, 763; LRMS (EI, 70eV)  $m/z$  (%): 327 ( $M^{+2}$ , 24), 325 ( $M^{+}$ , 71), 310 (16), 148 (100), 134 (62); HRMS  $m/z$  (ESI) calcd for  $\text{C}_{15}\text{H}_{16}^{35}\text{ClNO}_3\text{S}$  ( $[M+H]^+$ ) 326.0612, found: 326.0623.

**4-Methoxy-*N,N*-dimethyl-2-(naphthalen-2-ylsulfonyl)aniline (3ai):**

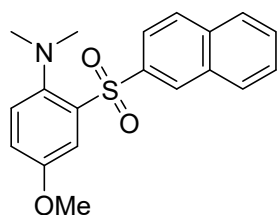

63.4mg, 62% yield; Yellow solid; mp 136.6-137.6  $^{\circ}\text{C}$  (uncorrected);  $^1\text{H}$  NMR (500 MHz,  $\text{CDCl}_3$ )  $\delta$ : 8.50 (s, 1H), 7.93 (d,  $J = 10.0$  Hz, 1H), 7.90-7.87 (m, 3H), 7.83 (d,  $J = 5.0$  Hz, 1H), 7.61-7.54 (m, 2H), 7.18 (d,  $J = 5.0$  Hz, 1H), 7.10-7.08 (m, 1H), 3.89 (s, 3H), 2.27 (s, 6H);  $^{13}\text{C}$  NMR (125MHz,  $\text{CDCl}_3$ )  $\delta$ : 156.8, 146.2, 139.2, 139.1, 134.7, 131.9, 129.4, 129.1, 128.5, 127.8, 127.8, 127.1, 125.7, 123.6, 121.4, 113.0, 55.9, 45.3; IR (neat,  $\text{cm}^{-1}$ ): 3069, 2936, 2857, 2786, 1492, 1439, 1220, 1148, 1076, 755; LRMS (EI, 70eV)  $m/z$  (%): 341 ( $M^{+}$ , 100), 262 (82), 148 (86), 134 (69); HRMS  $m/z$  (ESI) calcd

for C<sub>19</sub>H<sub>19</sub>NO<sub>3</sub>S ([M+H]<sup>+</sup>) 342.1158, found: 342.1171.

**2-((2,6-Dichlorophenyl)sulfonyl)-4-methoxy-*N,N*-dimethylaniline (3aj):**

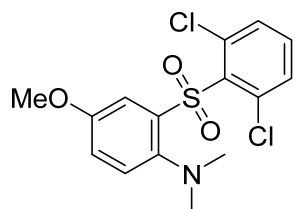

67.9mg, 63% yield; Yellow solid; mp 149.2-151.1 °C

(uncorrected); <sup>1</sup>H NMR (500 MHz, CDCl<sub>3</sub>) δ: 7.66 (d, *J* = 5.0

Hz, 1H), 7.38 (d, *J* = 10.0 Hz, 2H), 7.29-7.27 (m, 2H), 7.14-

7.12 (m 1H), 3.88 (s, 3H), 2.28 (s, 6H); <sup>13</sup>C NMR (125MHz, CDCl<sub>3</sub>) δ: 157.0, 145.7,

140.4, 137.5, 135.5, 131.9, 131.0, 125.7, 121.8, 112.6, 56.0, 45.3; IR (neat, cm<sup>-1</sup>):

3077, 2950, 2829, 2789, 1492, 1426, 1314, 1155, 1034, 835, 781; LRMS (EI, 70eV)

*m/z* (%): 363 (M<sup>+</sup>+4, 28), 359 (M<sup>+</sup>, 84), 183 (30), 148 (94), 121 (100); HRMS *m/z*

(ESI) calcd for C<sub>15</sub>H<sub>15</sub><sup>35</sup>Cl<sub>2</sub>NO<sub>3</sub>S ([M+H]<sup>+</sup>) 360.0222, found: 360.0233.

**4-Methoxy-*N,N*-dimethyl-2-((2,4,6-trichlorophenyl)sulfonyl)aniline (3ak):**

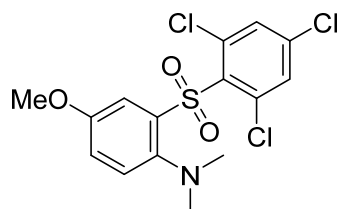

78.8mg, 67% yield; Yellow solid; mp 153.6-154.4 °C

(uncorrected); <sup>1</sup>H NMR (500 MHz, CDCl<sub>3</sub>) δ: 7.64 (d, *J* =

5.0 Hz, 1H), 7.41 (s, 2H), 7.28 (d, *J* = 10.0 Hz, 1H), 7.16-

7.13 (m, 1H), 3.87 (s, 3H), 2.32 (s, 6H); <sup>13</sup>C NMR (125MHz, CDCl<sub>3</sub>) δ: 157.1, 145.6,

139.9, 137.3, 136.3, 136.2, 130.6, 125.7, 121.9, 112.7, 55.9, 45.4; IR (neat, cm<sup>-1</sup>):

3091, 2942, 2825, 2783, 1537, 1498, 1363, 1318, 1159, 1032, 831, 799; HRMS *m/z*

(ESI) calcd for C<sub>15</sub>H<sub>14</sub><sup>35</sup>Cl<sub>3</sub>NO<sub>3</sub>S ([M+H]<sup>+</sup>) 393.9833, found: 393.9842.

**2-((2,3-Dihydrobenzofuran-5-yl)sulfonyl)-4-methoxy-*N,N*-dimethylaniline (3al):**

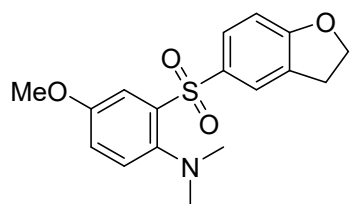

60.9mg, 61% yield; Yellow solid; mp 131.2-133.5 °C

(uncorrected); <sup>1</sup>H NMR (500 MHz, CDCl<sub>3</sub>) δ: 7.76-7.73

(m, 3H), 7.22 (d, *J* = 10.0 Hz, 1H), 7.09-7.04 (m, 1H),

6.79 (d,  $J = 10.0$  Hz, 1H), 4.64 (t,  $J = 7.5$  Hz, 2H), 3.86 (s, 3H), 3.22 (t,  $J = 10.0$  Hz, 2H), 2.38 (s, 6H);  $^{13}\text{C}$  NMR (125MHz,  $\text{CDCl}_3$ )  $\delta$ : 163.7, 156.6, 146.2, 139.6, 133.6, 130.2, 127.0, 125.6, 125.6, 120.9, 112.9, 108.5, 55.8, 45.6, 28.9; IR (neat,  $\text{cm}^{-1}$ ): 2959, 2831, 2783, 1601, 1483, 1291, 1266, 1135, 1164, 716; LRMS (EI, 70eV)  $m/z$  (%): 333 ( $\text{M}^+$ , 82), 268 (54), 148 (100), 121 (88); IR (KBr,  $\text{cm}^{-1}$ ): 2959, 2831, HRMS  $m/z$  (ESI) calcd for  $\text{C}_{17}\text{H}_{19}\text{NO}_4\text{S}$  ( $[\text{M}+\text{H}]^+$ ) 334.1008, found: 334.1012.

**4-Methoxy-*N,N*-dimethyl-2-(thiophen-2-ylsulfonyl)aniline (3am):**

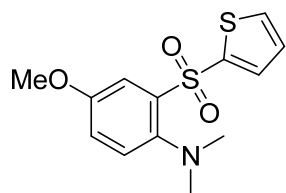

66.8mg, 75% yield; Yellow solid; mp 122.1-122.4 °C (uncorrected);  $^1\text{H}$  NMR (500 MHz,  $\text{CDCl}_3$ )  $\delta$ : 7.73-7.72 (m, 1H), 7.70 (d,  $J = 3.0$  Hz, 1H), 7.61-7.60 (m, 1H), 7.28 (d,  $J = 10.0$  Hz, 1H), 7.12-7.09 (m, 1H), 7.04-7.02 (m, 1H), 3.85 (s, 3H), 2.54 (s, 6H);  $^{13}\text{C}$  NMR (125MHz,  $\text{CDCl}_3$ )  $\delta$ : 156.6, 146.7, 143.0, 139.0, 133.8, 133.2, 126.4, 125.4, 121.2, 112.9, 55.8, 46.0; IR (neat,  $\text{cm}^{-1}$ ): 3101, 2939, 2833, 2791, 1601, 1497, 1399, 1308, 1146, 1033, 857, 740; LRMS (EI, 70eV)  $m/z$  (%): 297 ( $\text{M}^+$ , 100), 218 (58), 148 (90), 121 (97); HRMS  $m/z$  (ESI) calcd for  $\text{C}_{13}\text{H}_{15}\text{NO}_3\text{S}_2$  ( $[\text{M}+\text{H}]^+$ ) 298.0566, found: 298.0572.

**4-Methoxy-*N,N*-dimethyl-2-(pyridin-3-ylsulfonyl)aniline(3an):**

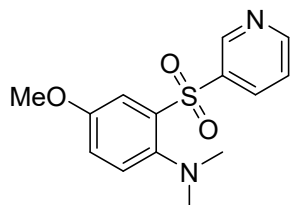

72.7mg, 83% yield; Yellow solid; mp 80.9-90.0 °C (uncorrected);  $^1\text{H}$  NMR (500 MHz,  $\text{CDCl}_3$ )  $\delta$ : 9.05 (s, 1H), 8.70-8.69 (m, 1H), 8.14-8.12 (m, 1H), 7.69 (d,  $J = 3.0$  Hz, 1H), 7.37-7.34 (m, 1H), 7.18 (d,  $J = 8.5$  Hz, 1H), 7.10-7.07 (m, 1H), 3.83 (s, 3H), 2.29 (s, 6H);  $^{13}\text{C}$  NMR (125MHz,  $\text{CDCl}_3$ )  $\delta$ : 156.9, 152.7, 149.4, 145.9, 138.4, 138.1, 135.8,

125.7, 122.6, 121.8, 112.9, 55.8, 45.3; IR (neat,  $\text{cm}^{-1}$ ): 2980, 1674, 1484, 1296, 1269, 1148, 1126, 1024, 953, 752; HRMS  $m/z$  (ESI) calcd for  $\text{C}_{14}\text{H}_{16}\text{N}_2\text{O}_3\text{S}$  ( $[\text{M}+\text{H}]^+$ ) 293.0954, found: 293.0959.

**4-Methoxy-*N,N*-dimethyl-2-(methylsulfonyl)aniline(3ao):**

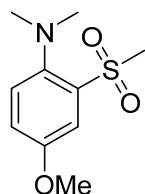

35.0mg, 51% yield; Yellow solid; mp 75.1-76.5 °C (uncorrected);  $^1\text{H}$  NMR (500 MHz,  $\text{CDCl}_3$ )  $\delta$ : 7.50 (d,  $J = 5.0$  Hz, 1H), 7.40 (d,  $J = 10.0$  Hz, 1H), 7.15-7.13 (m, 1H), 3.84 (s, 3H), 3.35 (s, 3H), 2.73 (s, 6H);  $^{13}\text{C}$  NMR (125MHz,  $\text{CDCl}_3$ )  $\delta$ : 156.5, 146.4, 137.5, 124.9, 120.9, 112.7, 55.7, 46.2, 42.5; IR (neat,  $\text{cm}^{-1}$ ): 3032, 2958, 2824, 2779, 1603, 1488, 1296, 1145, 1023, 825, 769, 527; LRMS (EI, 70eV)  $m/z$  (%): 213 (M- $\text{CH}_3$ , 49), 198 (44), 132 (100), 105 (74); HRMS  $m/z$  (ESI) calcd for  $\text{C}_{10}\text{H}_{15}\text{NO}_3\text{S}$  ( $[\text{M}+\text{H}]^+$ ) 230.0845, found: 230.0862.

**2-(Cyclopropylsulfonyl)-4-methoxy-*N,N*-dimethylaniline (3ap):**

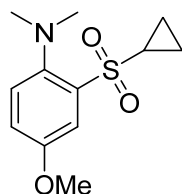

50.5mg, 66% yield; White solid; mp 131.4-131.9 °C (uncorrected);  $^1\text{H}$  NMR (500 MHz,  $\text{CDCl}_3$ )  $\delta$ : 7.43-7.30 (m, 2H), 7.11 (d,  $J = 10.0$  Hz, 1H), 3.83 (s, 3H), 3.44-3.39 (m, 1H), 2.74 (s, 6H), 1.27-1.25 (m, 2H), 0.97-0.95 (m, 2H);  $^{13}\text{C}$  NMR (125MHz,  $\text{CDCl}_3$ )  $\delta$ : 156.7, 146.6, 138.2, 125.2, 120.6, 112.7, 55.8, 46.3, 31.3, 5.4; IR (neat,  $\text{cm}^{-1}$ ): 3088, 2947, 2830, 2791, 1603, 1489, 1306, 1286, 1133, 1034, 883; LRMS (EI, 70eV)  $m/z$  (%): 255 ( $\text{M}^+$ , 69), 240 (37), 148 (100), 134 (55); HRMS  $m/z$  (ESI) calcd for  $\text{C}_{12}\text{H}_{17}\text{NO}_3\text{S}$  ( $[\text{M}+\text{H}]^+$ ) 256.1002, found: 256.1020.

**Methyl 3-((2-(dimethylamino)-5-methoxyphenyl)sulfonyl)propanoate (3aq):**

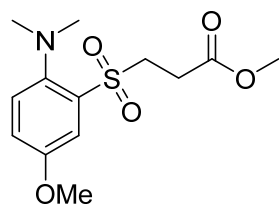

44.2mg, 49% yield; Yellow liquid;  $^1\text{H}$  NMR (500 MHz,  $\text{CDCl}_3$ )

$\delta$ : 7.51 (d,  $J = 3.0$  Hz, 1H), 7.38 (d,  $J = 10.0$  Hz, 1H), 7.16-7.14

(m, 1H), 3.90 (t,  $J = 7.5$  Hz, 2H), 3.84 (s, 3H), 3.65 (s, 3H), 2.72

(s, 6H), 2.69 (t,  $J = 7.5$  Hz, 2H);  $^{13}\text{C}$  NMR (125MHz,  $\text{CDCl}_3$ )  $\delta$ : 170.7, 156.7, 146.8,

135.4, 124.8, 121.3, 113.8, 55.8, 52.1, 49.2, 46.3, 27.7; IR (neat,  $\text{cm}^{-1}$ ): 3310, 2963,

2858, 1610, 1497, 1301, 1243, 1136, 833; LRMS (EI, 70eV)  $m/z$  (%): 301 ( $\text{M}^+$ , 100),

242 (39), 148 (91), 120 (58); HRMS  $m/z$  (ESI) calcd for  $\text{C}_{13}\text{H}_{19}\text{NO}_5\text{S}$  ( $[\text{M}+\text{H}]^+$ )

302.1057, found: 302.1062.

#### 2-((4-Chlorophenyl)sulfonyl)-N,N,4-trimethylaniline(3ba):

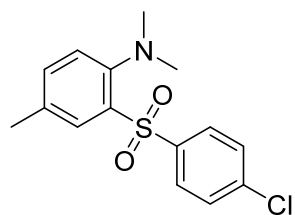

53.8mg, 58% yield; Yellow solid; mp 125.1-126.5  $^{\circ}\text{C}$

(uncorrected);  $^1\text{H}$  NMR (500 MHz,  $\text{CDCl}_3$ )  $\delta$ : 8.03 (d,  $J = 5.0$

Hz, 1H), 7.84-7.82 (m, 2H), 7.42-7.40 (m, 2H), 7.39-7.37 (m,

1H), 7.17 (d,  $J = 10$  Hz, 1H), 2.41 (s, 3H), 2.38 (s, 6H);  $^{13}\text{C}$  NMR (125MHz,  $\text{CDCl}_3$ )  $\delta$ :

151.0, 140.9, 138.8, 137.1, 135.6, 135.5, 129.7, 129.6, 128.2, 124.3, 45.3, 20.9; IR

(neat,  $\text{cm}^{-1}$ ): 2950, 2866, 2839, 1911, 1573, 1490, 1304, 1265, 1149, 825; LRMS (EI,

70eV)  $m/z$  (%): 311 ( $\text{M}^++2$ , 12), 309 ( $\text{M}^+$ , 37), 244 (36), 132 (100), 105 (75); HRMS

$m/z$  (ESI) calcd for  $\text{C}_{15}\text{H}_{16}^{35}\text{ClNO}_2\text{S}$  ( $[\text{M}+\text{H}]^+$ ) 310.0663, found: 310.0672.

#### 4-(Tert-butyl)-2-((4-chlorophenyl)sulfonyl)-N,N-dimethylaniline (3ca):

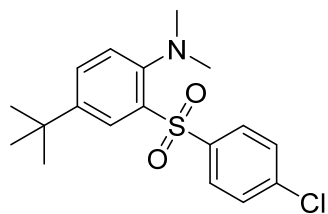

42.1mg, 40% yield; White solid; mp 126.1-127.2  $^{\circ}\text{C}$

(uncorrected);  $^1\text{H}$  NMR (500 MHz,  $\text{CDCl}_3$ )  $\delta$ : 8.23 (d,  $J =$

5.0 Hz, 1H), 7.84 (d,  $J = 5.0$  Hz, 2H), 7.60-7.58 (m, 1H),

7.41 (d,  $J = 10.0$  Hz, 2H), 7.21 (d,  $J = 10.0$  Hz, 1H), 2.38 (s, 6H), 1.36 (s, 9H);  $^{13}\text{C}$



NMR (125MHz, CDCl<sub>3</sub>)  $\delta$ : 150.9, 148.8, 141.0, 138.7, 136.9, 132.0, 129.6, 128.2, 126.2, 124.0, 45.3, 34.9, 31.2; IR(neat, cm<sup>-1</sup>): 3092, 2969, 2863, 2830, 1576, 1491, 1303, 1153, 1088, 833, 758, 603; LRMS (EI, 70eV)  $m/z$  (%): 338 (M<sup>+</sup>+2, 11), 351 (M<sup>+</sup>, 33), 336 (67), 286 (25), 160 (100); HRMS  $m/z$  (ESI) calcd for C<sub>18</sub>H<sub>22</sub><sup>35</sup>ClNO<sub>2</sub>S ([M+H]<sup>+</sup>) 352.1133, found: 352.1142.

**4-Bromo-2-((4-chlorophenyl)sulfonyl)-*N,N*-dimethylaniline(3da):**

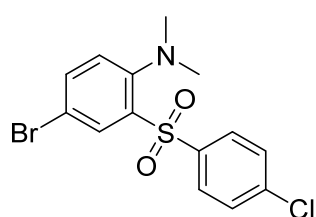

45.9mg, 41% yield; White solid; mp 128.0-128.9 °C (uncorrected); <sup>1</sup>H NMR (500 MHz, CDCl<sub>3</sub>)  $\delta$ : 8.36 (d,  $J$  = 5.0 Hz, 1H), 7.83 (d,  $J$  = 10.0 Hz, 2H), 7.68-7.65 (m, 1H), 7.44 (d,  $J$  = 5.0 Hz, 2H), 7.16-7.14 (m, 1H), 2.42 (s, 6H); <sup>13</sup>C NMR (125MHz, CDCl<sub>3</sub>)  $\delta$ : 152.6, 140.0, 139.4, 139.1, 137.9, 132.5, 129.7, 128.4, 126.1, 118.2, 45.3; LRMS (EI, 70eV)  $m/z$  (%): 377 (M<sup>+</sup>+4, 33), 373 (M<sup>+</sup>, 49), 310 (48), 198 (100), 169 (88); IR (neat, cm<sup>-1</sup>): 3084, 2945, 2842, 2800, 1576, 1476, 1308, 1151, 1089, 838, 757; HRMS  $m/z$  (ESI) calcd for C<sub>14</sub>H<sub>13</sub><sup>79</sup>Br<sup>35</sup>ClNO<sub>2</sub>S ([M+H]<sup>+</sup>) 373.9612, found: 374.1021.

**2-((4-Chlorophenyl)sulfonyl)-*N,N*-dimethyl-4-(trifluoromethyl)aniline(3ea):**

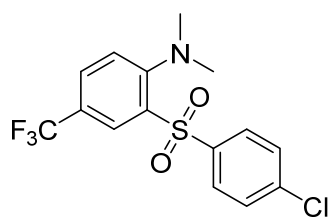

54.5mg, 50% yield; Yellow solid; mp 134.2-135.2 °C (uncorrected); <sup>1</sup>H NMR (500 MHz, CDCl<sub>3</sub>)  $\delta$ : 8.51 (s, 1H), 7.83 (d,  $J$  = 10.0 Hz, 2H), 7.81-7.79 (m, 1H), 7.45 (d,  $J$  = 10.0 Hz, 2H), 7.34 (d,  $J$  = 10.0 Hz, 1H), 2.54 (s, 6H); <sup>13</sup>C NMR (125MHz, CDCl<sub>3</sub>)  $\delta$ : 156.7, 139.7, 139.6, 137.5, 131.6 (q,  $J$  = 10.4 Hz), 129.7, 128.5, 127.6 (q,  $J$  = 5.7 Hz), 124.5, 45.3; <sup>19</sup>F NMR (471 MHz, CDCl<sub>3</sub>)  $\delta$ : -62.26; IR (neat, cm<sup>-1</sup>): 3097, 2841, 2799, 1927, 1610, 1498, 1329, 1131, 830, 759; LRMS (EI, 70eV)  $m/z$  (%): 300 (M<sup>+</sup>+2, 8),

363 ( $M^+$ , 24), 298 (29), 186 (73), 159 (100); HRMS  $m/z$  (ESI) calcd for  $C_{15}H_{13}^{35}ClF_3NO_2S$  ( $[M+H]^+$ ) 364.0380, found: 364.0401.

**2-((4-Chlorophenyl)sulfonyl)-*N,N*,4,5-tetramethylaniline and 2-((4-**

**Chlorophenyl)sulfonyl)-*N,N*,3,4-tetramethylaniline (3fa):**

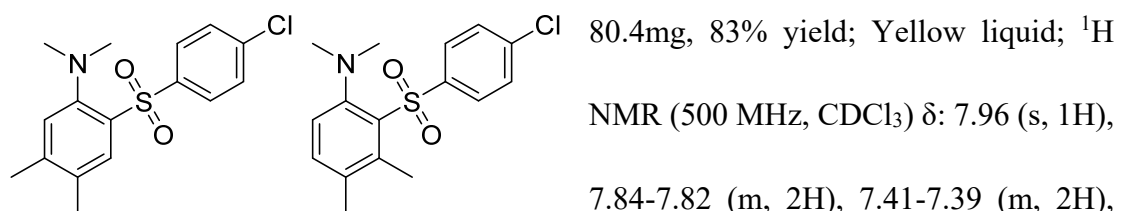

7.02 (s, 1H), 2.39 (s, 6H), 2.31 (s, 3H), 2.27 (s, 3H);  $^{13}C$  NMR (125MHz,  $CDCl_3$ )  $\delta$ : 151.2, 144.6, 141.2, 138.6, 134.5, 134.1, 130.2, 129.5, 128.2, 128.0, 127.3, 125.4, 45.4, 20.0, 19.3; LRMS (EI, 70eV)  $m/z$  (%): 325 ( $M^+ + 2$ , 16), 323 ( $M^+$ , 49), 258 (38), 146 (87), 132 (100); HRMS  $m/z$  (ESI) calcd for  $C_{16}H_{18}^{35}ClNO_2S$  ( $[M+H]^+$ ) 324.0820, found: 324.0878.  $^1H$  NMR (500 MHz,  $CDCl_3$ )  $\delta$ : 7.40-7.38 (m, 4H), 7.31 (d,  $J = 10.0$  Hz, 1H), 6.96 (d,  $J = 10.0$  Hz, 1H), 2.74 (s, 3H), 2.27 (s, 3H), 2.18 (s, 6H);  $^{13}C$  NMR (125MHz,  $CDCl_3$ )  $\delta$ : 151.7, 144.9, 139.5, 138.6, 137.3, 136.4, 135.8, 135.3, 134.1, 130.1, 128.0, 127.9, 121.0, 44.6, 20.7, 17.2; LRMS (EI, 70eV)  $m/z$  (%): 325 ( $M^+ + 2$ , 4), 323 ( $M^+$ , 13), 244 (27), 146 (39), 132 (100); HRMS  $m/z$  (ESI) calcd for  $C_{16}H_{18}^{35}ClNO_2S$  ( $[M+H]^+$ ) 324.0820, found: 324.0824.

**4-((4-Chlorophenyl)sulfonyl)-2,6-dimethoxy-*N,N*-dimethylaniline (3ga):**

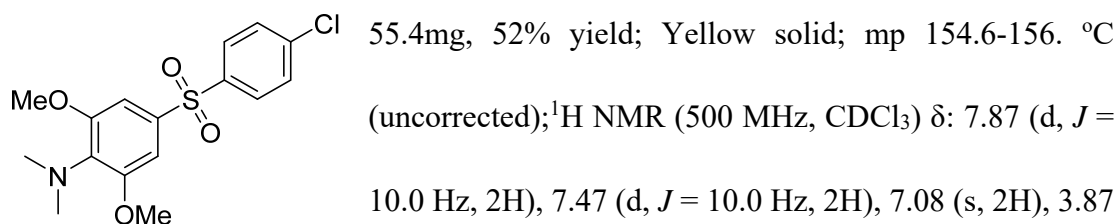

---

129.5, 128.7, 104.6, 56.2, 42.9; LRMS (EI, 70eV) m/z (%):357 (M<sup>+</sup>+2, 33), 355 (M<sup>+</sup>, 100), 340 (42), 207 (19), 147 (31); IR (neat, cm<sup>-1</sup>): 3085, 2932, 2862, 2834, 1947, 1580, 1455, 1310, 1120, 1084, 833, 753; HRMS m/z (ESI) calcd for C<sub>16</sub>H<sub>18</sub><sup>35</sup>ClNO<sub>4</sub>S ([M+H]<sup>+</sup>) 356.0718, found: 356.0648.

**4-((4-Chlorophenyl)sulfonyl)-3,5-dimethoxy-N,N-dimethylaniline (3ha):**

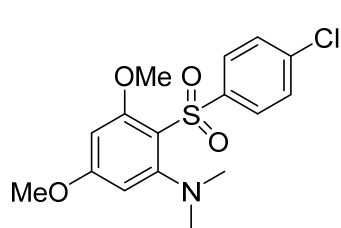

68.2mg, 64% yield; Yellow solid; mp 131.6-133.0 °C (uncorrected); <sup>1</sup>H NMR (500 MHz, CDCl<sub>3</sub>) δ: 7.67 (d, *J* = 10.0 Hz, 2H), 7.37 (d, *J* = 10.0 Hz, 2H), 6.12 (d, *J* = 2.5 Hz, 1H), 5.83 (d, *J* = 2.5 Hz, 1H), 3.80 (s, 3H), 3.35 (s, 3H), 2.98 (s, 6H); <sup>13</sup>C NMR (125MHz, CDCl<sub>3</sub>) δ: 164.5, 160.7, 156.3, 144.7, 137.6, 128.1, 128.0, 109.2, 95.6, 90.6, 55.3, 55.3, 45.5; LRMS (EI, 70eV) m/z (%):357 (M<sup>+</sup>+2, 10), 355(M<sup>+</sup>, 30), 290 (81), 178 (100), 150 (29); IR (neat, cm<sup>-1</sup>): 3089, 2974, 2843, 1589, 1474, 1303, 1145, 1089, 815, 754; HRMS m/z (ESI) calcd for C<sub>16</sub>H<sub>18</sub><sup>35</sup>ClNO<sub>4</sub>S ([M+H]<sup>+</sup>) 356.0718, found: 356.0792.

**4-((4-Chlorophenyl)sulfonyl)-N,N-diphenylaniline (3ia):**

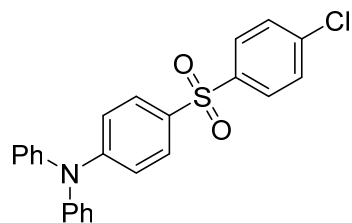

80.4mg, 64% yield; Yellow solid; mp 164.7-166.4 °C (uncorrected); <sup>1</sup>H NMR (500 MHz, CDCl<sub>3</sub>) δ: 7.85 (d, *J* = 10.0 Hz, 2H), 7.66 (d, *J* = 10.0 Hz, 2H), 7.45 (d, *J* = 10.0 Hz, 2H), 7.33-7.30 (m, 4H), 7.17-7.11 (m, 6H), 6.96 (d, *J* = 10.0 Hz, 2H); <sup>13</sup>C NMR (125MHz, CDCl<sub>3</sub>) δ: 152.3, 145.9, 141.1, 139.2, 131.0, 129.8, 129.4, 129.0, 128.8, 128.7, 126.2, 125.2, 122.3, 119.3; IR (neat, cm<sup>-1</sup>): 3066, 1579, 1489, 1306, 1147, 1106,

831, 761; HRMS  $m/z$  (ESI) calcd for  $C_{24}H_{18}^{35}ClNO_2S$  ( $[M+H]^+$ ) 420.0820, found:420.0873.

**2-((4-Chlorophenyl)sulfonyl)-*N,N*-dimethylaniline (3ja):**

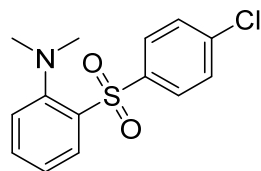

55.8mg, 63% yield; Yellow solid; mp 131.3-132.5 °C (uncorrected);  $^1H$  NMR (500 MHz,  $CDCl_3$ )  $\delta$ : 8.24-8.22 (m, 1H), 7.82 (d,  $J = 10.0$  Hz, 2H), 7.60-7.56 (m, 1H), 7.41 (d,  $J = 10.0$  Hz, 2H), 7.35-7.31 (m, 1H), 7.28-7.27 (m, 1H), 2.43 (s, 6H);  $^{13}C$  NMR (125MHz,  $CDCl_3$ )  $\delta$ : 153.7, 140.8, 138.9, 137.5, 135.0, 129.8, 129.6, 128.3, 125.27, 124.4, 45.4; LRMS (EI, 70eV)  $m/z$  (%): 297 ( $M^++2$ , 6) 295 ( $M^+$ , 19), 230 (34), 118 (97), 91 (100); IR (neat,  $cm^{-1}$ ): 3089, 2829, 1589, 1476, 1307, 1151, 1087; HRMS  $m/z$  (ESI) calcd for  $C_{14}H_{14}^{35}ClNO_2S$  ( $[M+H]^+$ ) 296.0507, found: 296.0621.

**1-(4-((4-Chlorophenyl)sulfonyl)phenyl)pyrrolidine (3ka):**

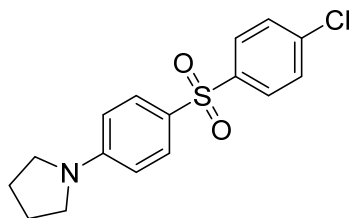

29.9mg, 31% yield; Yellow solid; mp 131.6-132.5 °C (uncorrected);  $^1H$  NMR (500 MHz,  $CDCl_3$ )  $\delta$ : 7.81 (d,  $J = 10.0$  Hz, 2H), 7.71 (d,  $J = 10.0$  Hz, 2H), 7.40 (d,  $J = 10.0$  Hz, 2H), 6.52 (d,  $J = 10.0$  Hz, 2H), 3.33-3.30 (m, 4H), 2.03-2.00 (m, 4H);  $^{13}C$  NMR (125MHz,  $CDCl_3$ )  $\delta$ : 150.8, 142.2, 138.6, 129.6, 129.2, 128.3, 125.0, 111.2, 47.6, 25.4; LRMS (EI, 70eV)  $m/z$  (%): 323 ( $M^++2$ , 33), 321 ( $M^+$ , 100), 320 (82), 162 (12), 159 (22); IR (neat,  $cm^{-1}$ ): 3087, 1579, 1489, 1306, 1147, 1106, 831, 761; HRMS  $m/z$  (ESI) calcd for  $C_{16}H_{16}^{35}ClNO_2S$  ( $[M+H]^+$ ) 322.0663, found: 322.0721.

**4-(2-((4-Chlorophenyl)sulfonyl)phenyl)morpholine (3la):**

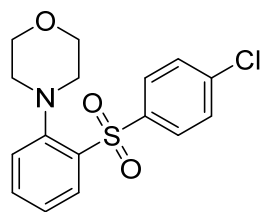

27.9mg, 27% yield; White solid; mp 128.8-131.3 °C (uncorrected);  $^1\text{H NMR}$  (500 MHz,  $\text{CDCl}_3$ )  $\delta$ : 8.31-8.29 (m, 1H), 7.82 (d,  $J = 10.0$  Hz, 2H), 7.65-7.63 (m, 1H), 7.44 (d,  $J = 10.0$  Hz, 2H), 7.42-7.39 (m, 1H), 7.32-7.30 (m, 1H), 3.63 (t,  $J = 5.0$  Hz, 4H), 2.75 (t,  $J = 5.0$  Hz, 4H);  $^{13}\text{C NMR}$  (125MHz,  $\text{CDCl}_3$ )  $\delta$ : 152.3, 141.1, 139.0, 136.7, 135.3, 130.7, 129.0, 128.6, 125.8, 124.4, 66.7, 53.6; LRMS (EI, 70eV)  $m/z$  (%): 339 ( $\text{M}^+ + 2$ , 11), 337 ( $\text{M}^+$ , 33), 242 (59), 214 (79), 180 (100); IR (neat,  $\text{cm}^{-1}$ ): 3063, 2935, 2852, 2834, 1573, 1472, 1282, 1249, 1157, 1083, 917, 833; HRMS  $m/z$  (ESI) calcd for  $\text{C}_{16}\text{H}_{16}^{35}\text{ClNO}_3\text{S}$  ( $[\text{M} + \text{H}]^+$ ) 338.0612, found: 338.0687.

#### 4-(4-((4-Chlorophenyl)sulfonyl)phenyl)morpholine (3la):

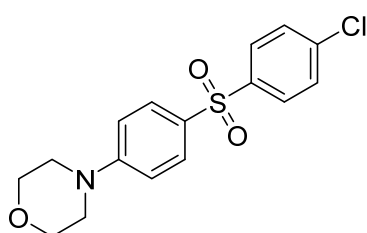

19.2mg, 19% yield; White solid; mp 127.2-128.7 °C (uncorrected);  $^1\text{H NMR}$  (500 MHz,  $\text{CDCl}_3$ )  $\delta$ : 7.83 (d,  $J = 10.0$  Hz, 2H), 7.77 (d,  $J = 10.0$  Hz, 2H), 7.43 (d,  $J = 10.0$  Hz, 2H), 6.88 (d,  $J = 10.0$  Hz, 2H), 3.83 (t,  $J = 5.0$  Hz, 4H), 3.27 (t,  $J = 5.0$  Hz, 4H);  $^{13}\text{C NMR}$  (125MHz,  $\text{CDCl}_3$ )  $\delta$ : 154.2, 141.3, 139.1, 129.5, 129.4, 129.3, 128.6, 113.8, 66.4, 47.2; IR (neat,  $\text{cm}^{-1}$ ): 3083, 2961, 2835, 1589, 1505, 1304, 1248, 1153, 1106, 828; HRMS  $m/z$  (ESI) calcd for  $\text{C}_{16}\text{H}_{16}^{35}\text{ClNO}_3\text{S}$  ( $[\text{M} + \text{H}]^+$ ) 338.0612, found: 338.0693.

#### 2-((4-Chlorophenyl)sulfonyl)-*N*-ethyl-*N*-methylaniline (3ma):

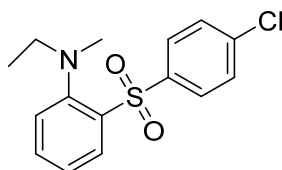

27.8mg, 30% yield; Yellow liquid;  $^1\text{H NMR}$  (500 MHz,  $\text{CDCl}_3$ )  $\delta$ : 8.28-8.26 (m, 1H), 7.81 (d,  $J = 10.0$  Hz, 2H), 7.60-7.56 (m, 1H), 7.41 (d,  $J = 10.0$  Hz, 2H), 7.36-7.32 (m, 1H), 7.24-7.22 (m,

1H), 2.82-2.78 (m, 2H), 2.38 (s, 3H), 0.68 (d,  $J = 10.0$  Hz, 3H);  $^{13}\text{C}$  NMR (125MHz,  $\text{CDCl}_3$ )  $\delta$ : 153.0, 140.8, 138.9, 137.6, 134.8, 130.1, 129.8, 128.3, 125.1, 125.0, 51.6, 42.8, 11.8; IR (neat,  $\text{cm}^{-1}$ ): 2983, 1590, 1520, 1472, 1393, 1314, 1153, 1109, 824, 767; LRMS (EI, 70eV)  $m/z$  (%): HRMS  $m/z$  (ESI) calcd for  $\text{C}_{15}\text{H}_{16}^{35}\text{ClNO}_2\text{S}$  ( $[\text{M}+\text{H}]^+$ ) 310.0063, found: 310.0098.

**4-((4-Chlorophenyl)sulfonyl)-*N*-ethyl-*N*-methylaniline (3ma):**

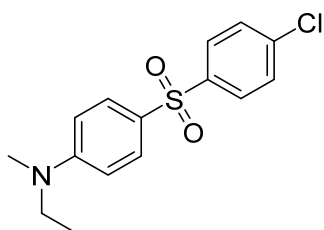

26.0mg, 28% yield; Yellow solid; mp 141.1-142.3 °C (uncorrected);  $^1\text{H}$  NMR (500 MHz,  $\text{CDCl}_3$ )  $\delta$ : 7.82 (d,  $J = 10.0$  Hz, 2H), 7.71 (d,  $J = 10.0$  Hz, 2H), 7.41 (d,  $J = 10.0$  Hz, 2H), 6.64 (d,  $J = 10.0$  Hz, 2H), 3.44-3.40 (m, 2H), 2.96 (s, 3H), 1.13 (t,  $J = 5.0$  Hz, 3H);  $^{13}\text{C}$  NMR (125MHz,  $\text{CDCl}_3$ )  $\delta$ : 152.1, 142.0, 138.6, 129.8, 129.6, 129.2, 128.4, 128.3, 125.3, 110.9, 46.6, 37.5, 11.3; LRMS (EI, 70eV)  $m/z$  (%): 309 (M- $\text{CH}_3$ , 35), 294 (100), 119 (33), 104 (5); IR (neat,  $\text{cm}^{-1}$ ): 2981, 1589, 1518, 1472, 1391, 1314, 1150, 1105, 827, 767; HRMS  $m/z$  (ESI) calcd for  $\text{C}_{15}\text{H}_{16}^{35}\text{ClNO}_2\text{S}$  ( $[\text{M}+\text{H}]^+$ ) 310.0063, found: 310.0102.

**4-((4-Chlorophenyl)sulfonyl)-*N,N*-dimethylnaphthalen-1-amine (3na):**

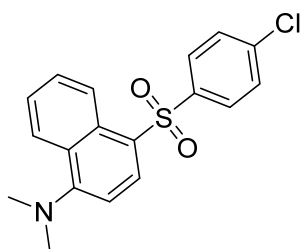

44.2mg, 43% yield; Yellow solid; mp 120.8-122.1 °C (uncorrected);  $^1\text{H}$  NMR (500 MHz,  $\text{CDCl}_3$ )  $\delta$ : 8.50 (d,  $J = 10.0$  Hz, 1H), 8.41 (d,  $J = 10.0$  Hz, 1H), 8.18 (d,  $J = 10.0$  Hz, 1H), 7.86 (d,  $J = 10.0$  Hz, 2H), 7.54-7.46 (m, 2H), 7.39 (d,  $J = 10.0$  Hz, 2H), 7.03 (d,  $J = 10.0$  Hz, 1H), 2.98 (s, 6H);  $^{13}\text{C}$  NMR (125MHz,  $\text{CDCl}_3$ )  $\delta$ : 157.2, 141.0, 139.1, 131.4, 130.1, 129.2, 128.5, 128.2, 128.0, 127.0, 125.7, 125.4, 124.4, 111.2, 44.6; IR (neat,  $\text{cm}^{-1}$ ): 2928, 2797, 1580, 1476, 1307, 1148, 1089, 825, 753;

---

LRMS (EI, 70eV) m/z (%):347 (M<sup>+</sup>+2, 33), 345 (M<sup>+</sup>, 100), 186 (41), 169 (38), 115 (19);

HRMS m/z (ESI) calcd for C<sub>18</sub>H<sub>16</sub><sup>35</sup>ClNO<sub>2</sub>S ([M+H]<sup>+</sup>) 346.0663, found: 346.0762.

**5-((4-Chlorophenyl)sulfonyl)-N,N-dimethylnaphthalen-1-amine (3na)**

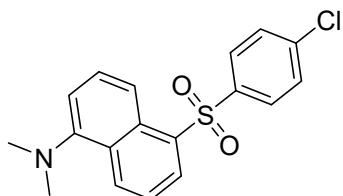

14.5mg, 14% yield; Yellow solid; mp 122.8-124.1 °C

(uncorrected); <sup>1</sup>H NMR (500 MHz, CDCl<sub>3</sub>) δ: 8.29 (d, *J* =

10.0 Hz, 1H), 7.96 (d, *J* = 10.0 Hz, 2H), 7.89 (d, *J* = 10.0 Hz,

1H), 7.81 (d, *J* = 10.0 Hz, 2H), 7.62-7.59 (m, 1H), 7.56-7.52 (m, 1H), 7.47 (d, *J* = 10.0

Hz, 2H), 2.59 (s, 6H); <sup>13</sup>C NMR (125MHz, CDCl<sub>3</sub>) δ: 149.7, 141.6, 138.6, 138.2, 137.8,

132.8, 129.5, 129.4, 128.8, 128.7, 128.4, 127.1, 126.6, 125.2, 124.1, 43.6; LRMS (EI,

70eV) m/z (%):347 (M<sup>+</sup>+2, 10), 345 (M<sup>+</sup>, 30), 330 (5), 168 (100), 141 (28); IR (neat, cm<sup>-1</sup>):

2920, 2791, 1577, 1475, 1307, 1145, 1086, 821, 756; HRMS m/z (ESI) calcd for

C<sub>18</sub>H<sub>16</sub><sup>35</sup>ClNO<sub>2</sub>S ([M+H]<sup>+</sup>) 346.0663, found: 346.0771.

**3-((4-Chlorophenyl)sulfonyl)-10-ethyl-10H-phenothiazine (3oa):**

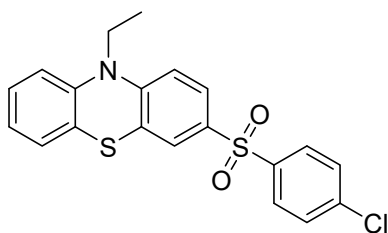

92.6mg, 77% yield; Yellow solid; mp 161.2-162.5 °C

(uncorrected); <sup>1</sup>H NMR (500 MHz, CDCl<sub>3</sub>) δ: 7.82 (d, *J*

= 10.0 Hz, 2H), 7.67-7.65 (m, 1H), 7.56 (d, *J* = 2.0 Hz,

1H), 7.42 (d, *J* = 10.0 Hz, 2H), 7.16-7.12 (m, 1H), 7.06-7.04 (m, 1H), 6.95-6.92 (m, 1H),

6.86-6.83 (m, 2H), 3.92-3.88 (m, 2H), 1.38 (t, *J* = 7.5 Hz, 3H); <sup>13</sup>C NMR (125MHz,

CDCl<sub>3</sub>) δ: 149.5, 142.9, 140.6, 139.4, 133.7, 129.5, 128.7, 127.7, 127.4, 127.4, 126.2,

125.2, 123.6, 122.8, 115.6, 114.5, 42.3, 12.7; LRMS (EI, 70eV) m/z (%):303 (M<sup>+</sup>+2, 1),

401 (M<sup>+</sup>, 3), 345 (100), 168 (58), 153 (22); IR (neat, cm<sup>-1</sup>): 3058, 2976, 1732, 1564, 1461,

1319, 1157, 1475, 1307, 1145, 1086, 821, 756; HRMS m/z (ESI) calcd for

$C_{20}H_{16}^{35}ClNO_2S_2$  ( $[M+H]^+$ ) 402.0384, found: 402.0392.

**2-((4-Chlorophenyl)sulfonyl)-10,11-dihydro-5H-dibenzo[b,f]azepine (3pa):**

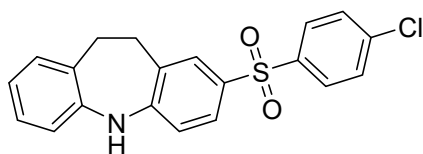

34.7mg, 32% yield; Yellow solid; mp 156.5-158.1 °C

(uncorrected);  $^1H$  NMR (500 MHz,  $CDCl_3$ )  $\delta$ : 8.95 (s,

1H), 7.88-7.86 (m, 1H), 7.80 (d,  $J = 10.0$  Hz, 2H), 7.39 (d,  $J = 10.0$  Hz, 2H), 7.24-7.22

(m, 1H), 7.16-7.12 (m, 1H), 7.02-7.00 (m, 1H), 6.92-6.90 (m, 1H), 6.86-6.81 (m, 2H),

3.07 (t,  $J = 5.0$  Hz, 2H), 2.97 (t,  $J = 5.0$  Hz, 2H);  $^{13}C$  NMR (125MHz,  $CDCl_3$ )  $\delta$ : 142.2,

140.6, 140.3, 139.8, 136.5, 132.8, 130.7, 129.5, 128.6, 128.4, 128.2, 127.1, 124.5, 120.4,

119.2, 118.9, 35.4, 34.7; LRMS (EI, 70eV)  $m/z$  (%): 371 ( $M^+ + 2$ , 33), 369 ( $M^+$ , 100), 193

(34), 165 (13), 89 (7); IR (neat,  $cm^{-1}$ ): 3355, 3015, 2921, 2851, 1581, 1464, 1340, 1282,

1088, 866, 754; HRMS  $m/z$  (ESI) calcd for  $C_{20}H_{16}^{35}ClNO_2S$  ( $[M+H]^+$ ) 370.0663, found:

370.0674.

**4-((4-Chlorophenyl)sulfonyl)-10,11-dihydro-5H-dibenzo[b,f]azepine(3pa):**

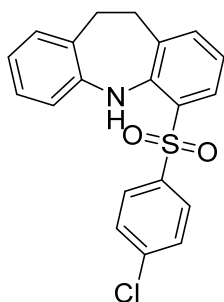

16.6 mg, 15% yield; Yellow solid; mp 153.2-155.1 °C (uncorrected);

$^1H$  NMR (500 MHz,  $CDCl_3$ )  $\delta$ : 7.84 (d,  $J = 10.0$  Hz, 2H), 7.59-7.53

(m, 2H), 7.42 (d,  $J = 10.0$  Hz, 2H), 7.11-7.04 (m, 2H), 6.85 (t,  $J =$

7.5 Hz, 1H), 6.80-6.76 (m, 2H), 6.58 (s, 1H), 3.05-3.01 (m, 4H);

$^{13}C$  NMR (125MHz,  $CDCl_3$ )  $\delta$ : 146.8, 141.2, 140.4, 139.1, 130.8, 130.4, 129.7, 129.4,

129.1, 128.6, 127.5, 127.1, 126.8, 121.2, 118.8, 118.1, 35.5, 34.5; IR (neat,  $cm^{-1}$ ):

3344, 3081, 2904, 2846, 1582, 1491, 1352, 1135, 1098, 826, 752; HRMS  $m/z$  (ESI)

calcd for  $C_{20}H_{16}^{35}ClNO_2S$  ( $[M+H]^+$ ) 370.0663, found: 370.0672.



---

**2,6-bis((4-chlorophenyl)sulfonyl)-4-methoxy-N,N-dimethylaniline(4aa):**

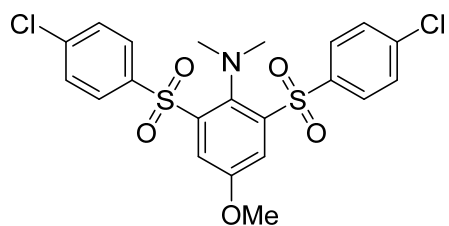

18.0mg, 12%; White solid; mp 157.2-158.1 °C

(uncorrected); <sup>1</sup>H NMR (500 MHz, CDCl<sub>3</sub>) δ: 7.78

(s, 2H), 7.74 (d, *J* = 8.5 Hz, 4H), 7.59 (d, *J* = 8.5

Hz, 4H), 3.90 (s, 3H), 2.25 (s, 6H); <sup>13</sup>C NMR (125MHz, CDCl<sub>3</sub>) δ: 156.7, 144.9, 142.6,

139.9, 139.8, 129.4, 128.7, 121.1, 56.4, 43.1; IR (neat, cm<sup>-1</sup>): 3075, 2945, 2831, 2794,

1906, 1578, 1492, 1291, 1265, 1158, 1081, 864; HRMS *m/z* (ESI) calcd for

C<sub>21</sub>H<sub>19</sub><sup>35</sup>Cl<sub>2</sub>NO<sub>5</sub>S<sub>2</sub> ([M+H]<sup>+</sup>) 500.0160, found 500.0167.

**Notes and references:**

(a) T. C. Johnson, Bryony L. Elbert, A. J. M. Farley, T. W. Gorman, C. Genicot, B. Lallemand, P. Pasau, J. Flasz, J. L. Castro, M. MacCoss, D. J. Dixon, R. S. Paton, C. J. Schofield, M. D. Smith and M. C. Willis, *Chem. Sci.*, 2018, **9**, 629;

(b) K. Zhou, J. Zhang, L. Lai, J. Cheng, J. Sun and J. Wu, *Chem. Commun.*, 2018, **54**, 7459.

## (C) Spectra

### 2-((4-Chlorophenyl)sulfonyl)-4-methoxy-*N,N*-dimethylaniline(3aa):

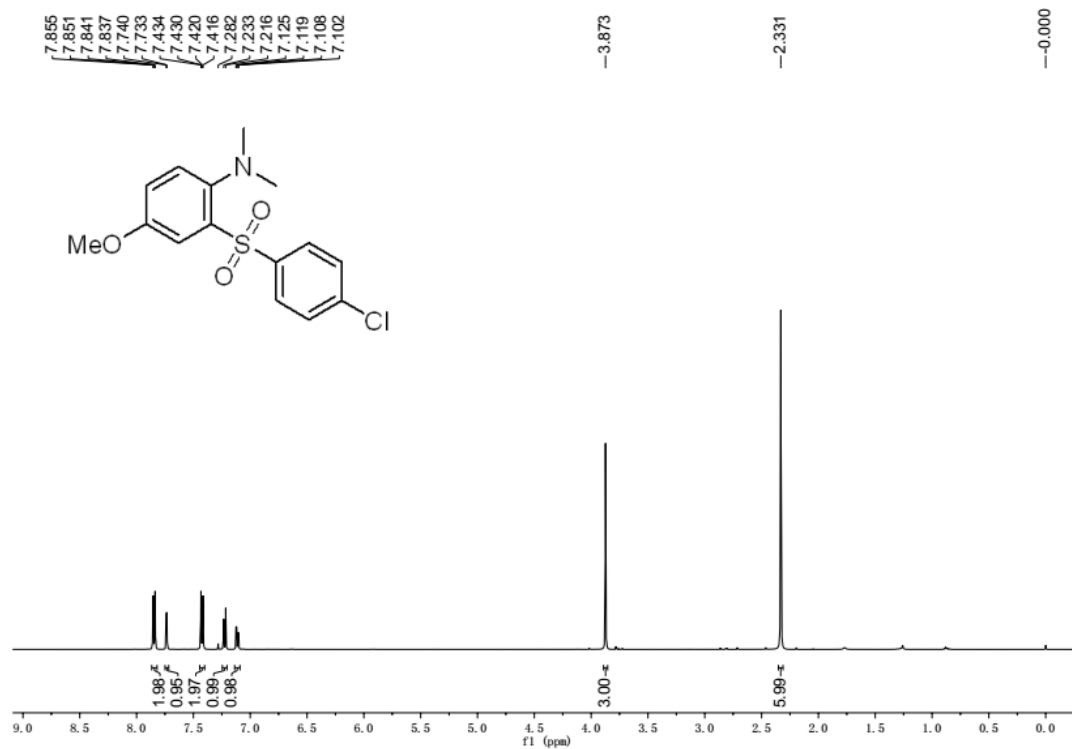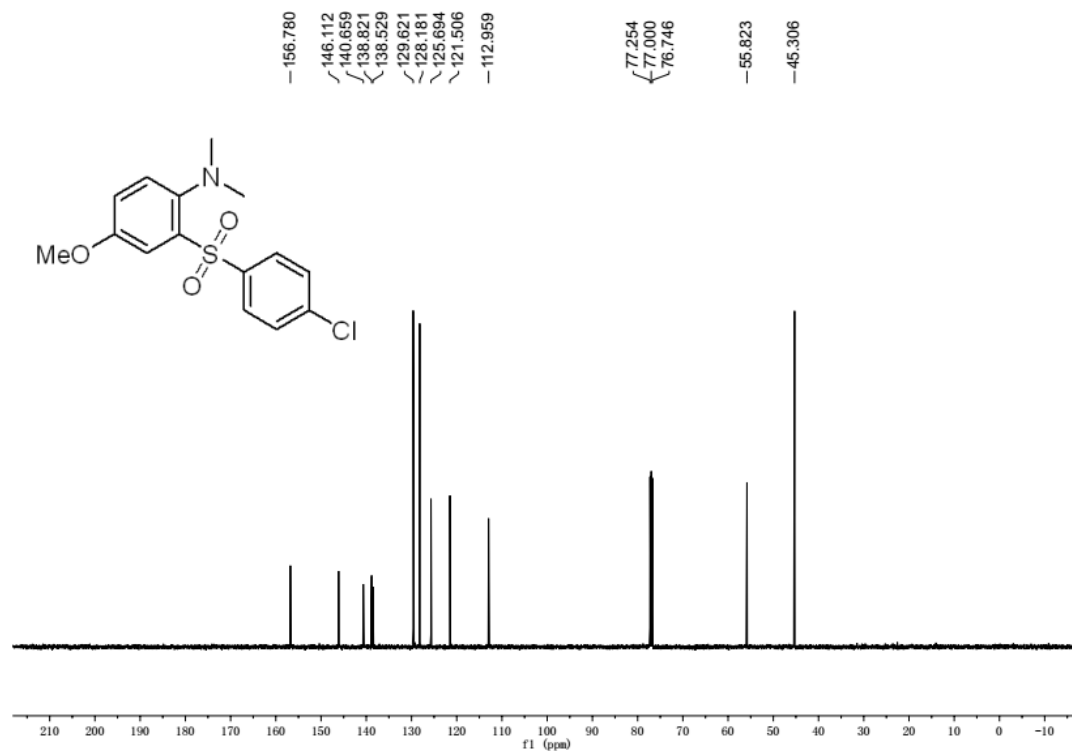

4-Methoxy-*N,N*-dimethyl-2-(phenylsulfonyl)aniline (3ab):

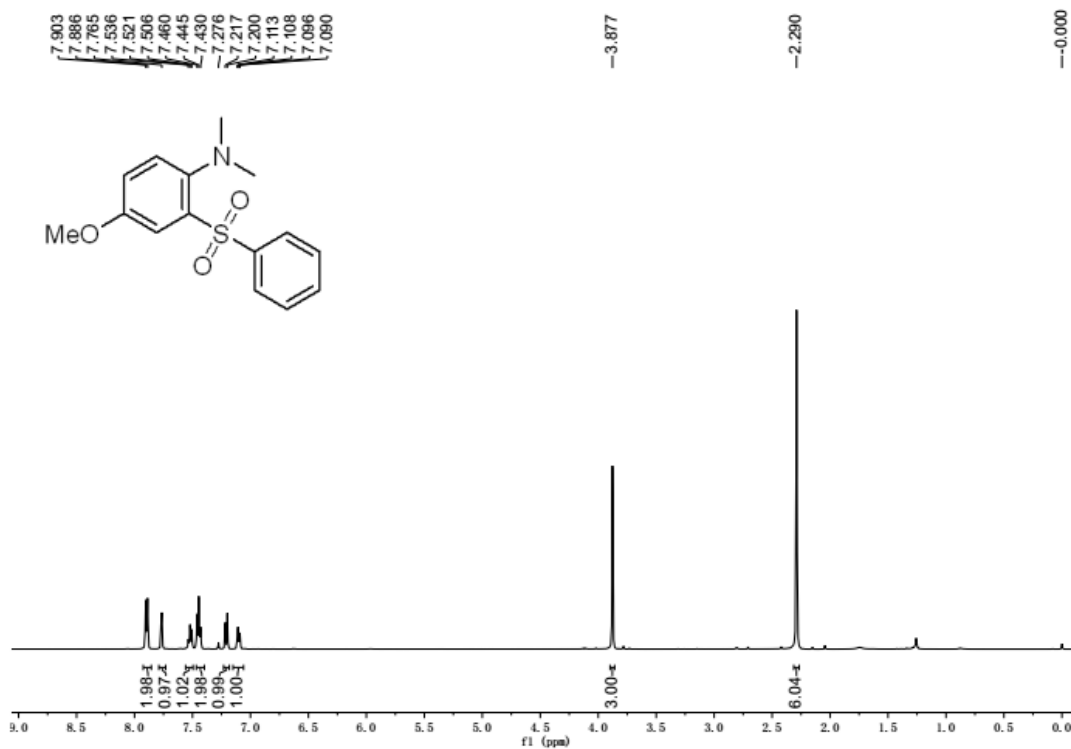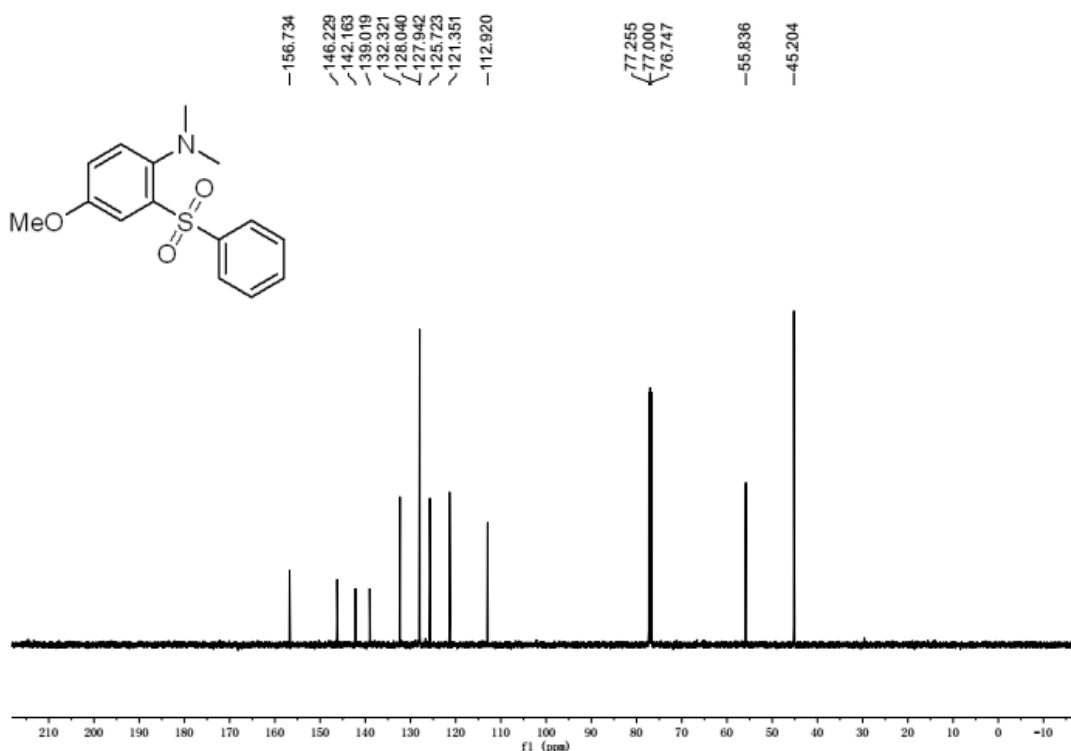

4-Methoxy-N,N-dimethyl-2-tosylaniline (3ac):

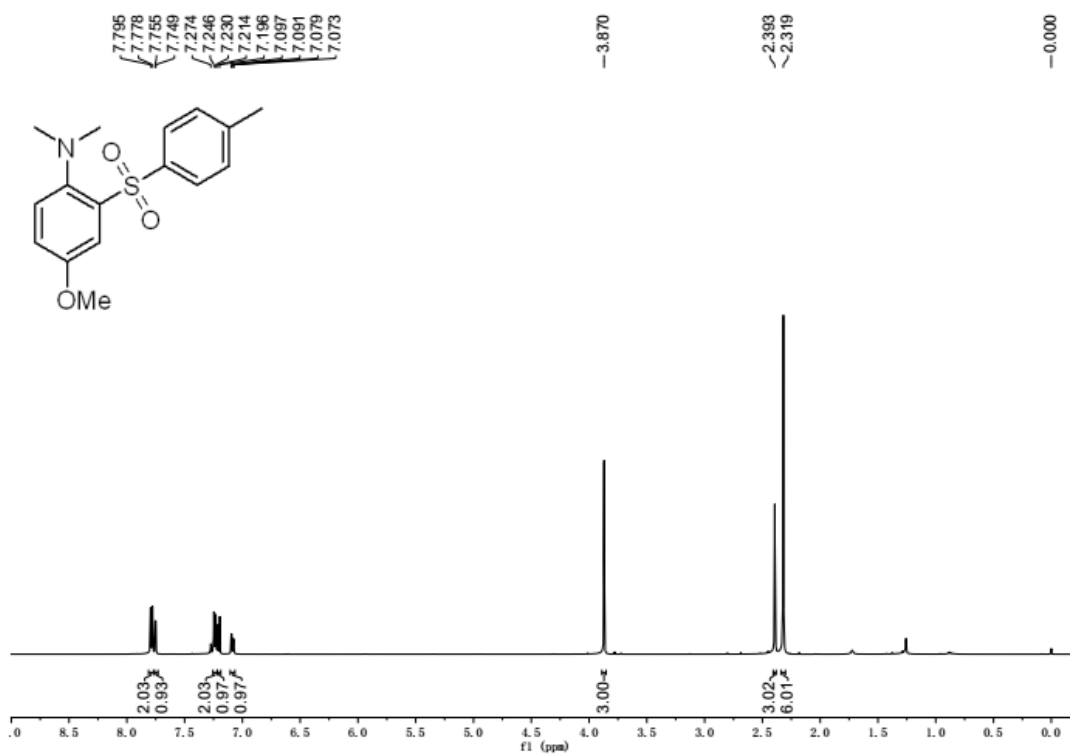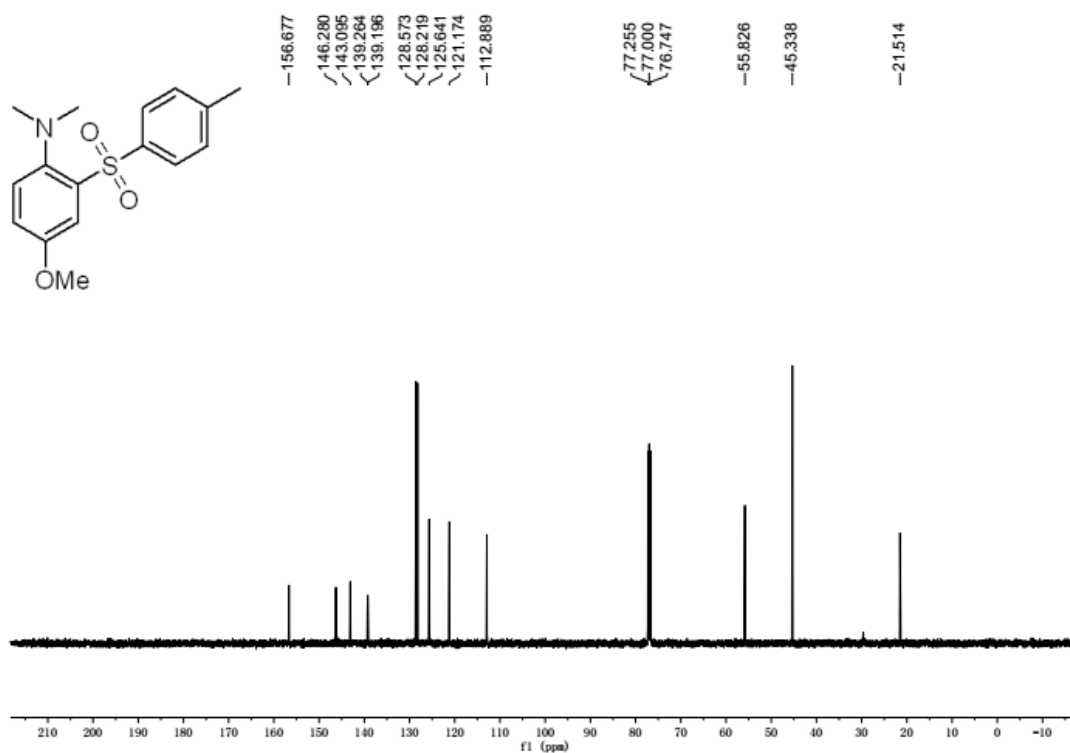

**4-Methoxy-2-((4-methoxyphenyl)sulfonyl)-*N,N*-dimethylaniline (3ad):**

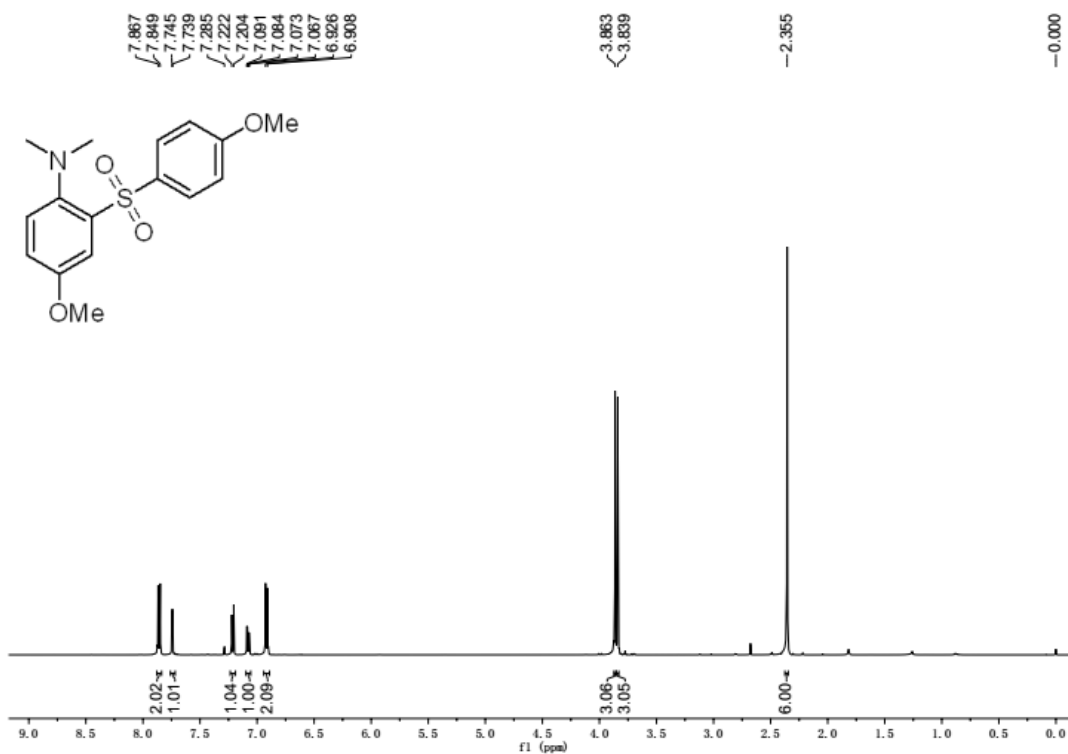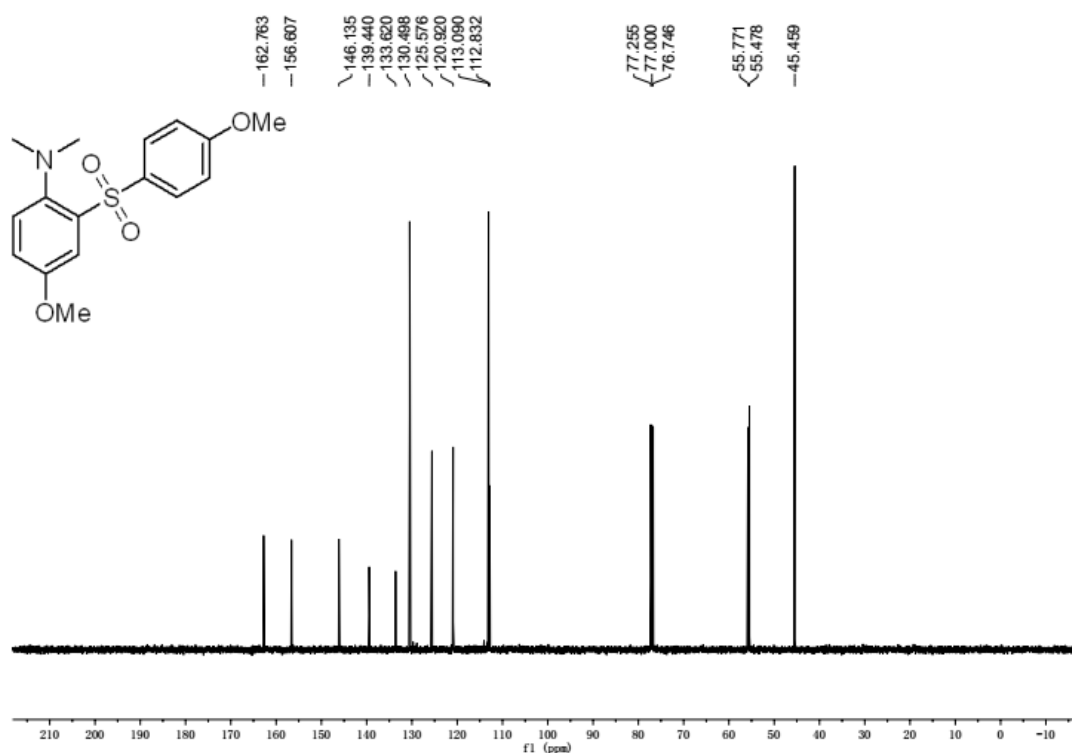

2-((4-Bromophenyl)sulfonyl)-4-methoxy-*N,N*-dimethylaniline (3ae):

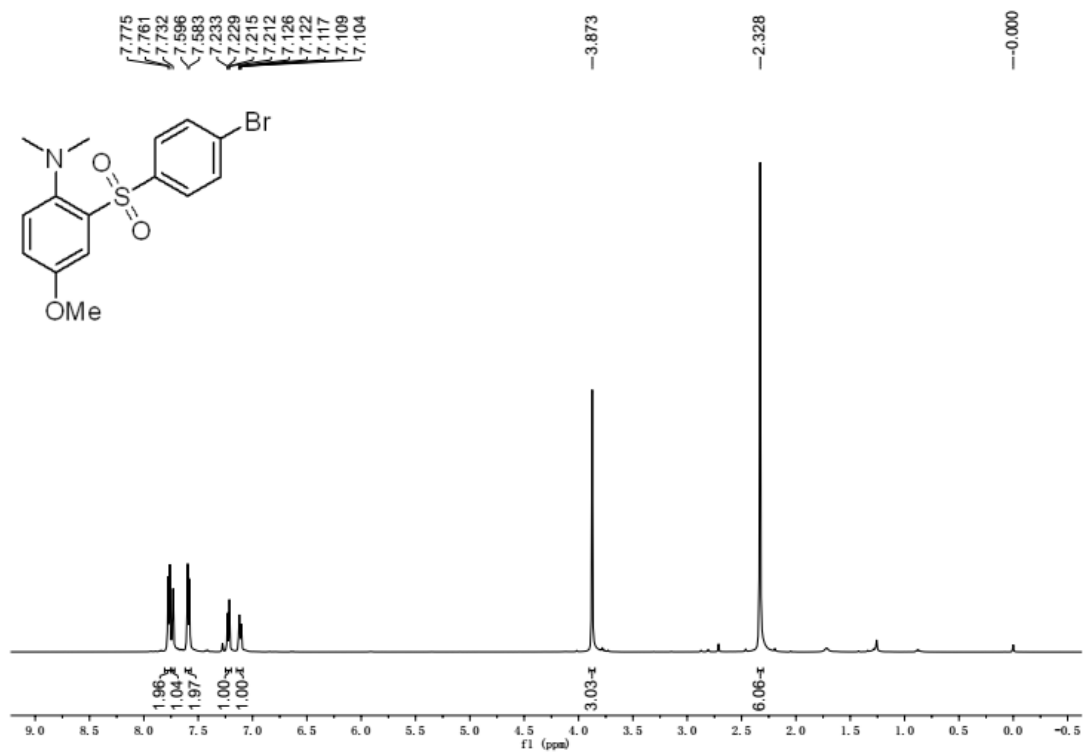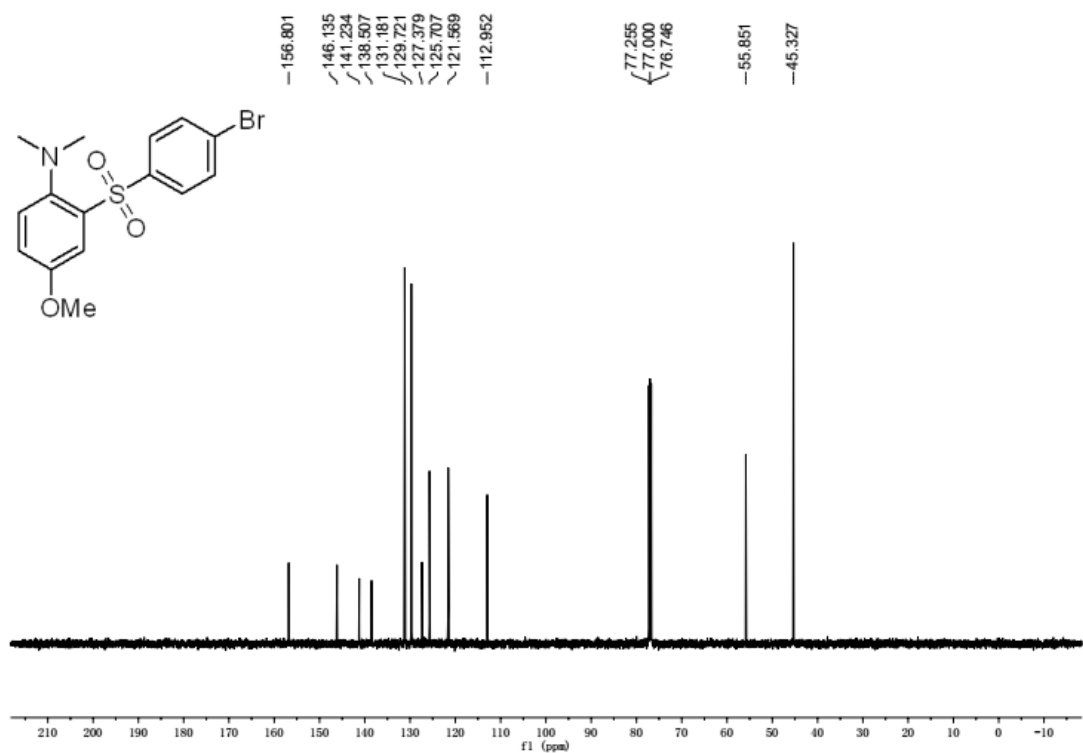

4-((2-(Dimethylamino)-5-methoxyphenyl)sulfonyl)benzonitrile (3af):

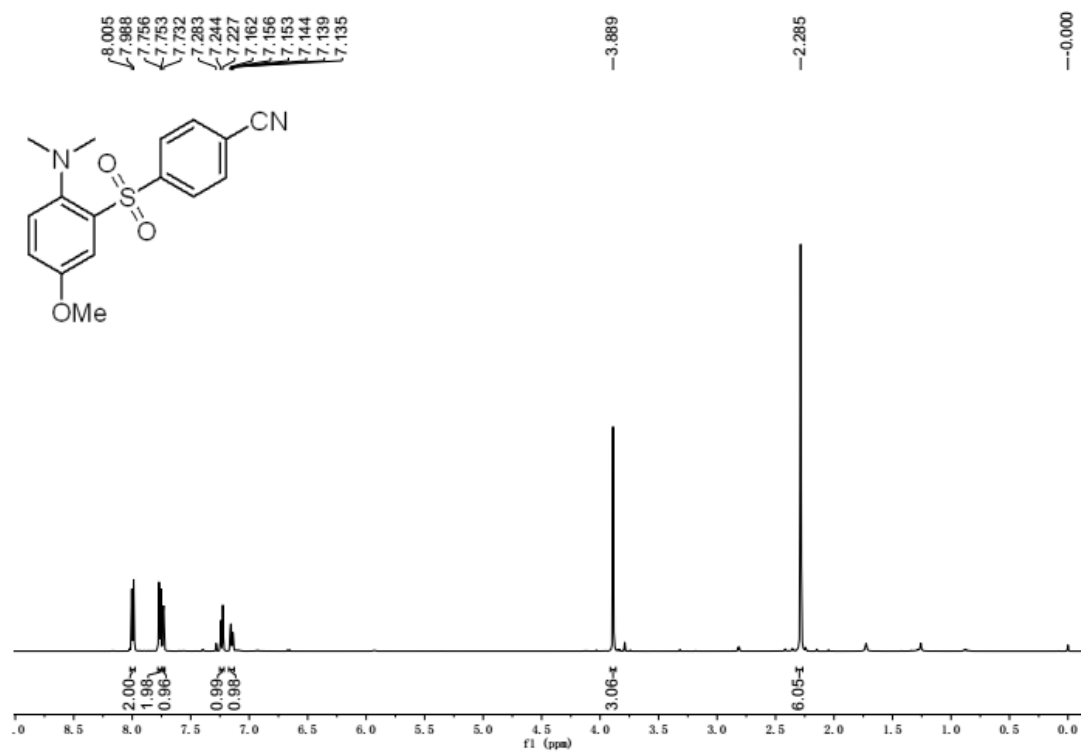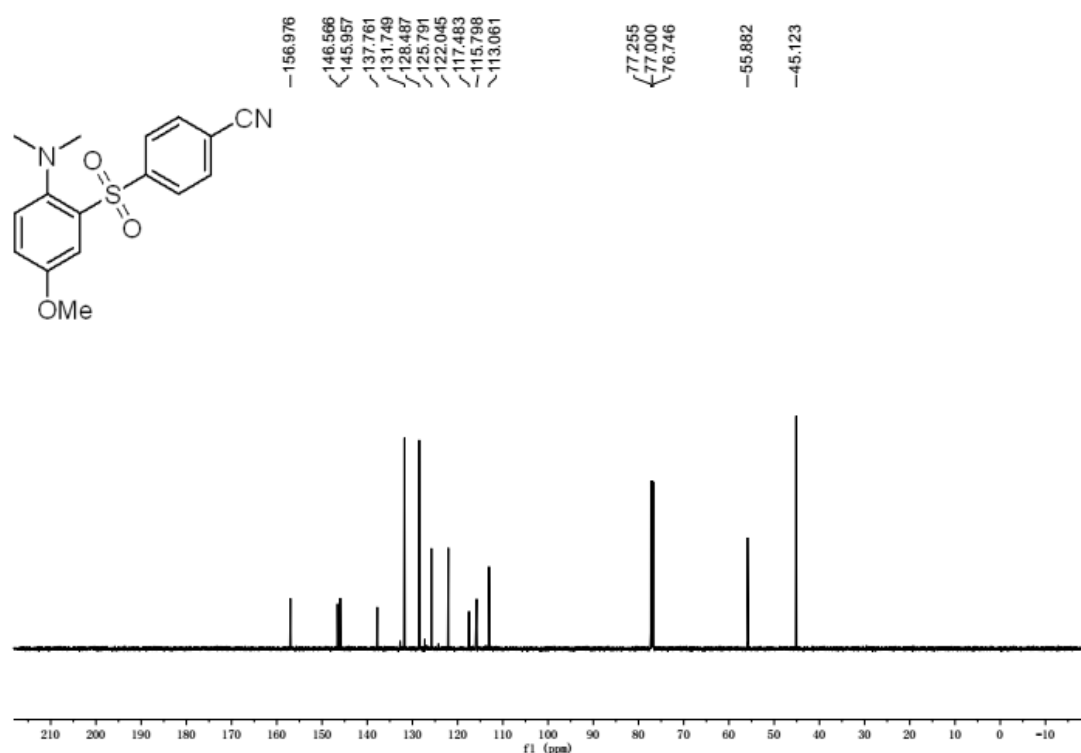

2-((3-Chlorophenyl)sulfonyl)-4-methoxy-*N,N*-dimethylaniline (3ag):

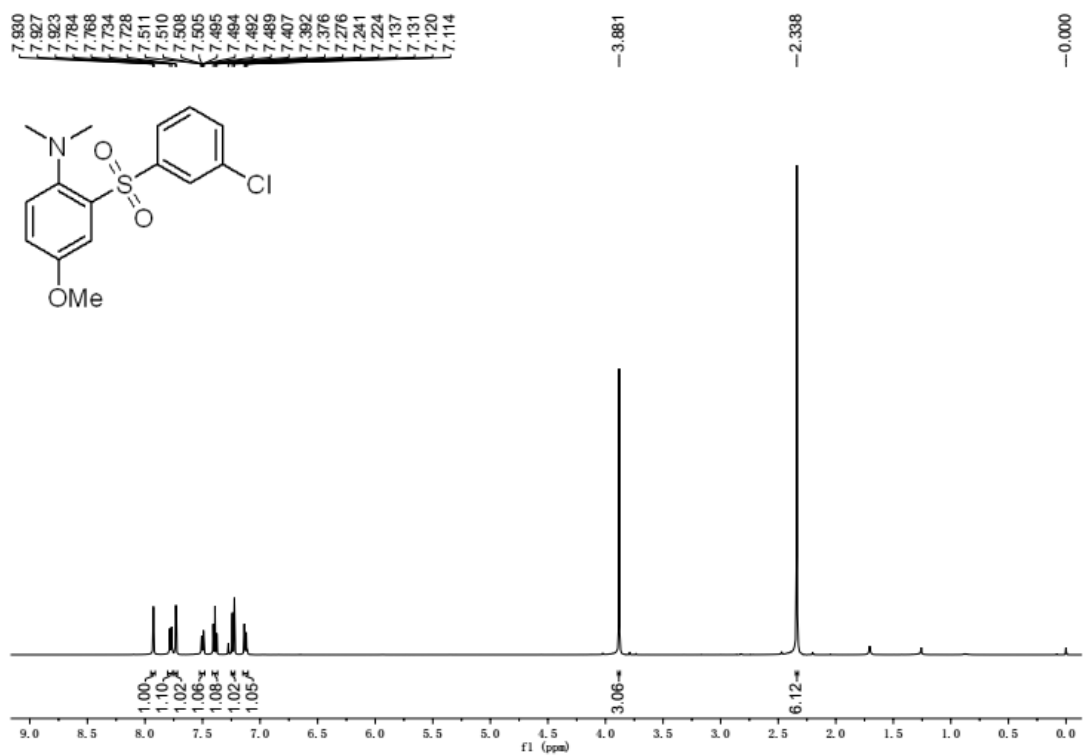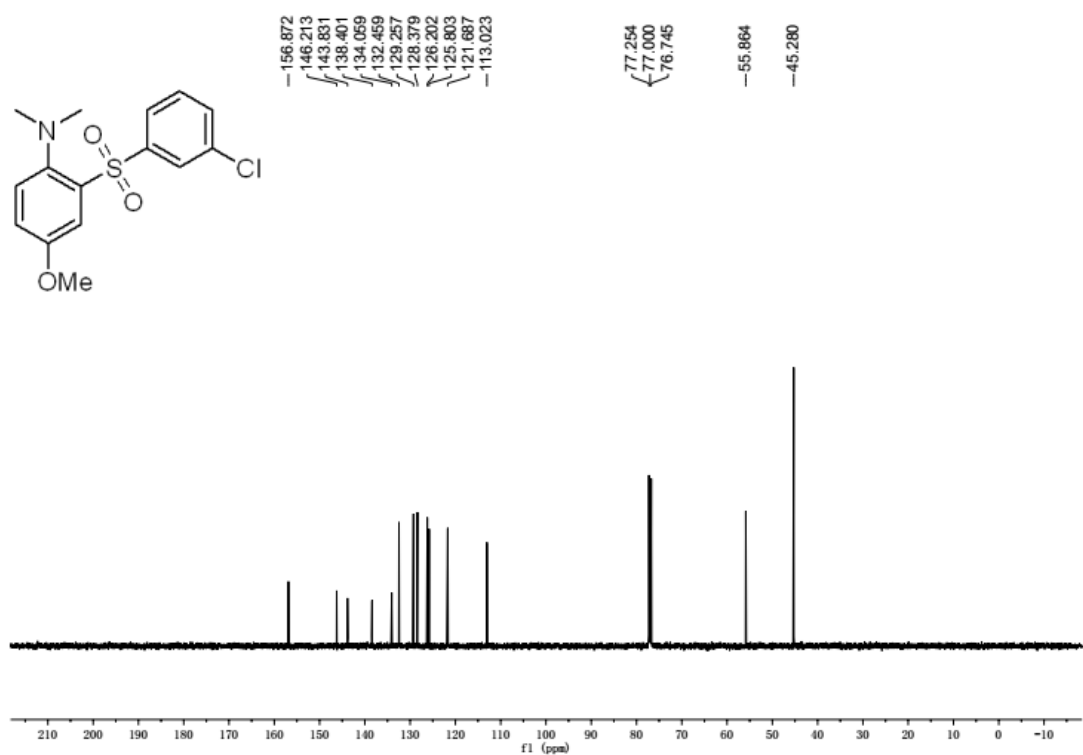



2-((2-Chlorophenyl)sulfonyl)-4-methoxy-*N,N*-dimethylaniline (3ah):

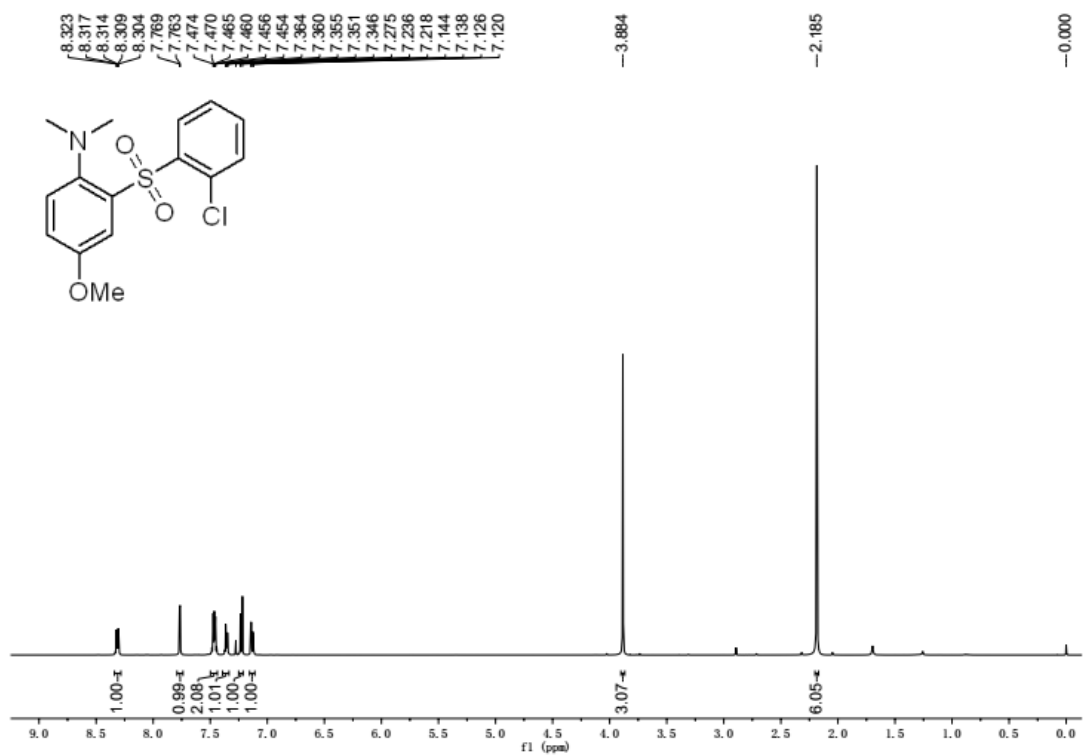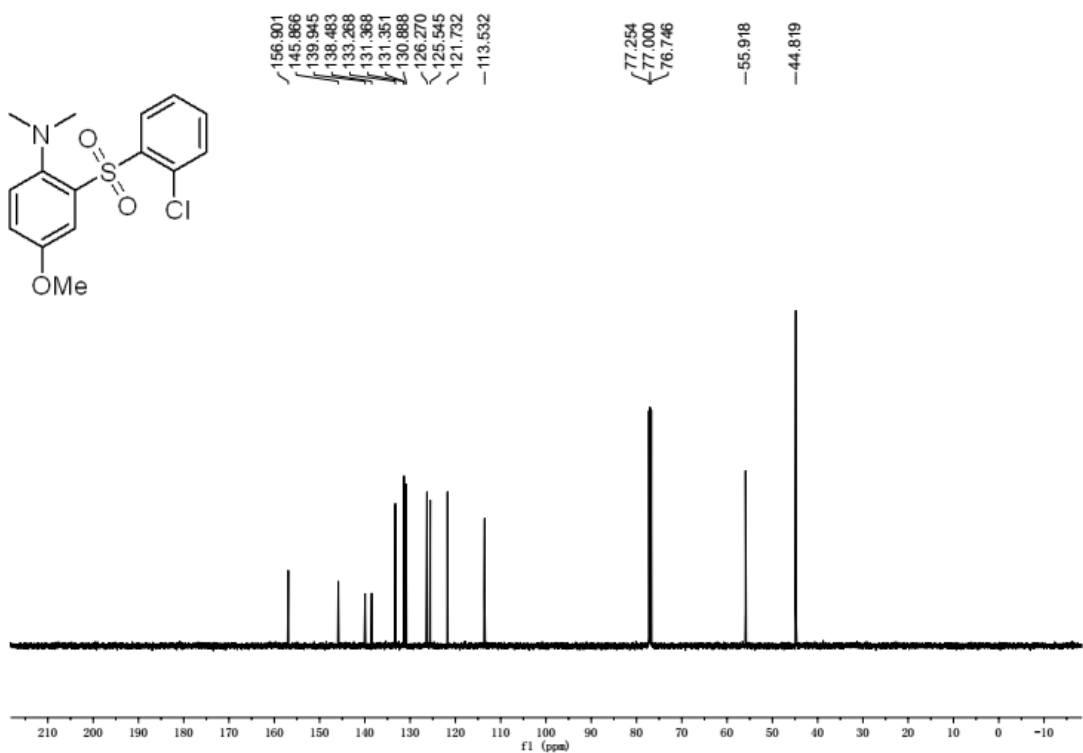

### 4-Methoxy-*N,N*-dimethyl-2-(naphthalen-2-ylsulfonyl)aniline (3ai):

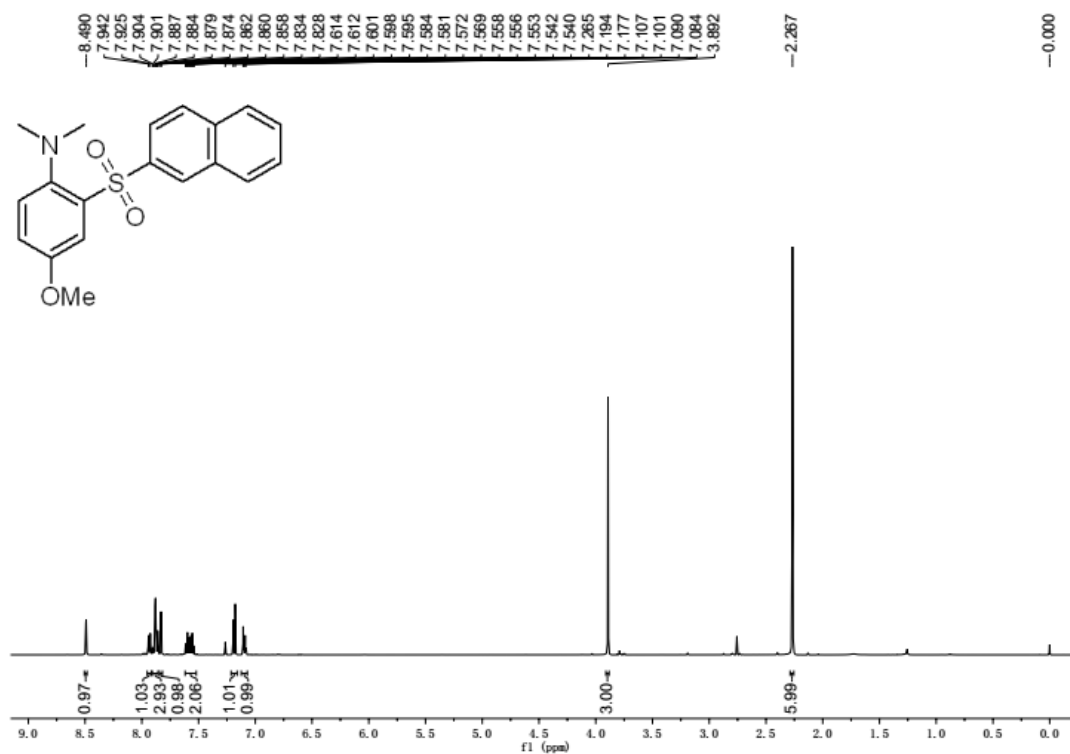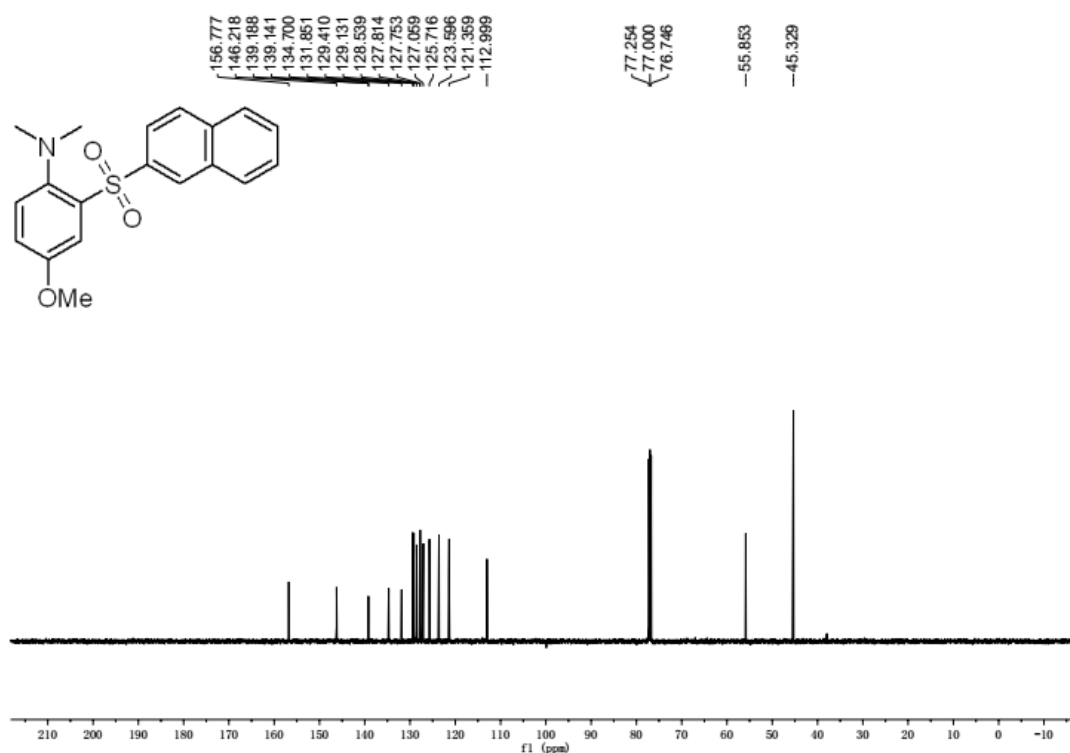

2-((2,6-Dichlorophenyl)sulfonyl)-4-methoxy-*N,N*-dimethylaniline (3aj):

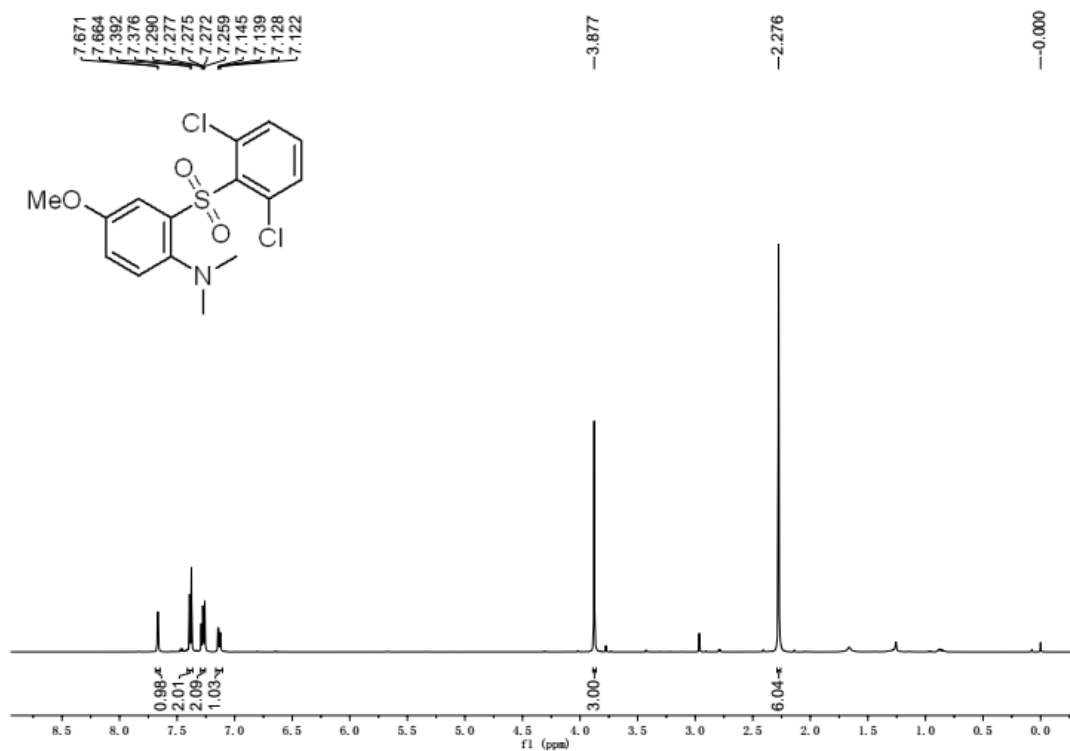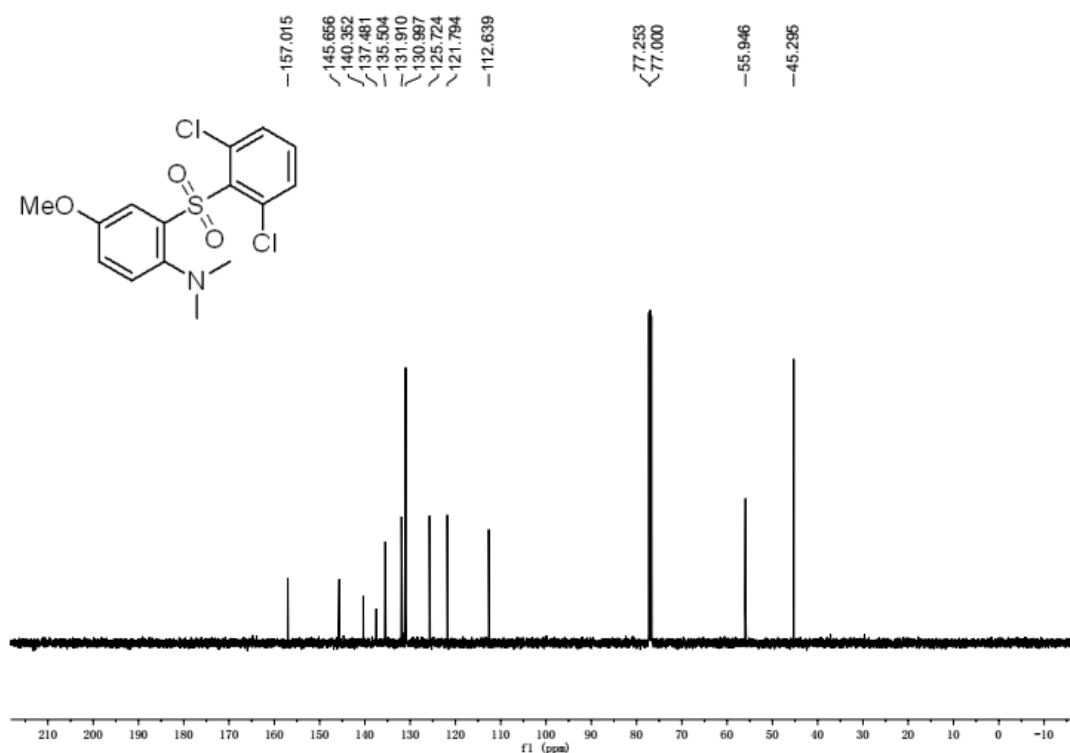

**4-Methoxy-*N,N*-dimethyl-2-((2,4,6-trichlorophenyl)sulfonyl)aniline (3ak):**

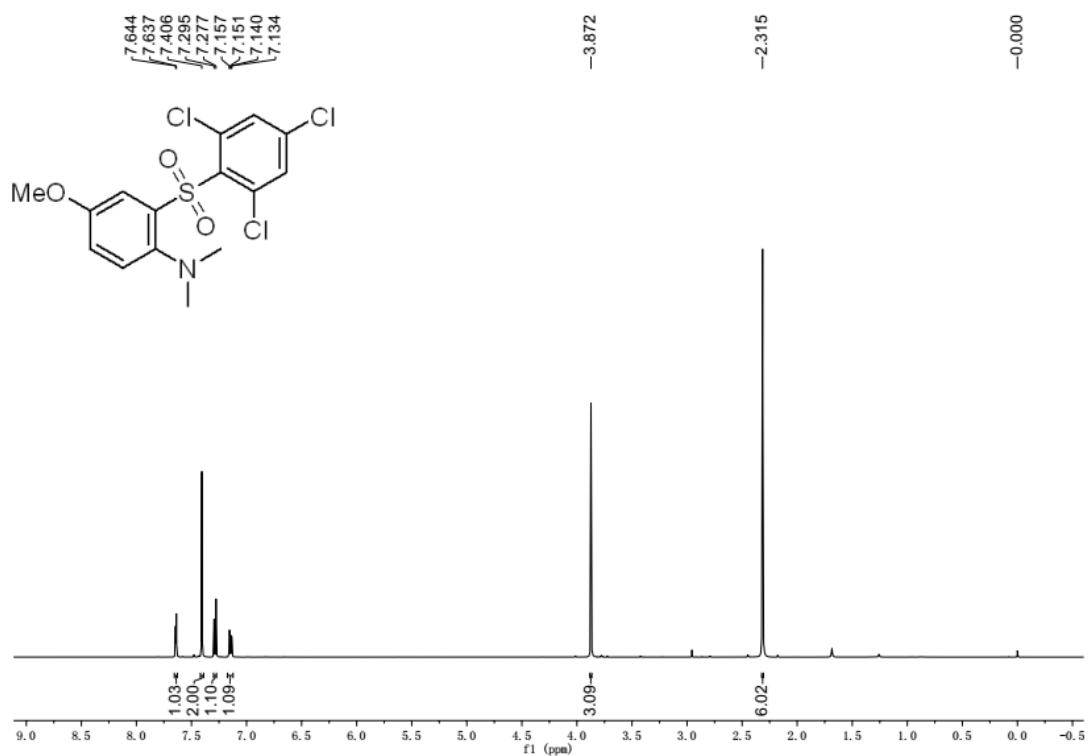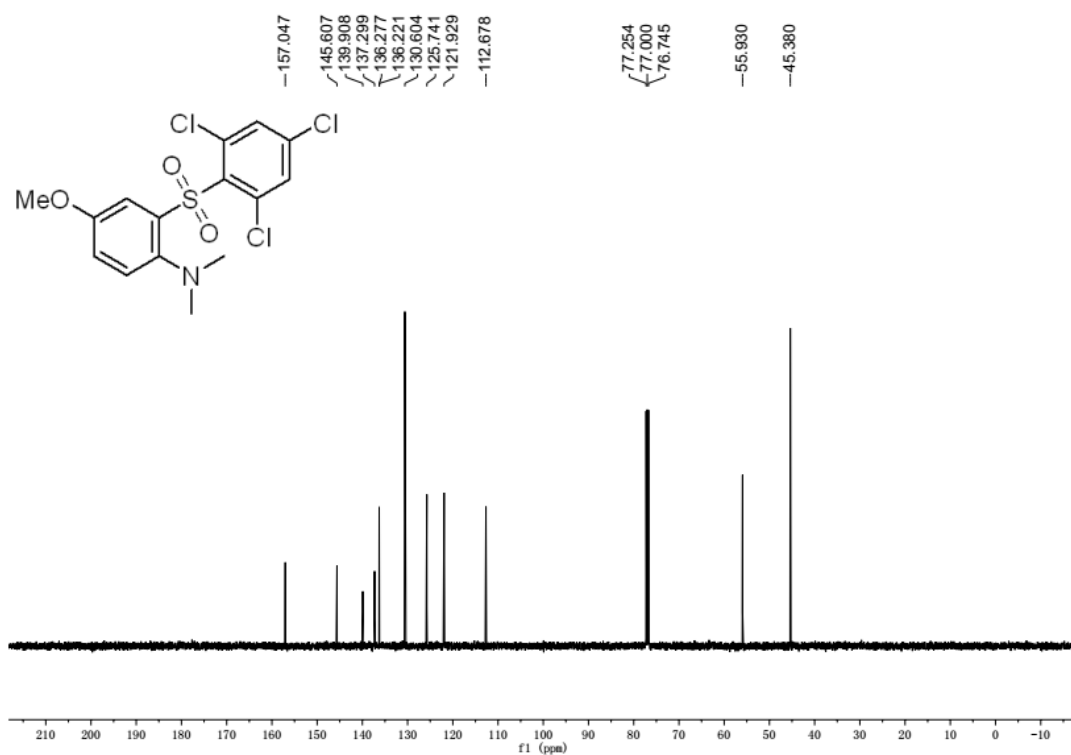

2-((2,3-Dihydrobenzofuran-5-yl)sulfonyl)-4-methoxy-*N,N*-dimethylaniline (3a):

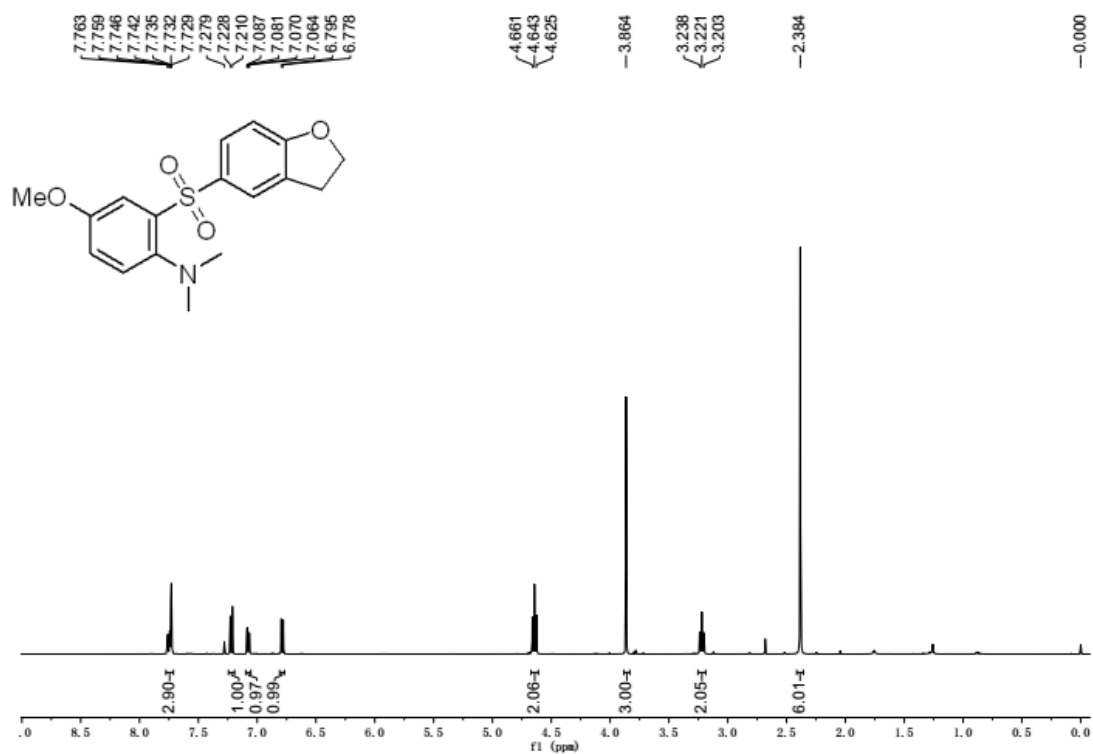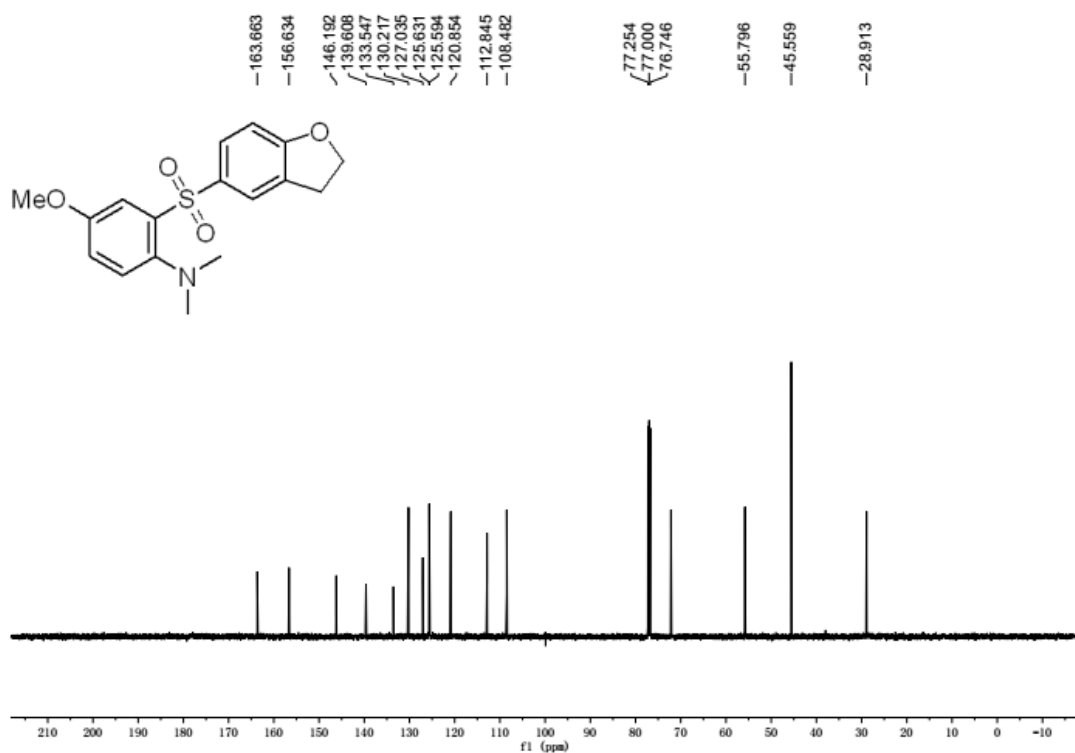

**4-Methoxy-*N,N*-dimethyl-2-(thiophen-2-ylsulfonyl)aniline(3am):**

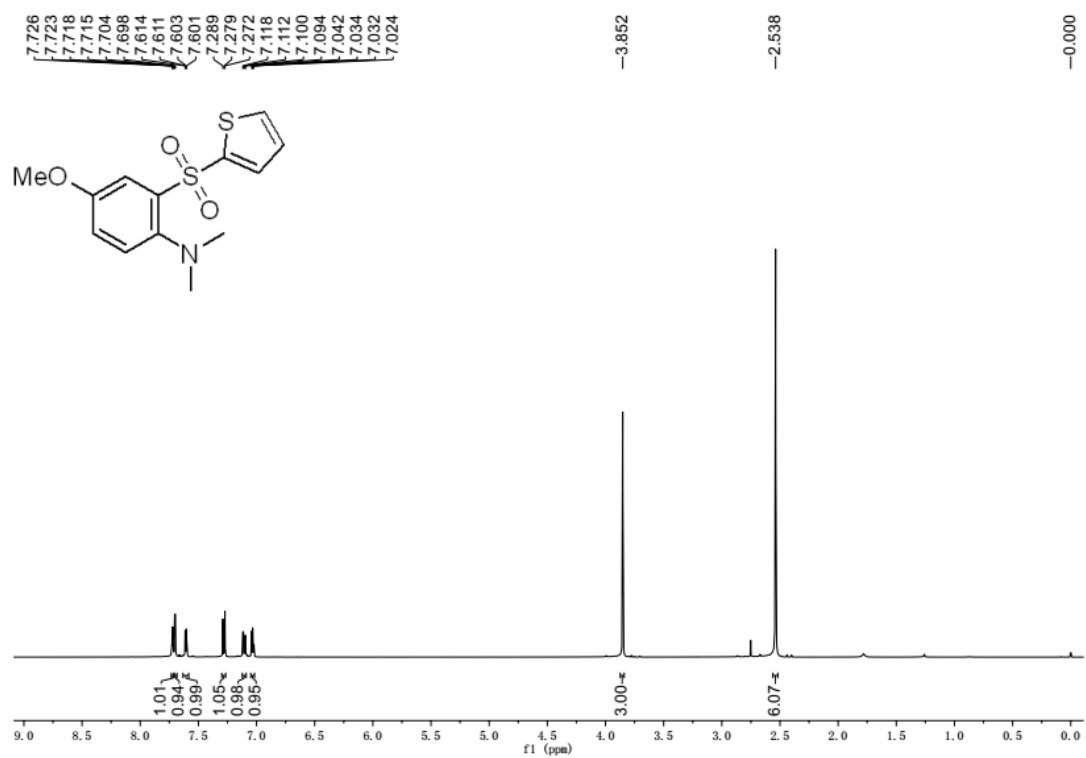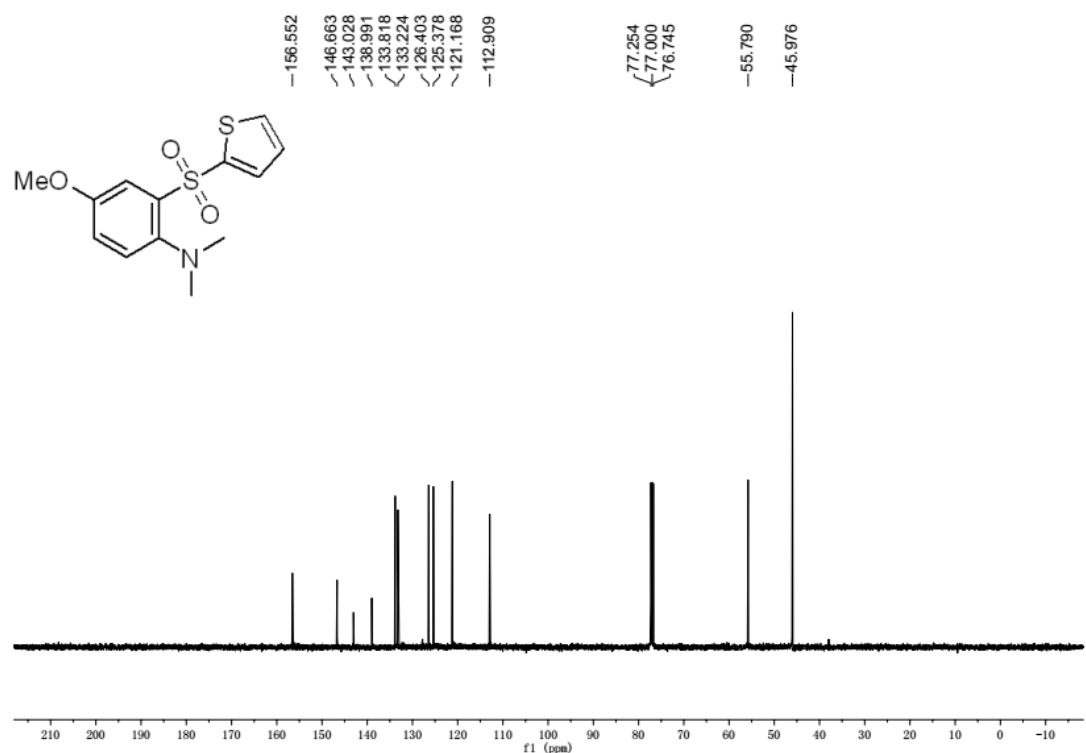

**4-Methoxy-N,N-dimethyl-2-(pyridin-3-ylsulfonyl)aniline(3an):**

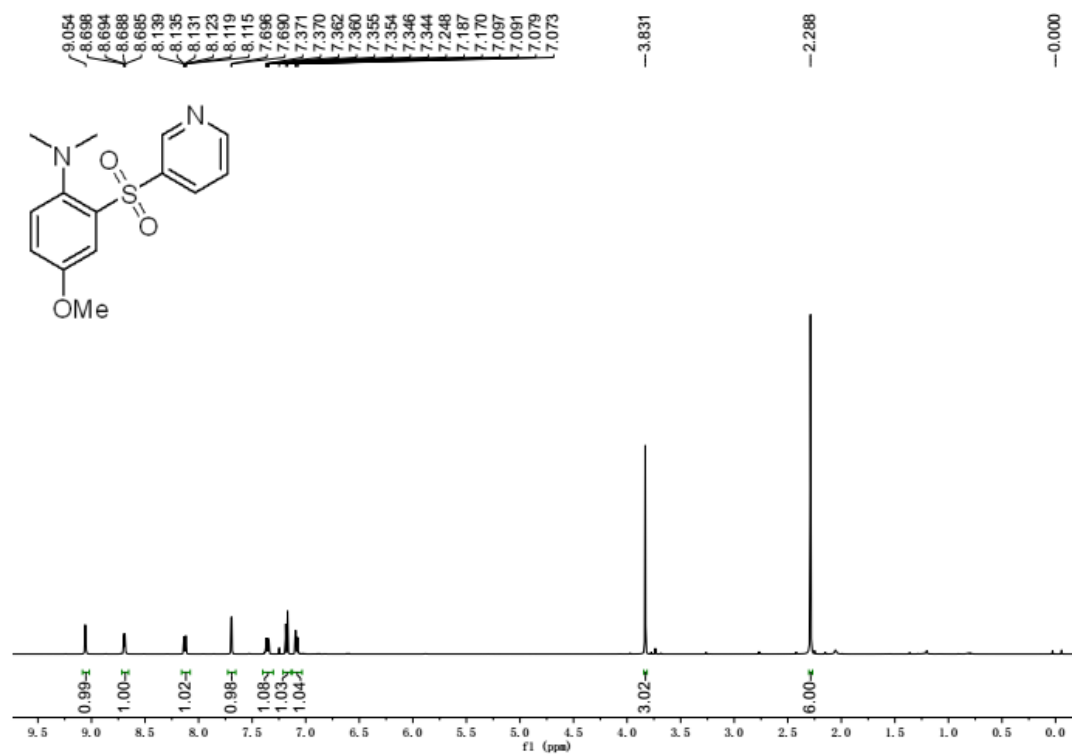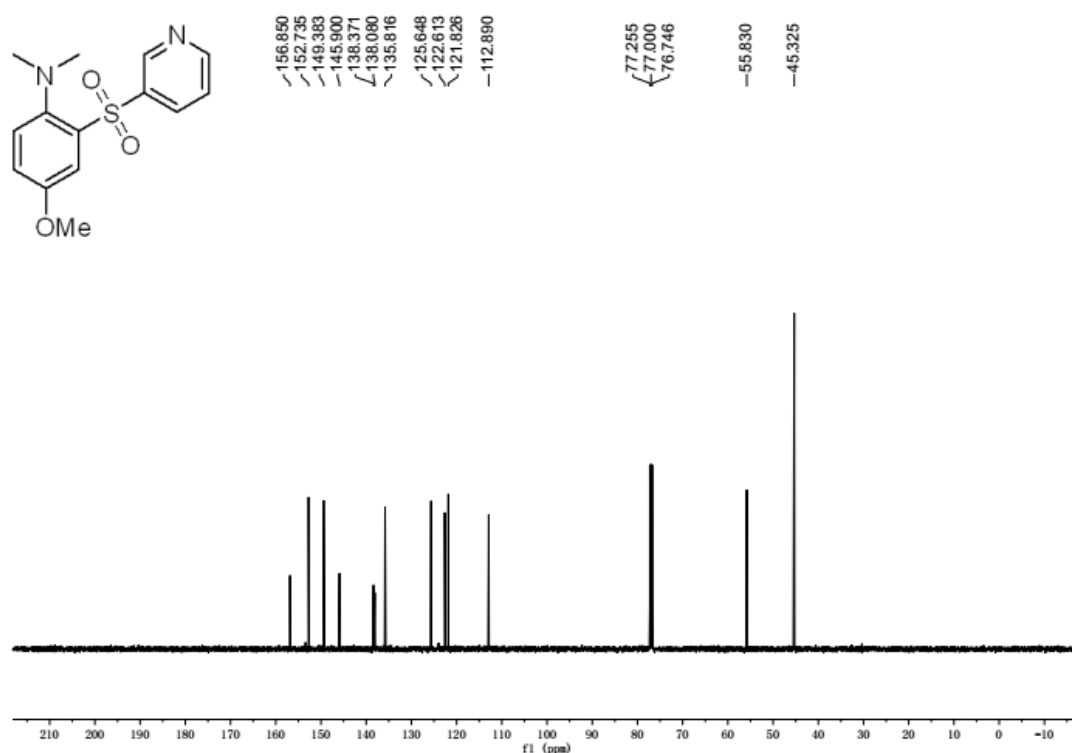

### 4-Methoxy-N,N-dimethyl-2-(methylsulfonyl)aniline(3ao):

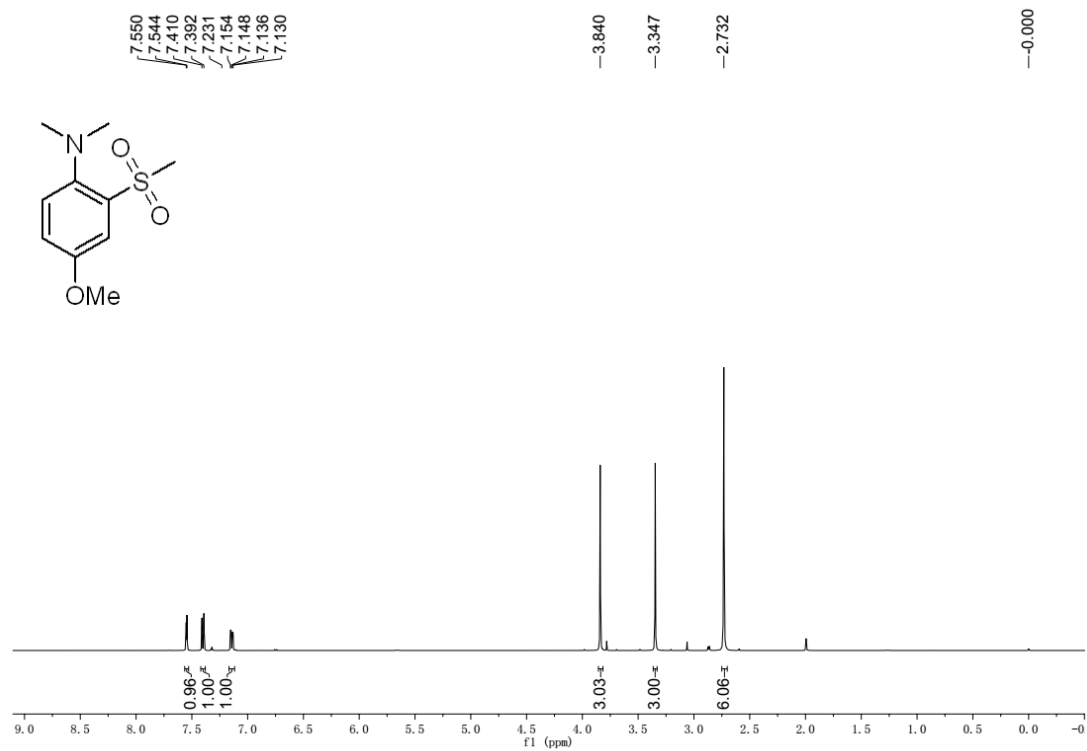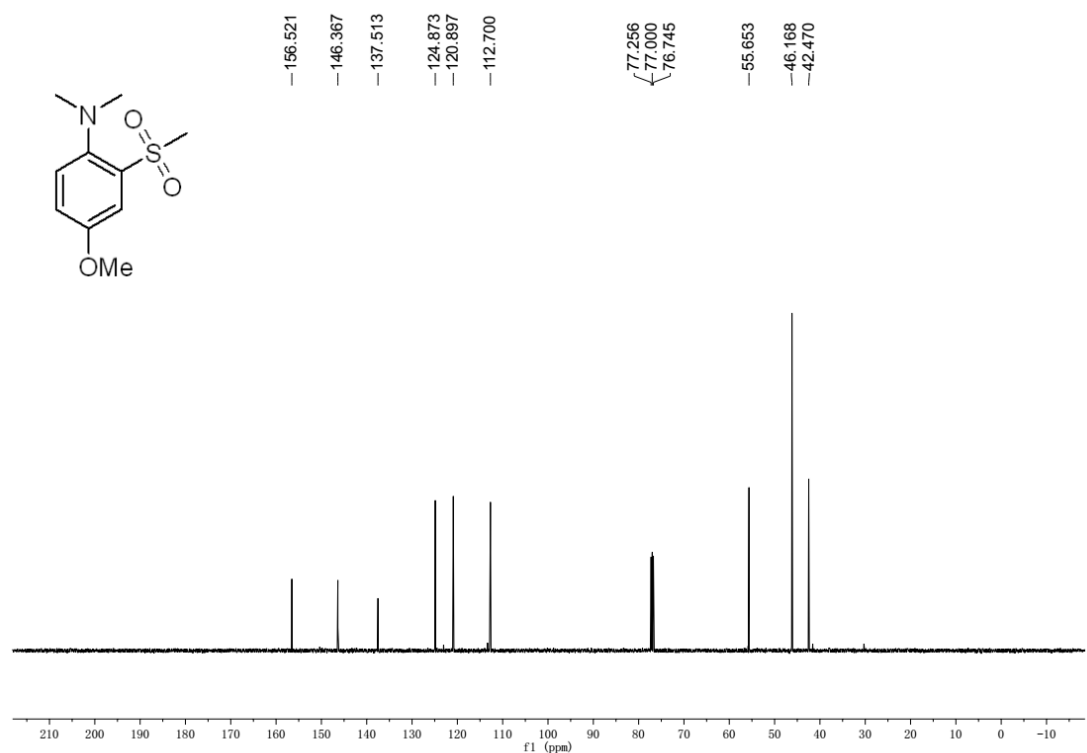



**2-(Cyclopropylsulfonyl)-4-methoxy-*N,N*-dimethylaniline (3ap):**

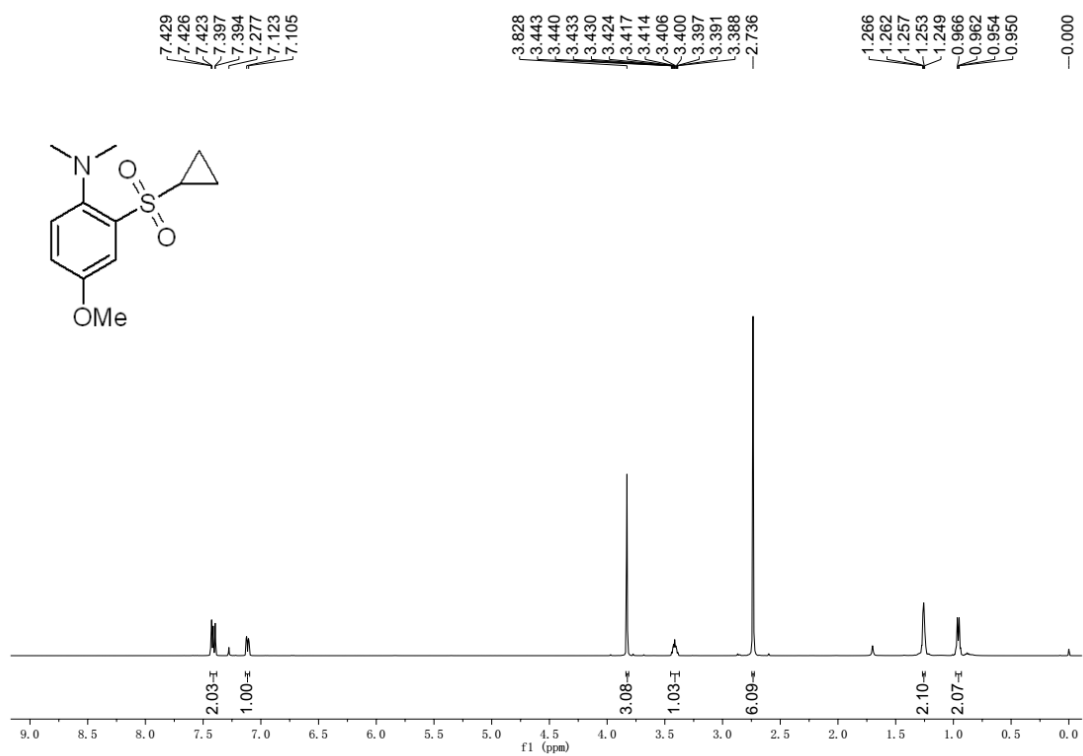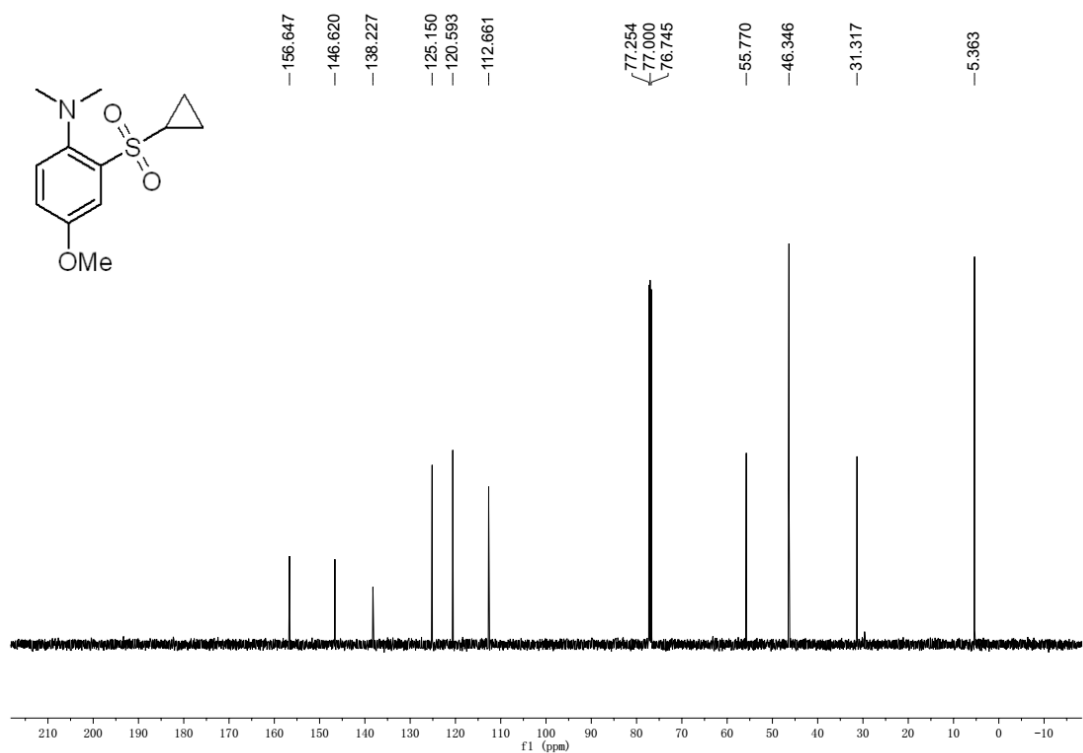

**Methyl 3-((2-(dimethylamino)-5-methoxyphenyl)sulfonyl)propanoate (3aq):**

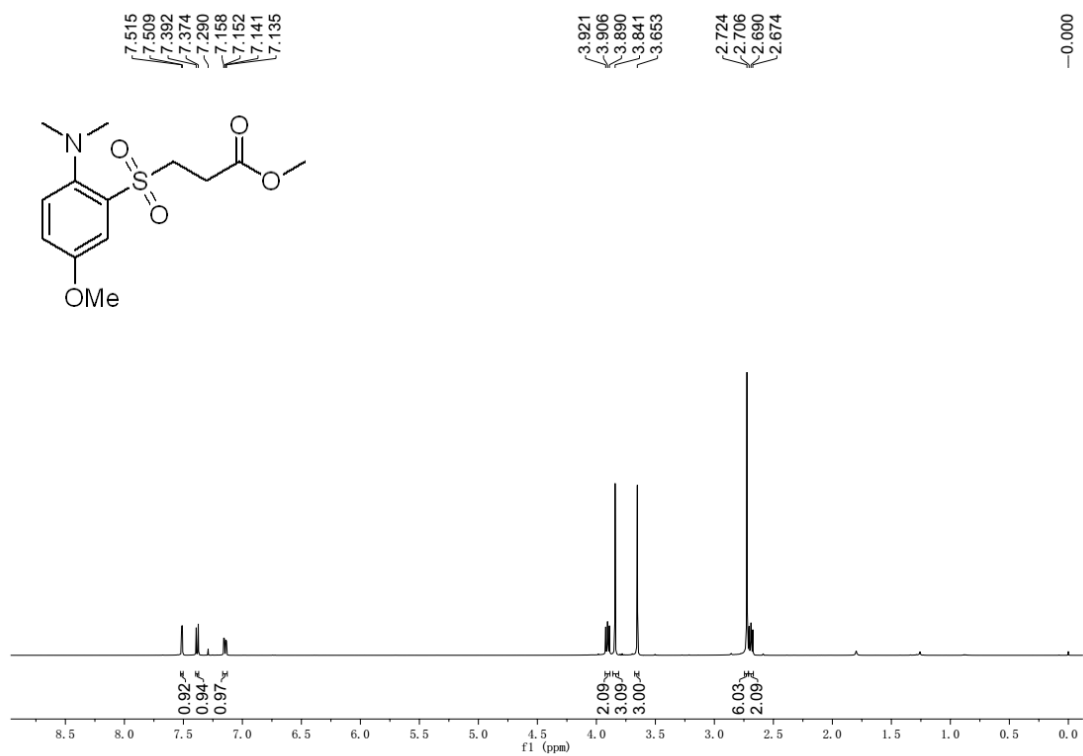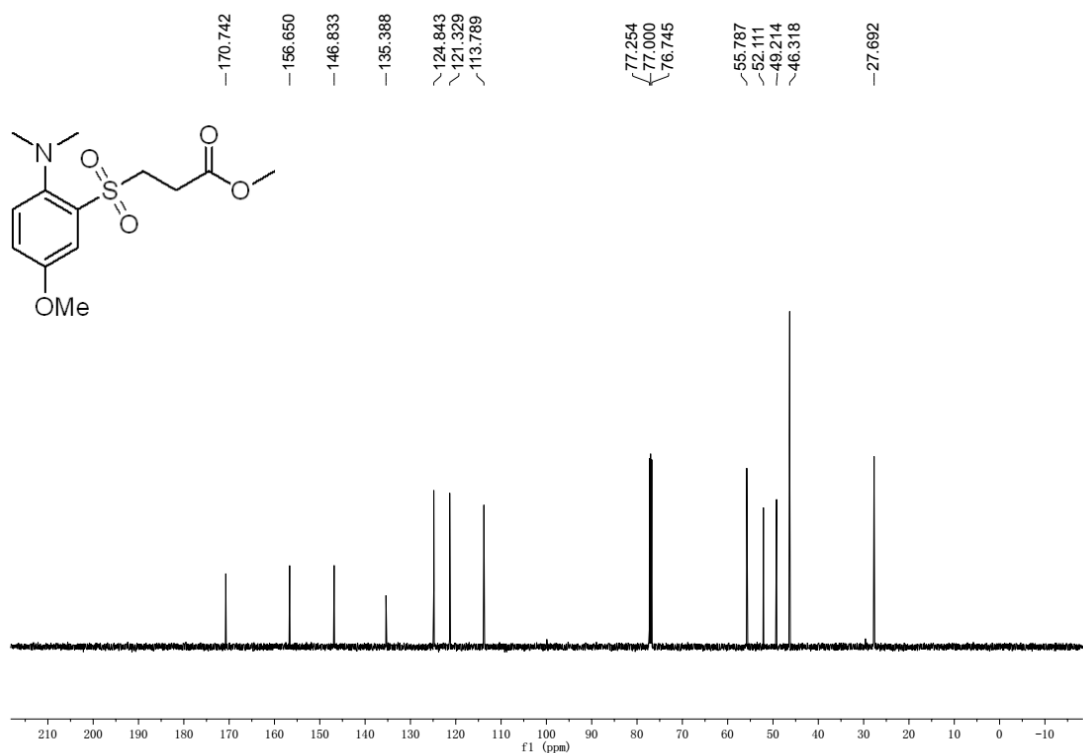

2-((4-Chlorophenyl)sulfonyl)-*N,N*,4-trimethylaniline(3ba):

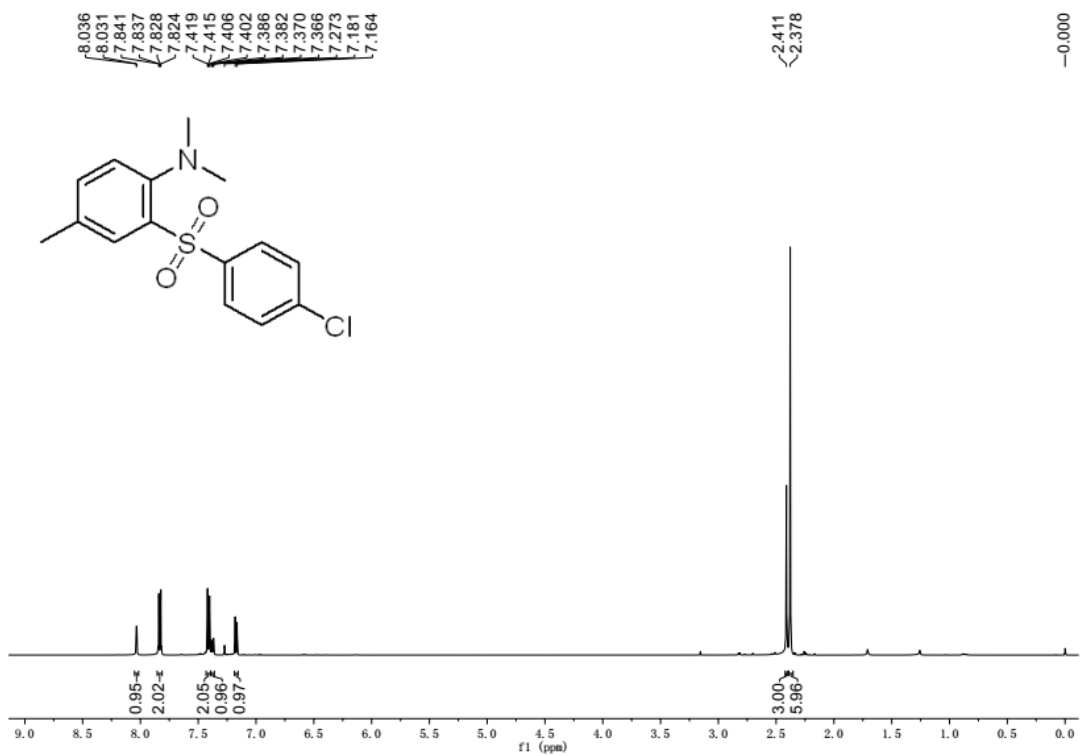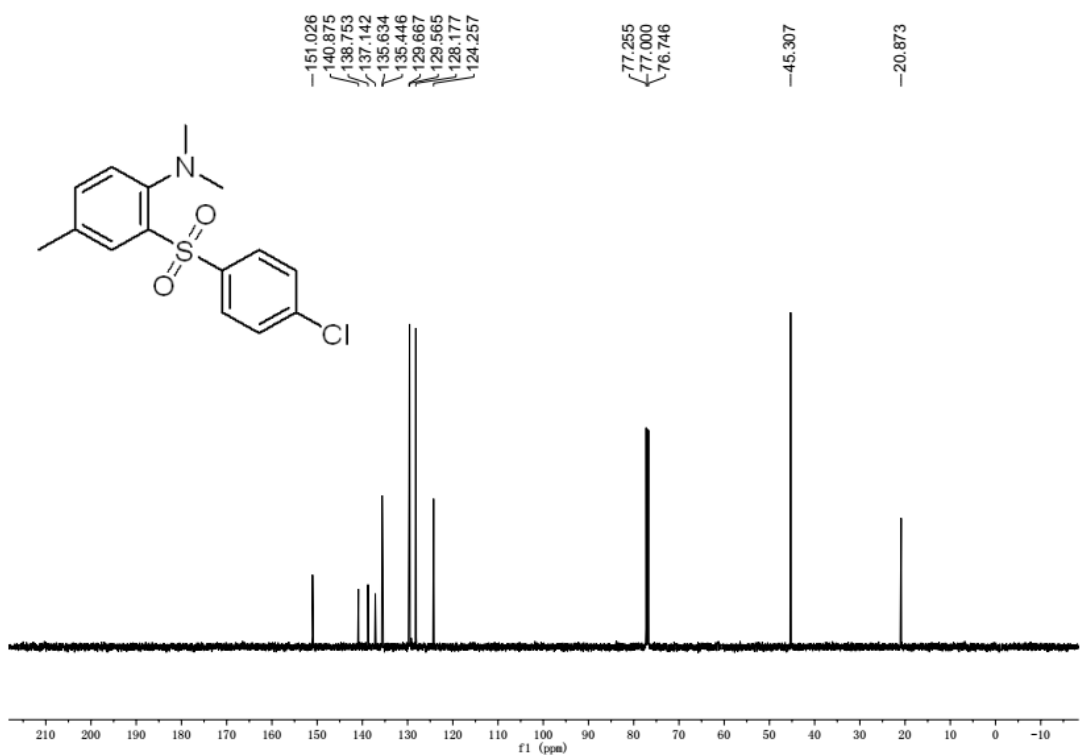

4-(Tert-butyl)-2-((4-chlorophenyl)sulfonyl)-*N,N*-dimethylaniline (3ca):

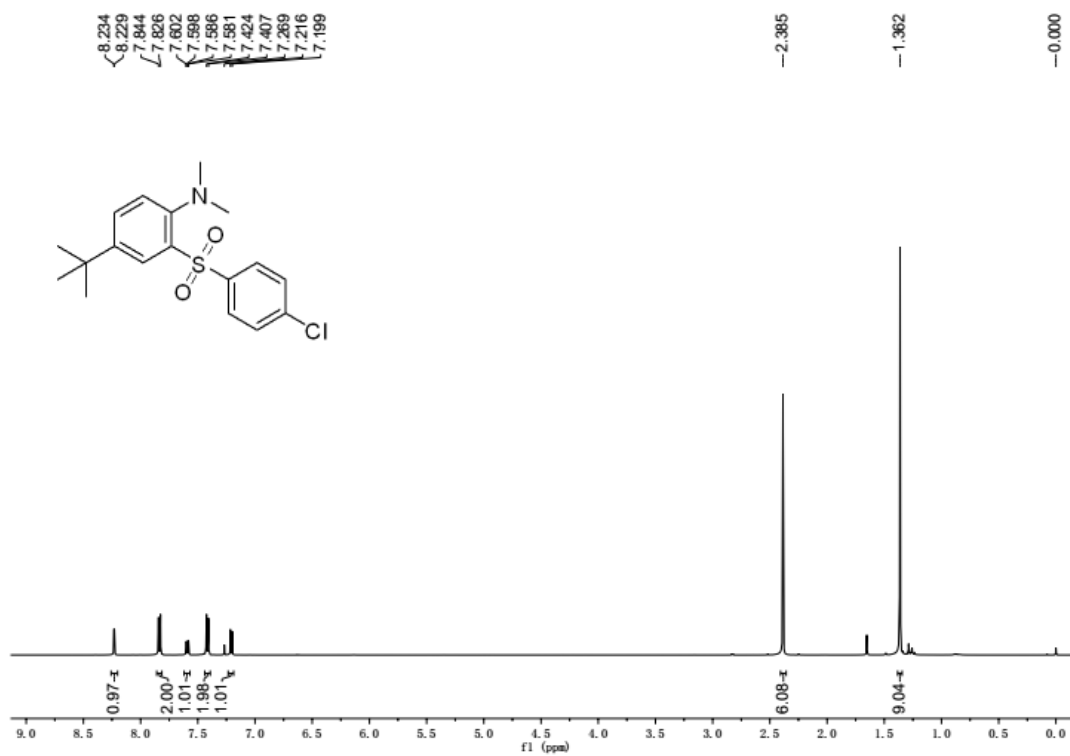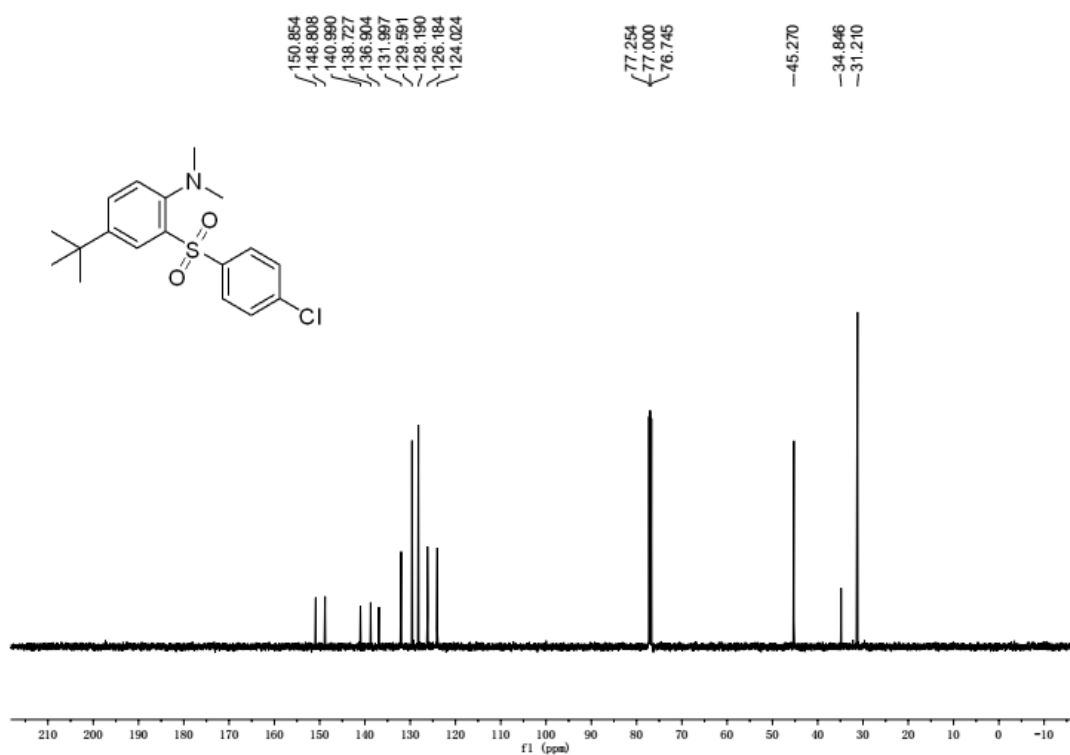

**4-Bromo-2-((4-chlorophenyl)sulfonyl)-*N,N*-dimethylaniline(3da):**

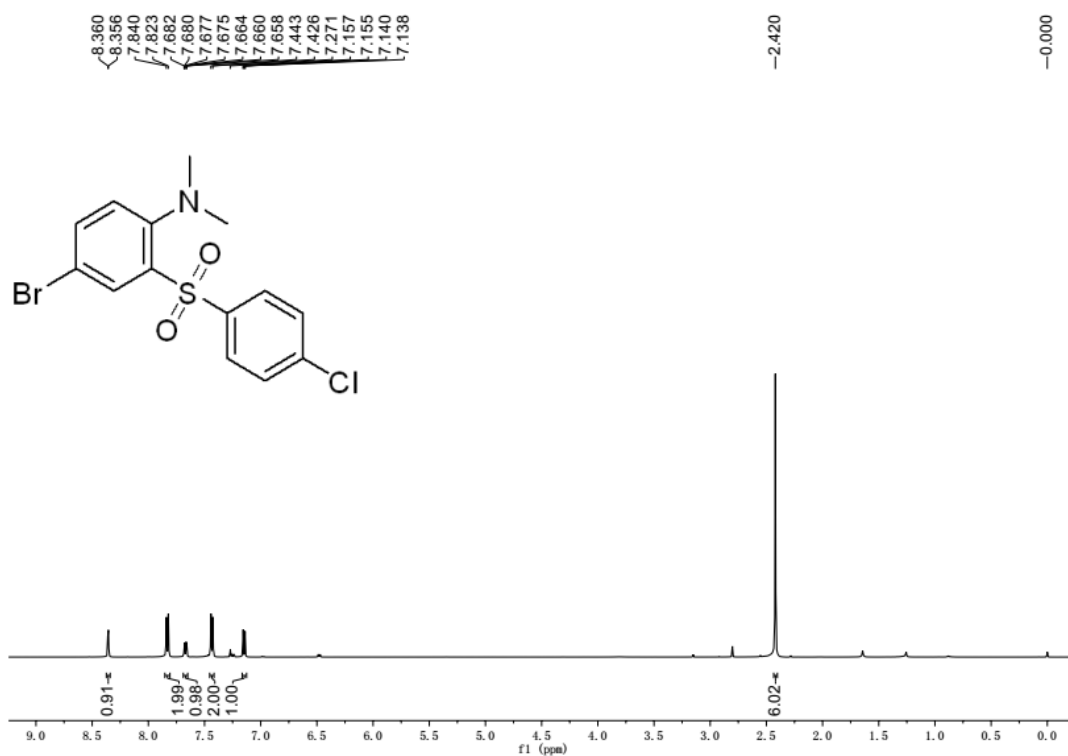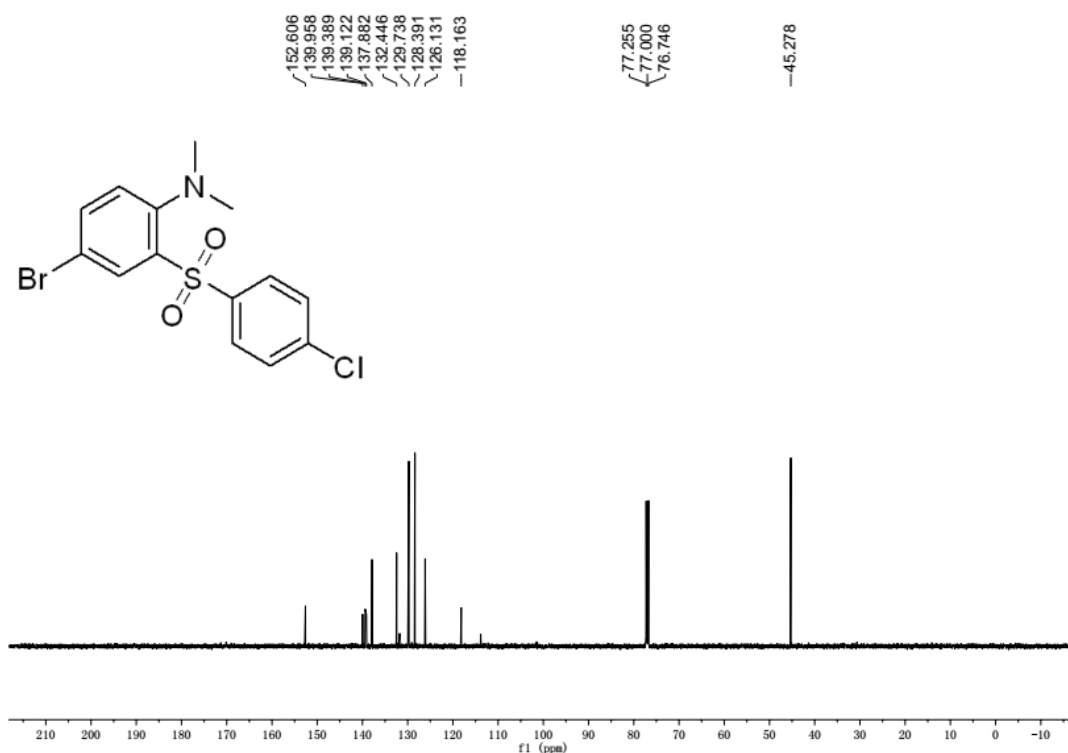

2-((4-Chlorophenyl)sulfonyl)-*N,N*-dimethyl-4-(trifluoromethyl)aniline: (3ea) :

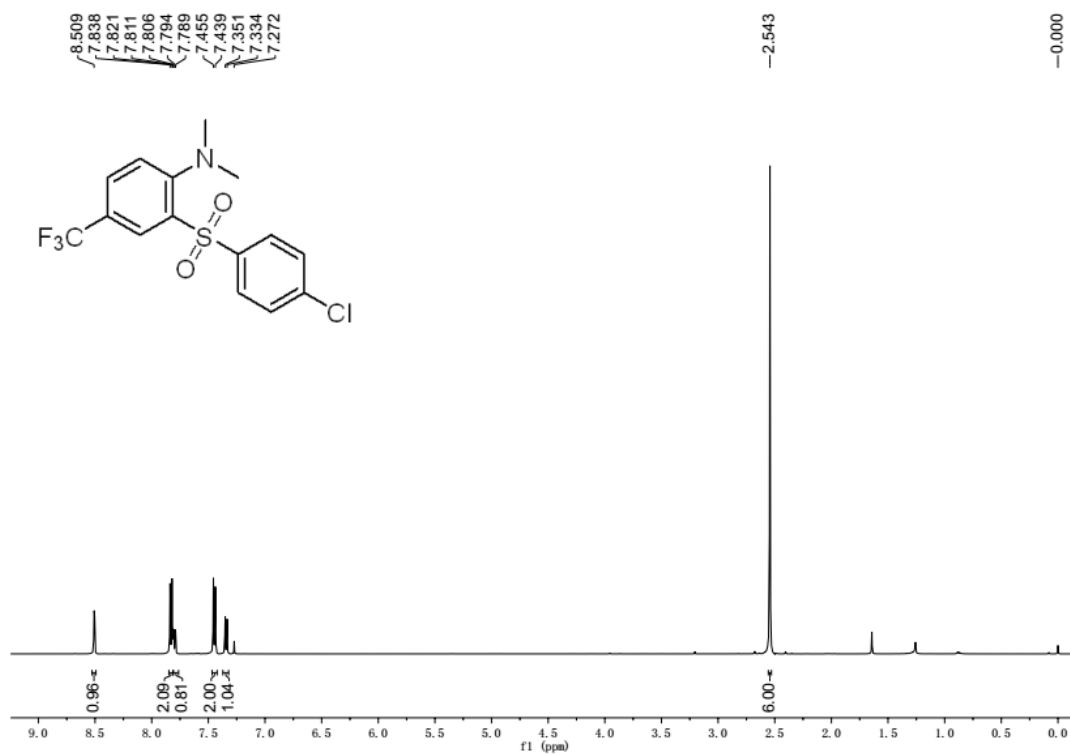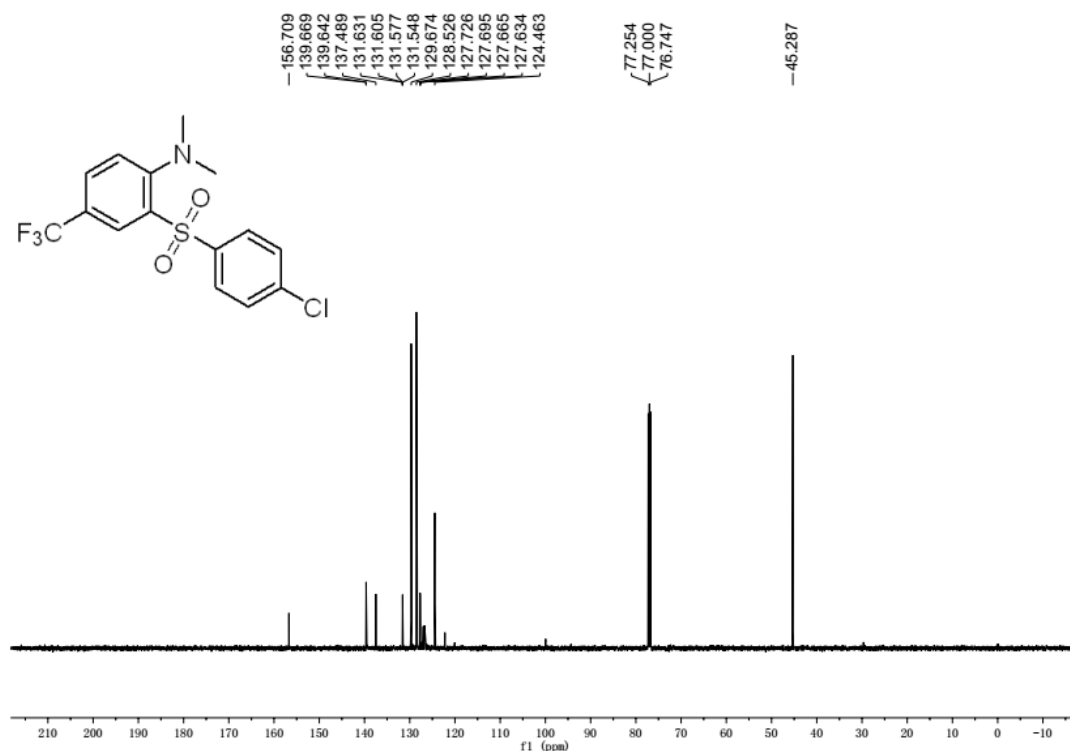

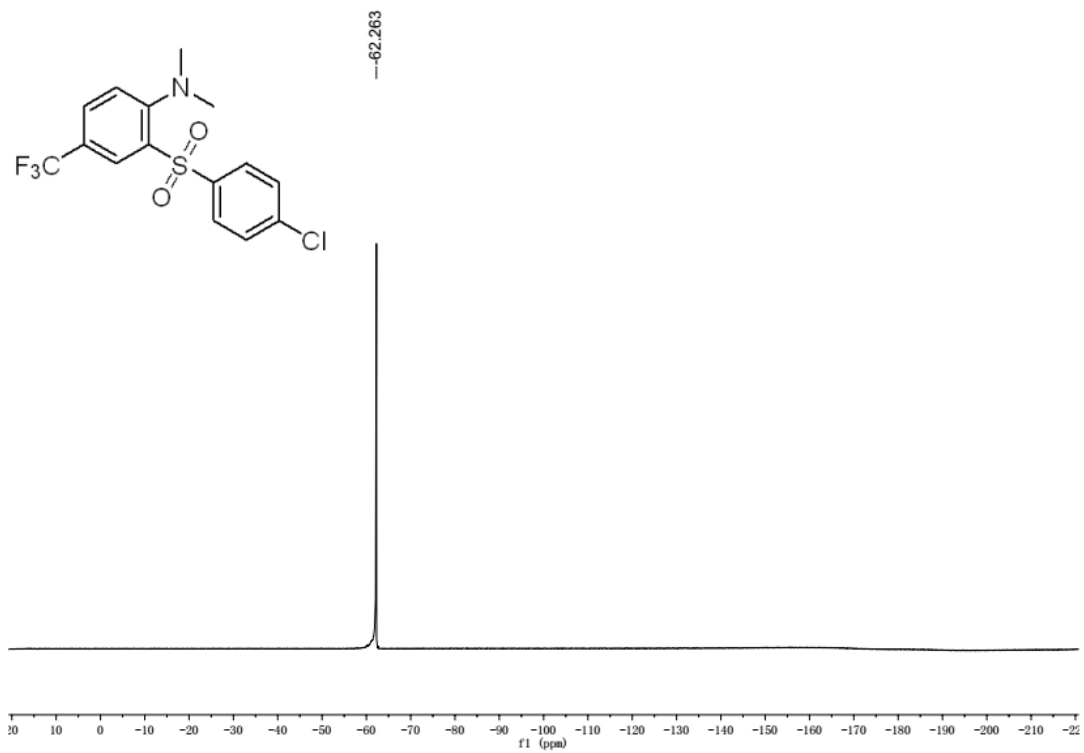

2-((4-Chlorophenyl)sulfonyl)-*N,N*,4,5-tetramethylaniline and 2-((4-

Chlorophenyl)sulfonyl)-*N,N*,3,4-tetramethylaniline (3fa):

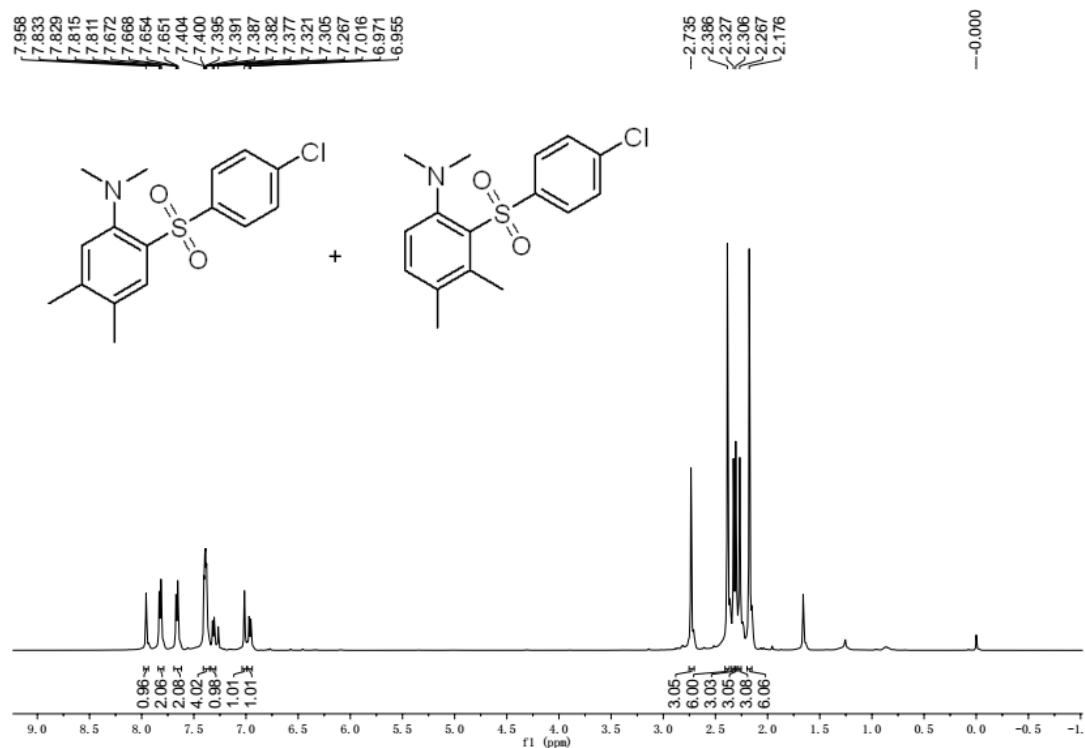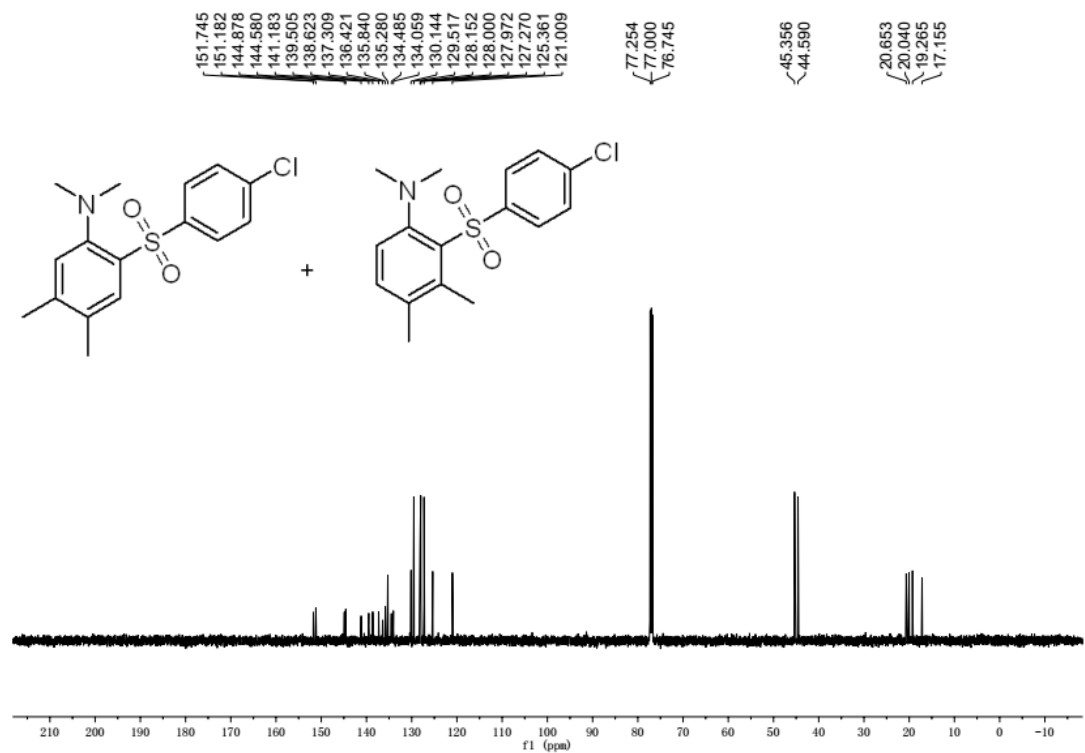



4-((4-Chlorophenyl)sulfonyl)-2,6-dimethoxy-N,N-dimethylaniline (3ga):

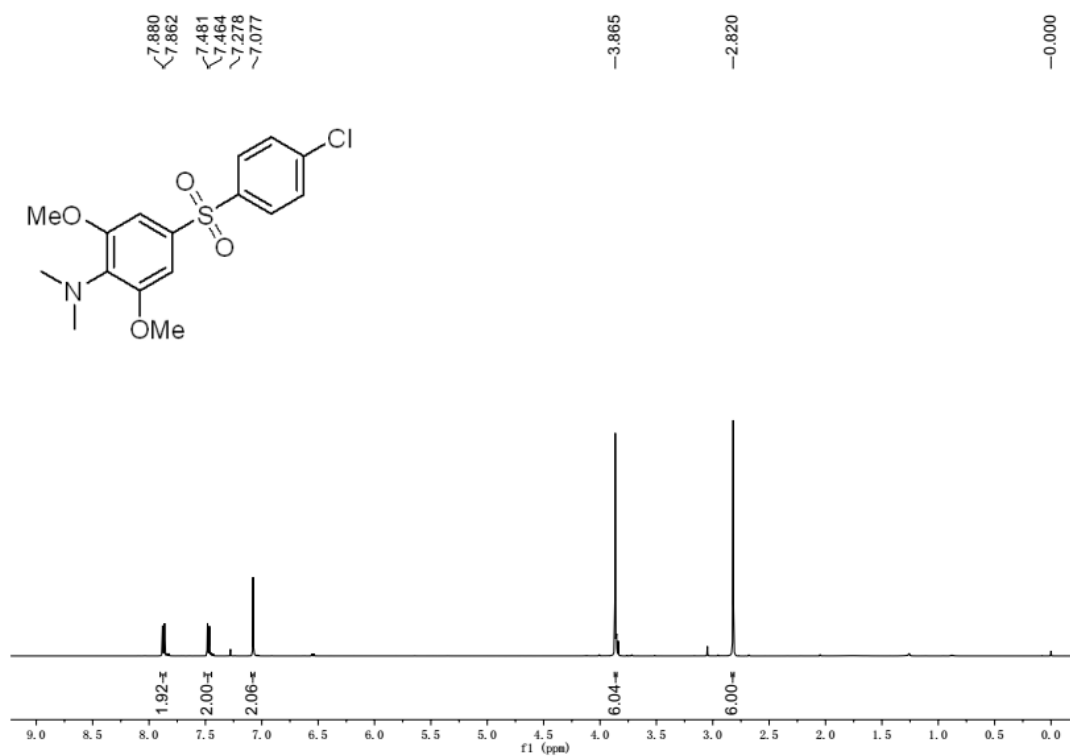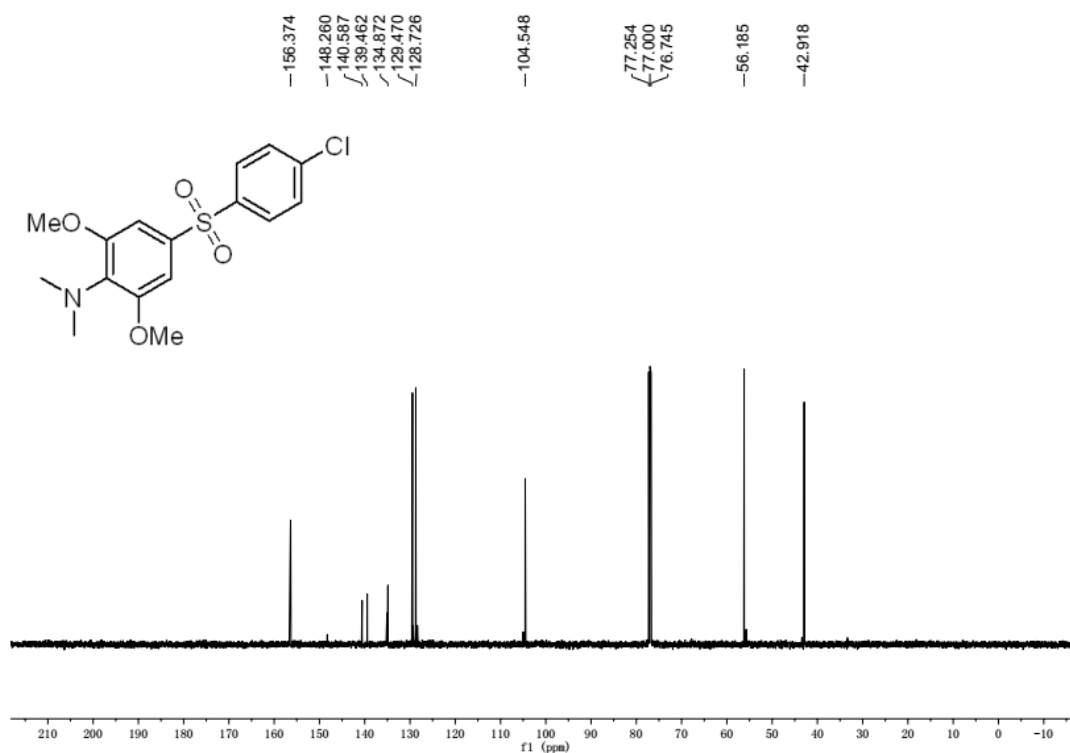

### 4-((4-Chlorophenyl)sulfonyl)-3,5-dimethoxy-N,N-dimethylaniline (3ha)

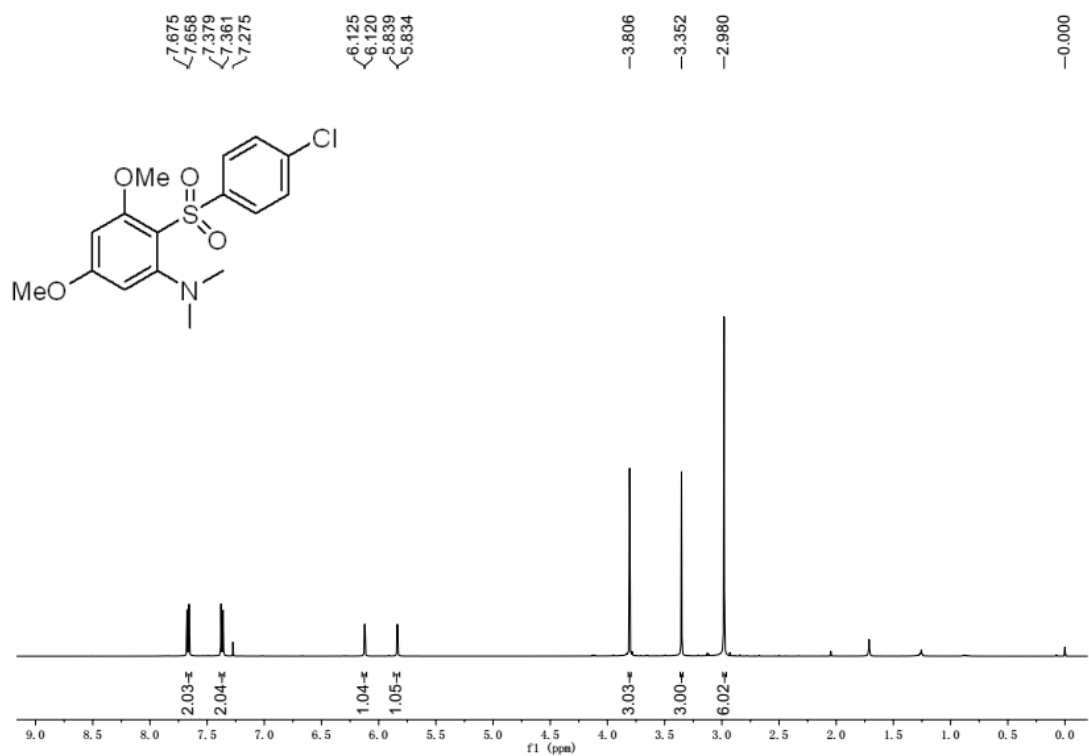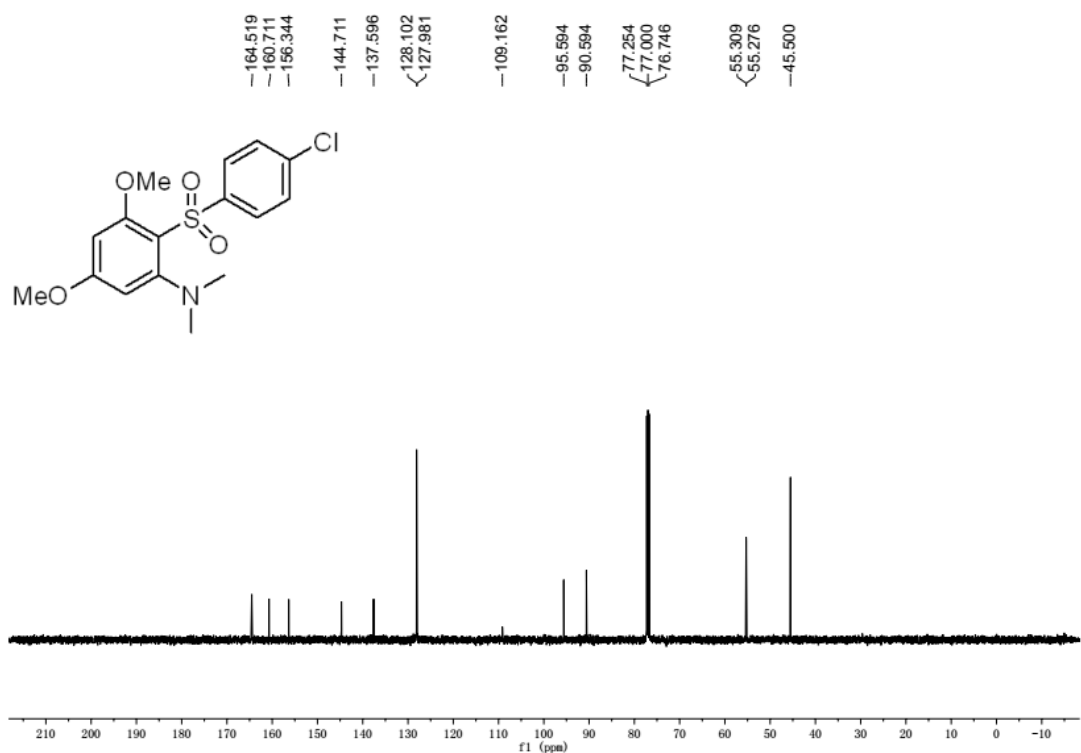

### 4-((4-Chlorophenyl)sulfonyl)-*N,N*-diphenylaniline (3ia):

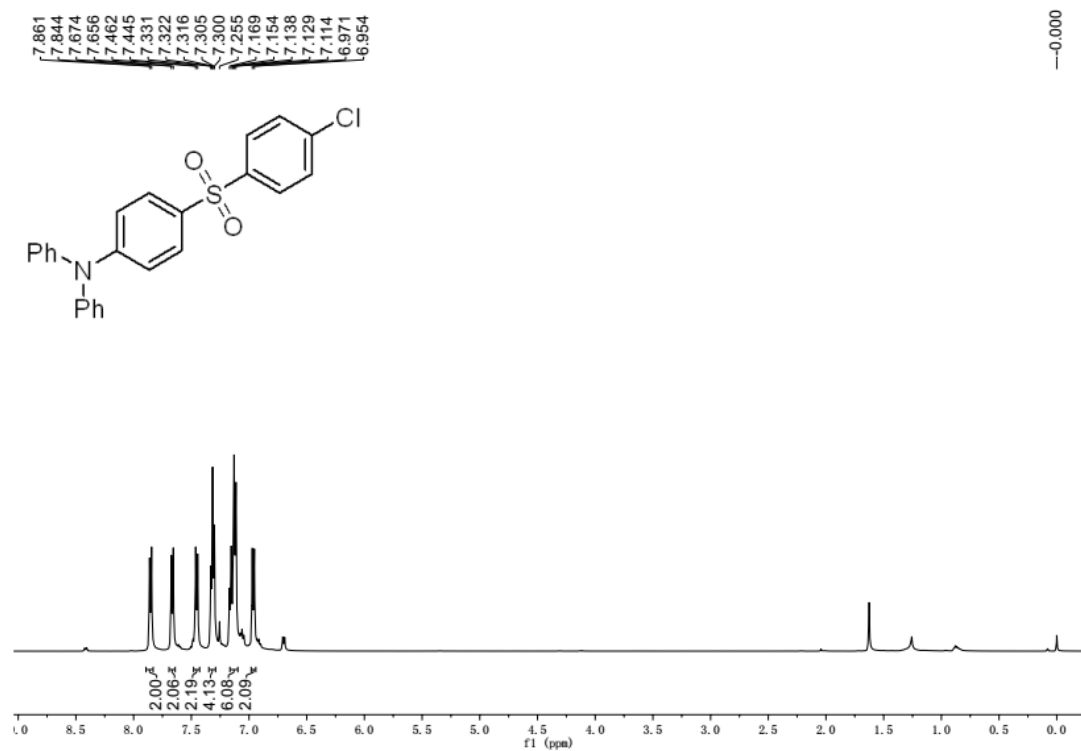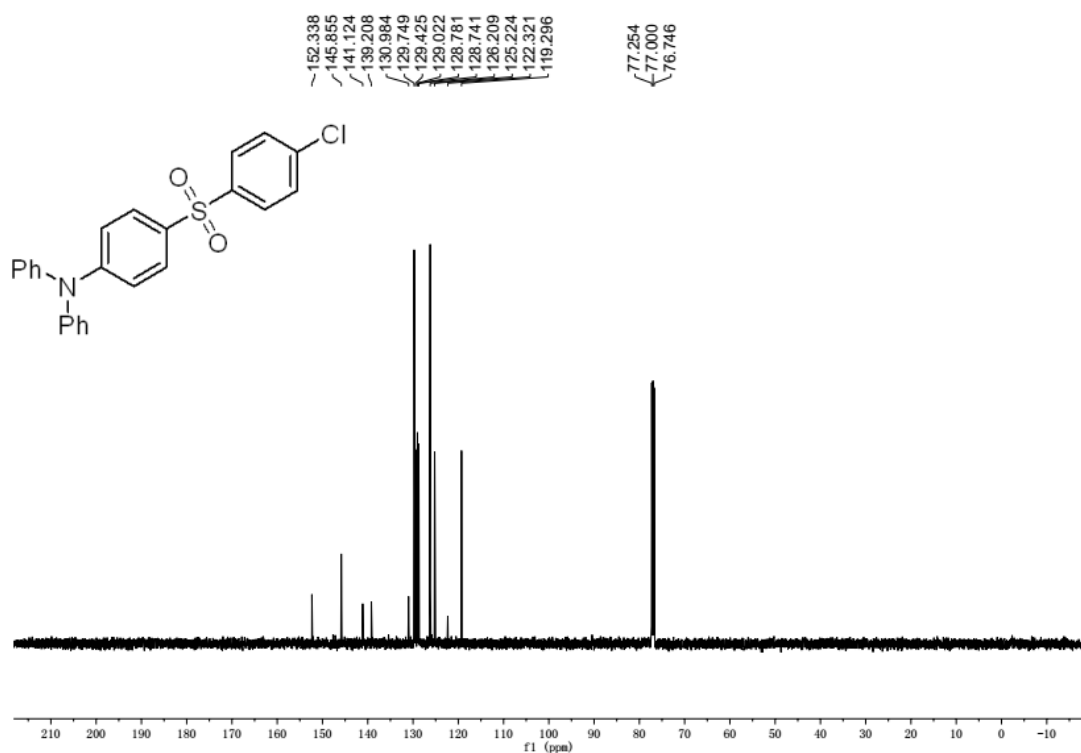

## 2-((4-chlorophenyl)sulfonyl)-*N,N*-dimethylaniline (3ja)

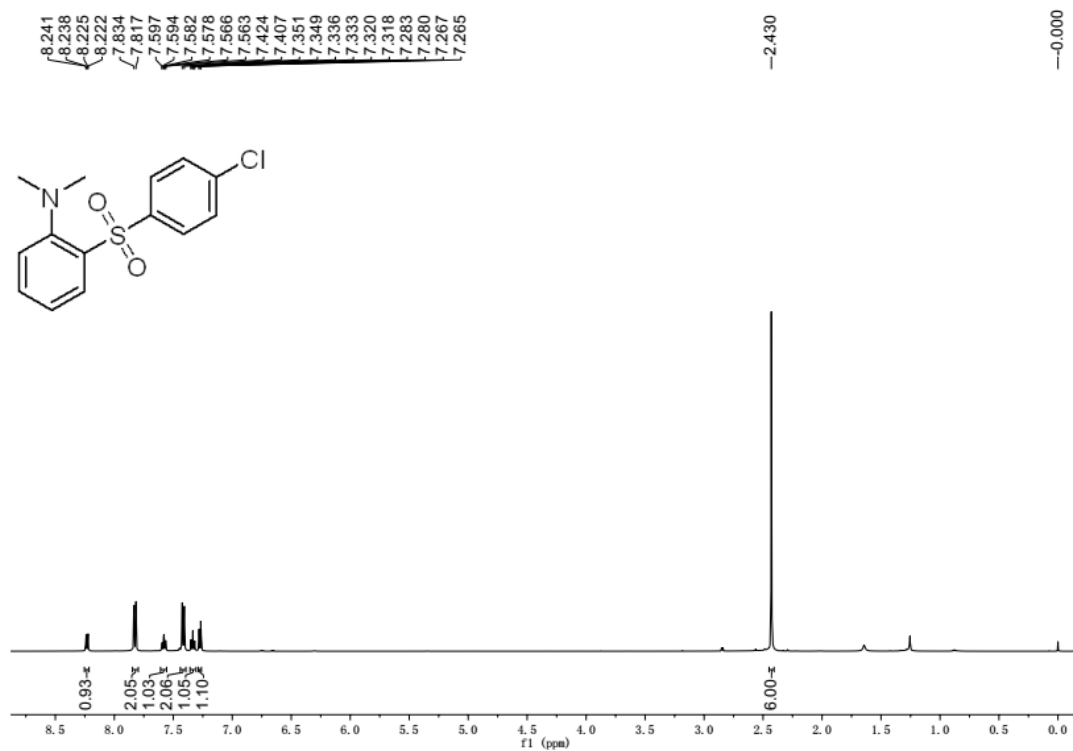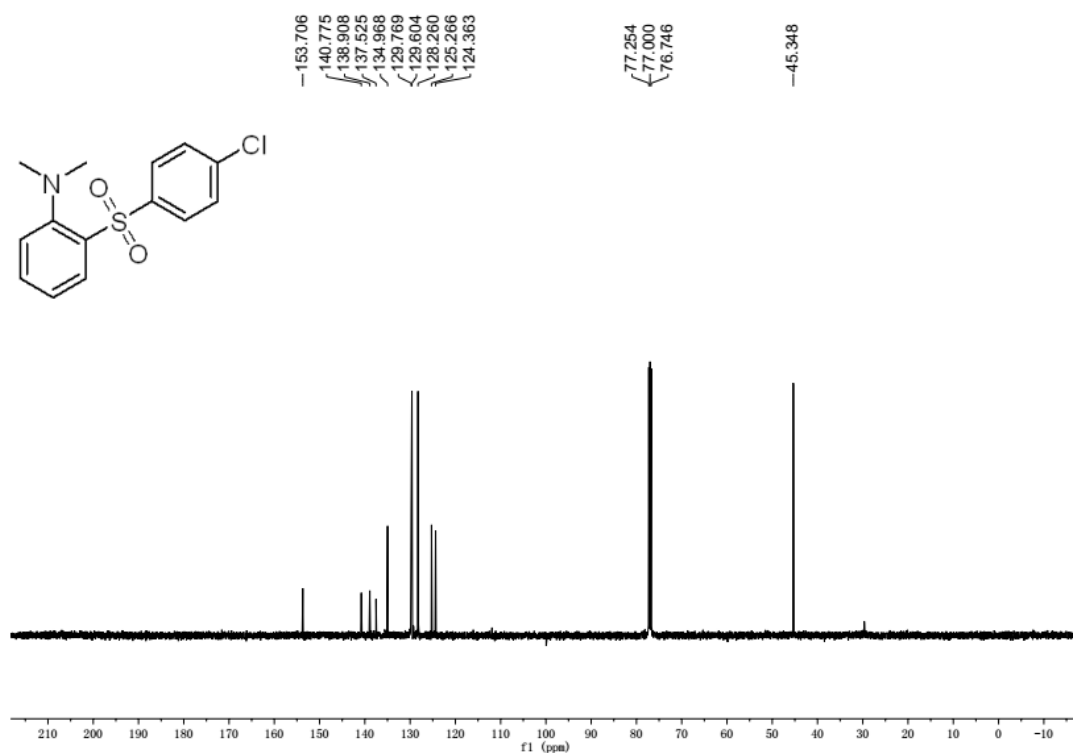

1-(4-((4-Chlorophenyl)sulfonyl)phenyl)pyrrolidine (3ka):

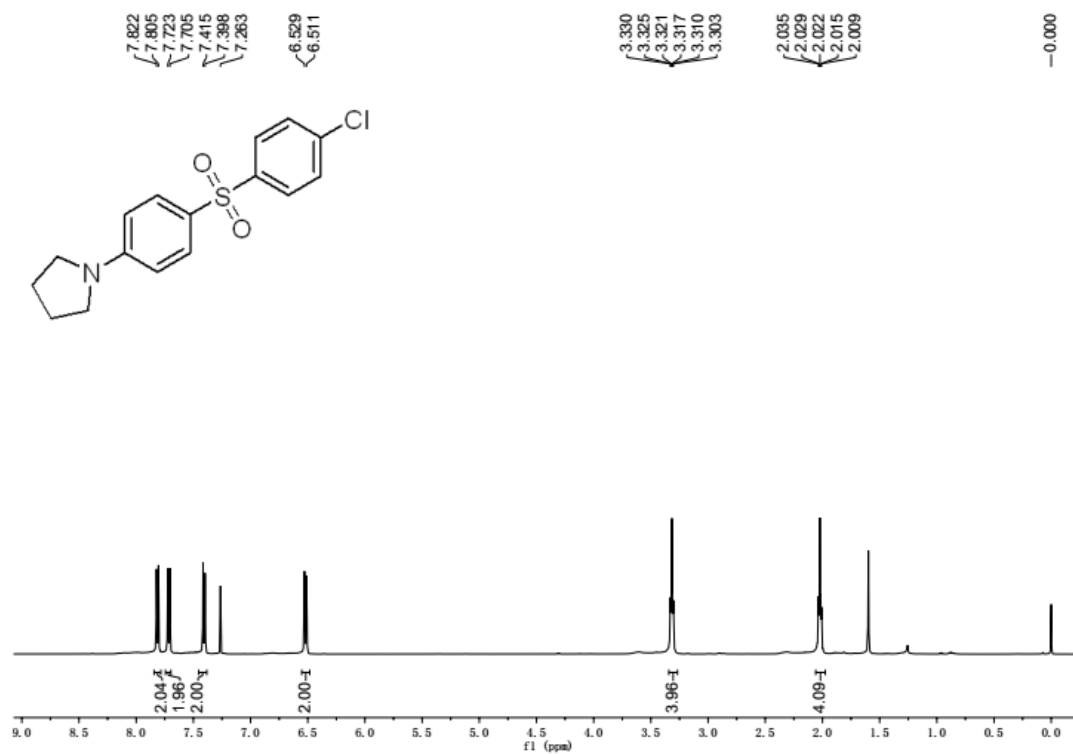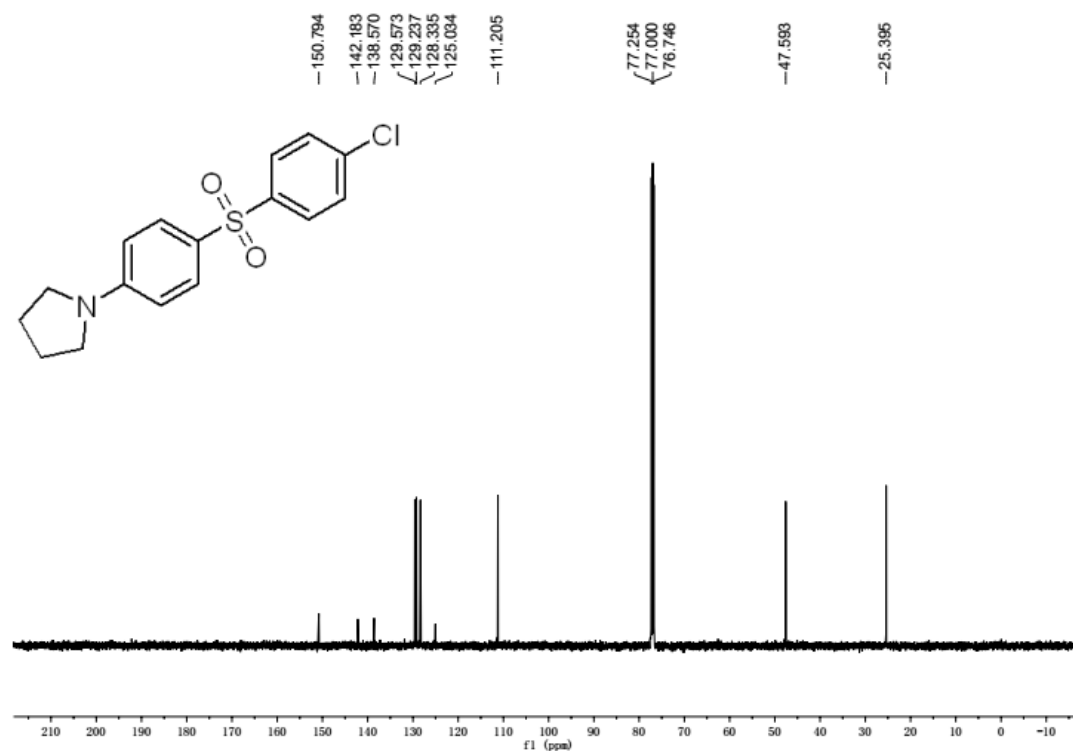

4-(2-((4-Chlorophenyl)sulfonyl)phenyl)morpholine (3la):

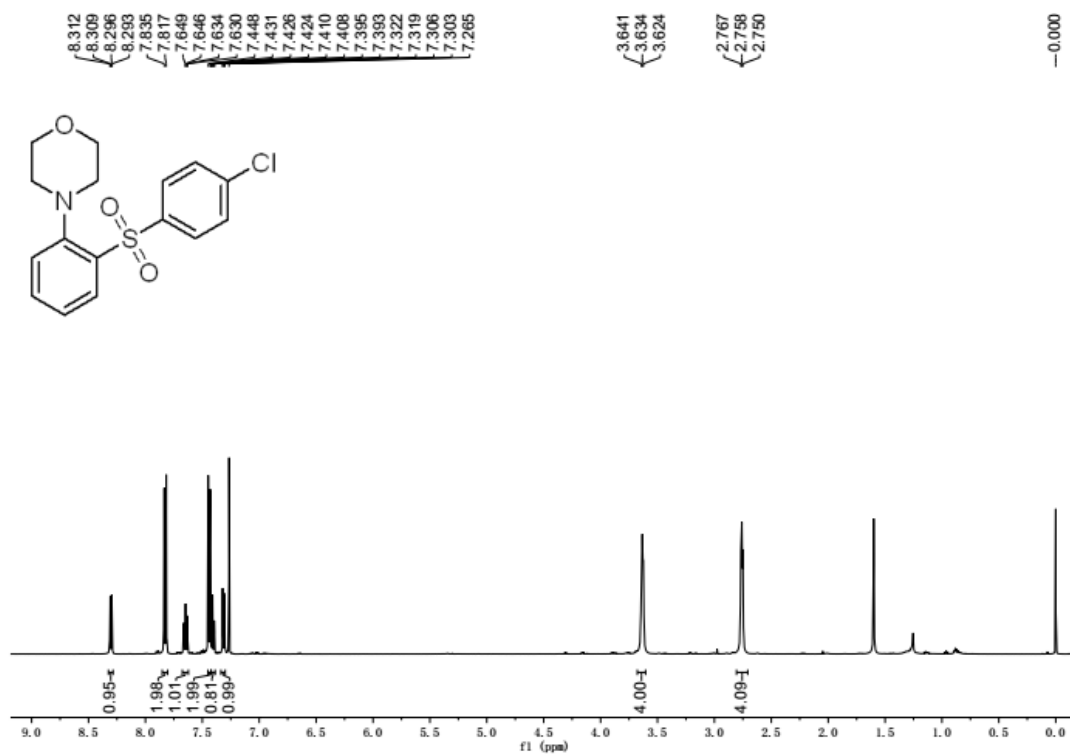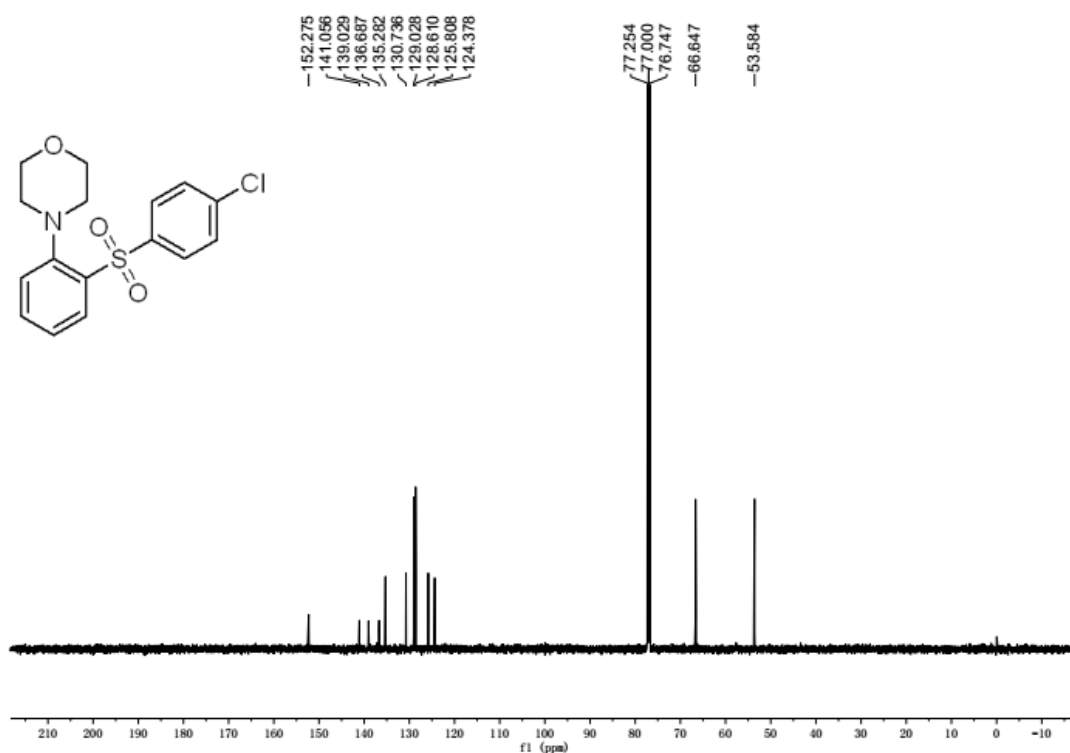

4-(4-((4-Chlorophenyl)sulfonyl)phenyl)morpholine (3la):

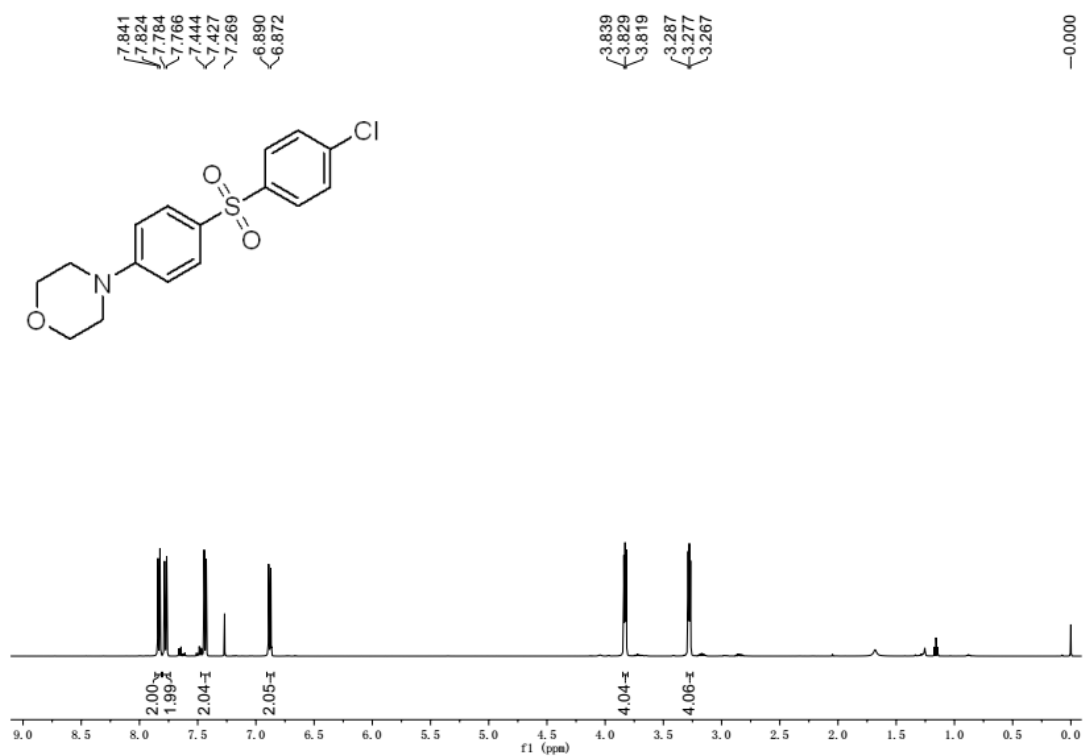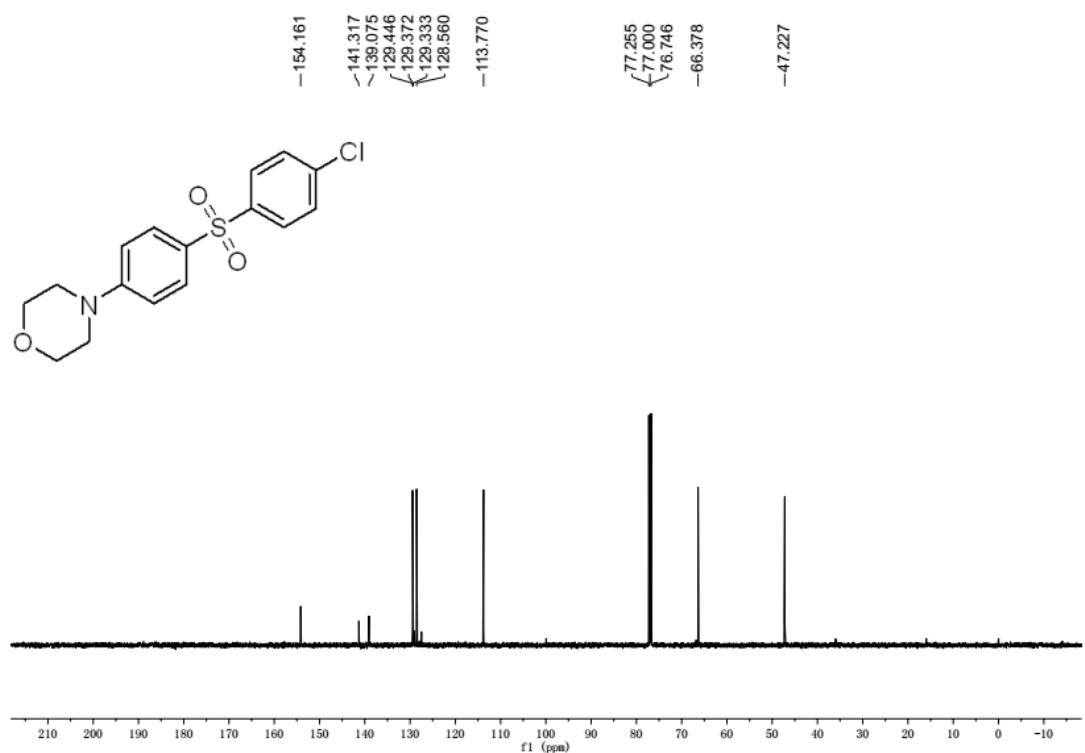

2-((4-Chlorophenyl)sulfonyl)-*N*-ethyl-*N*-methylaniline (3ma):

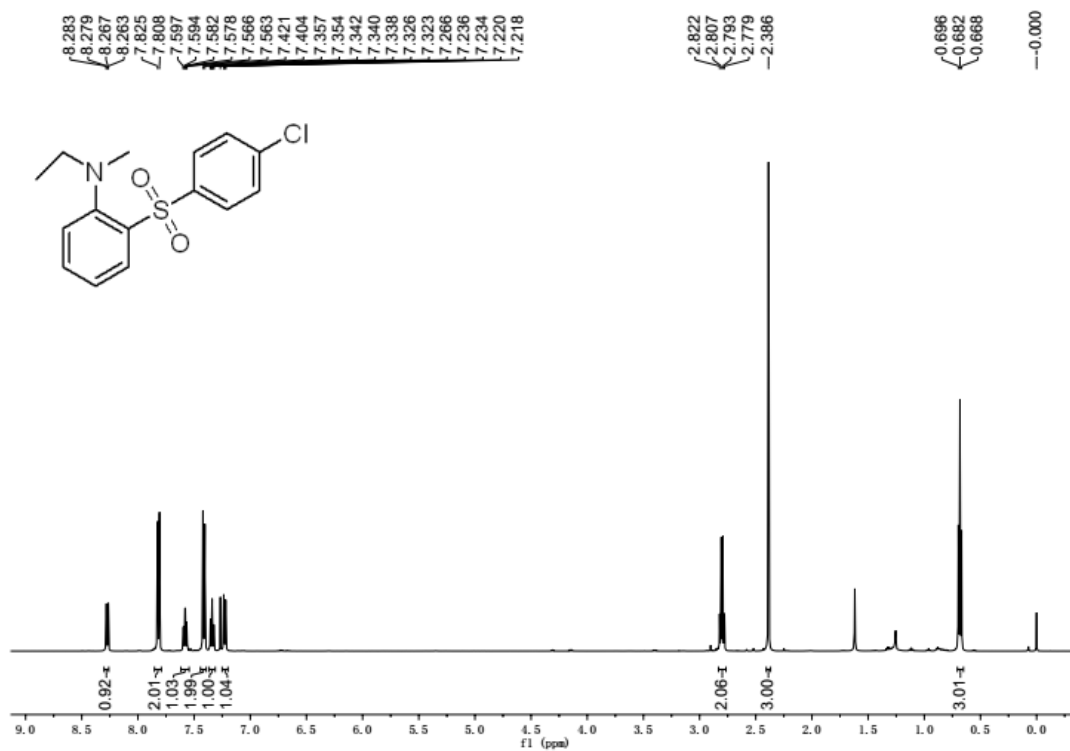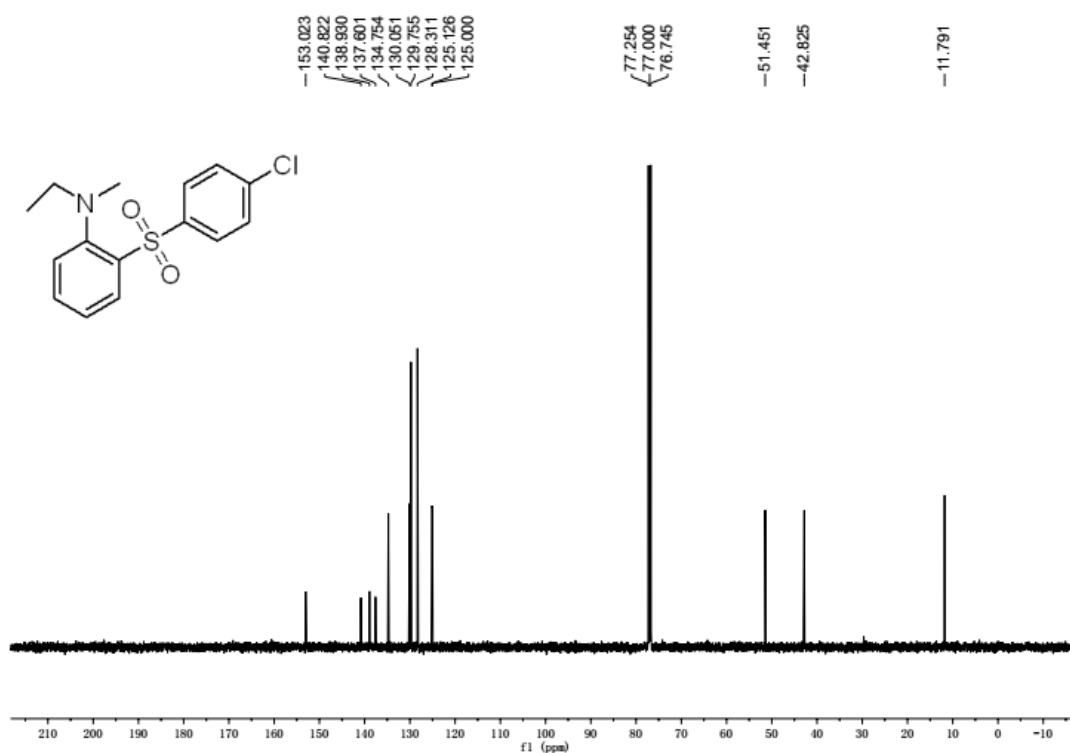



4-((4-Chlorophenyl)sulfonyl)-N-ethyl-N-methylaniline (3ma):

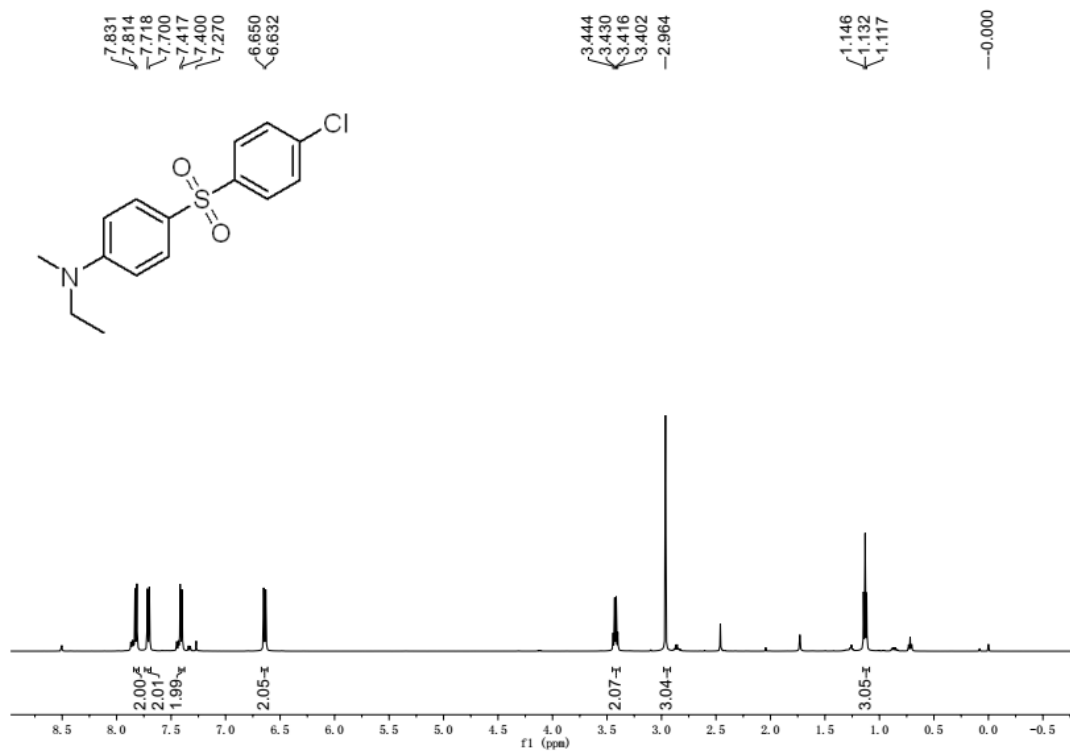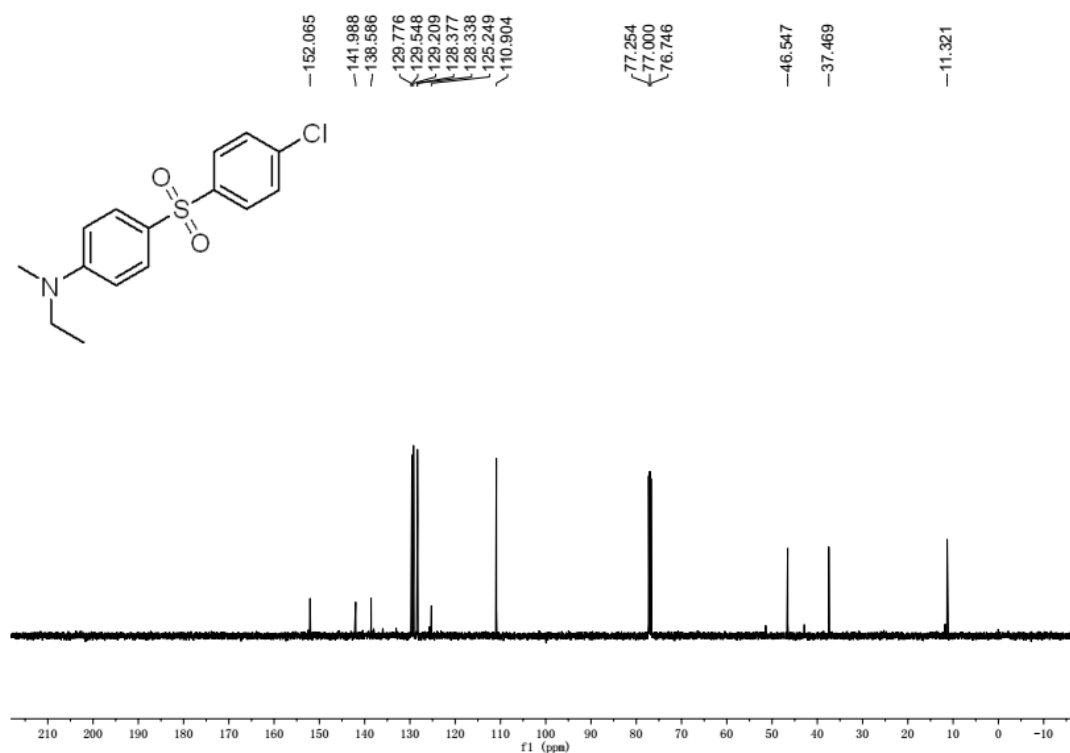

4-((4-Chlorophenyl)sulfonyl)-*N,N*-dimethylnaphthalen-1-amine (3na):

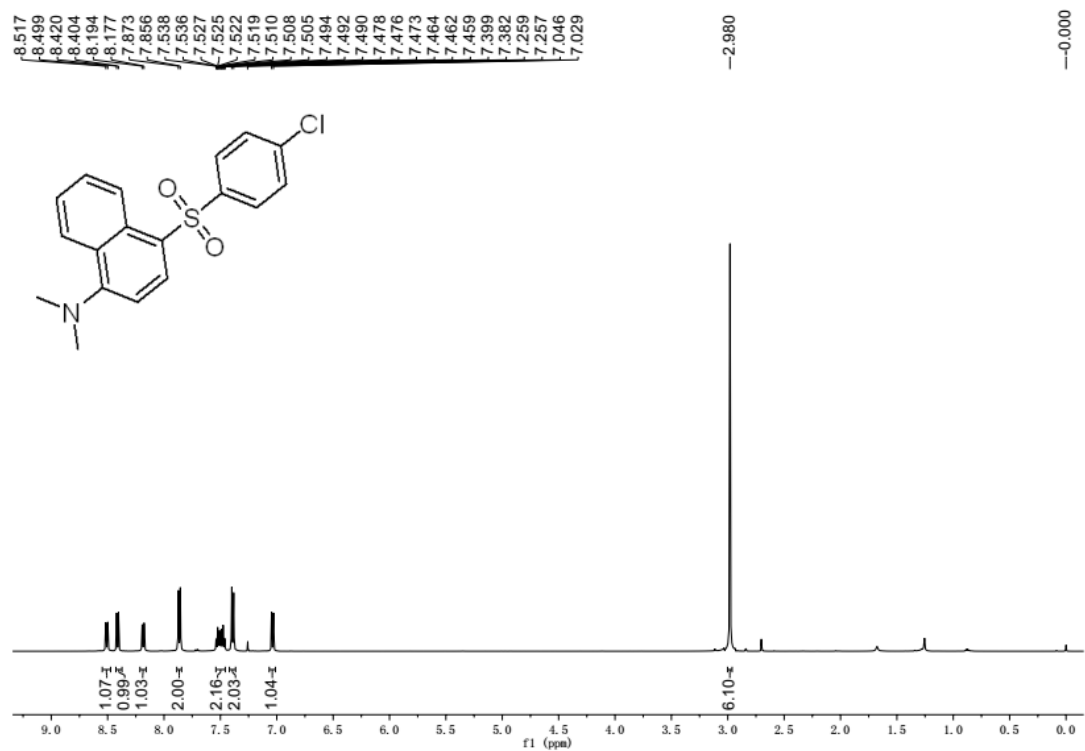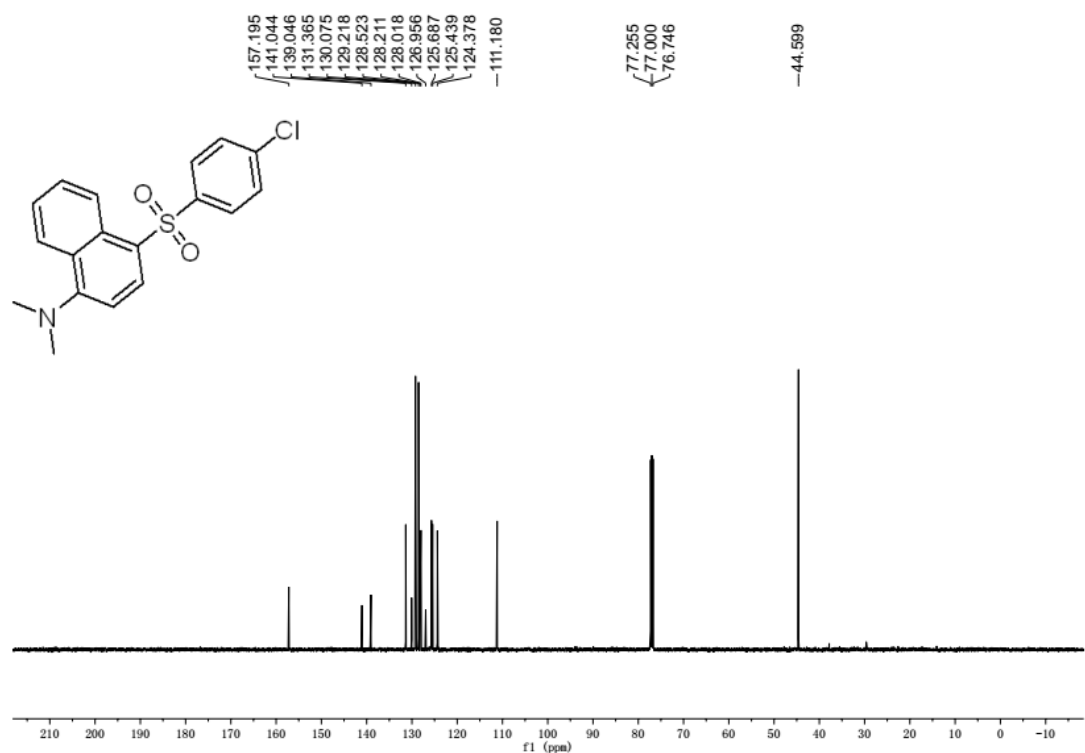

5-((4-Chlorophenyl)sulfonyl)-*N,N*-dimethylnaphthalen-1-amine (3na):

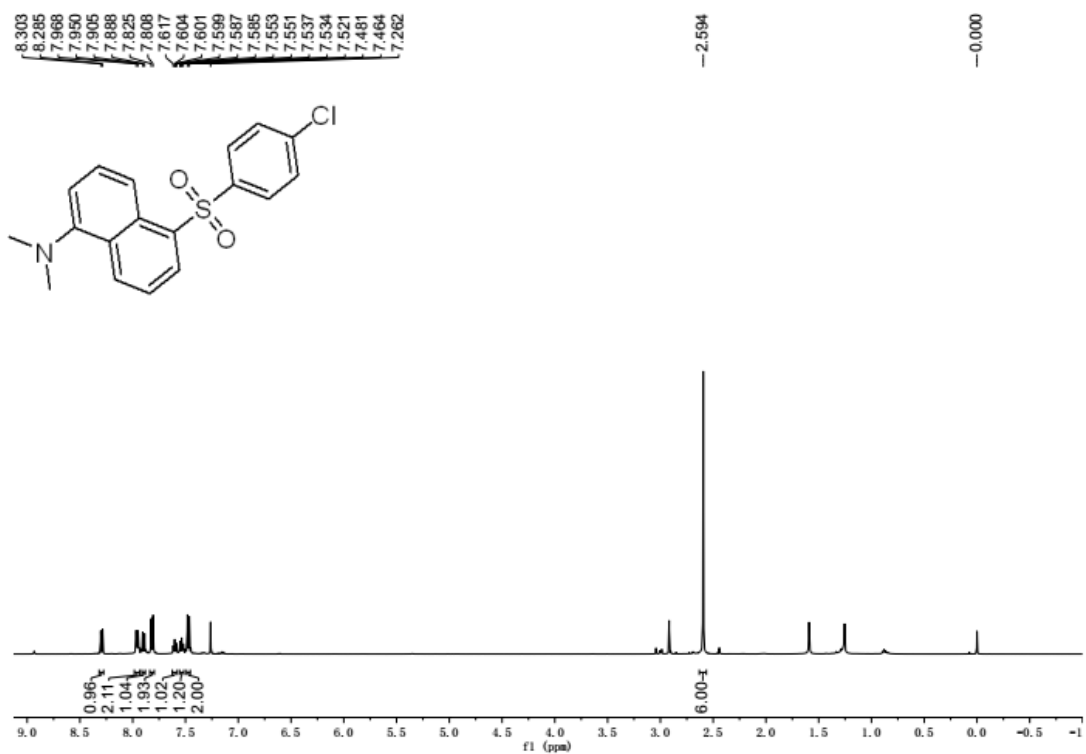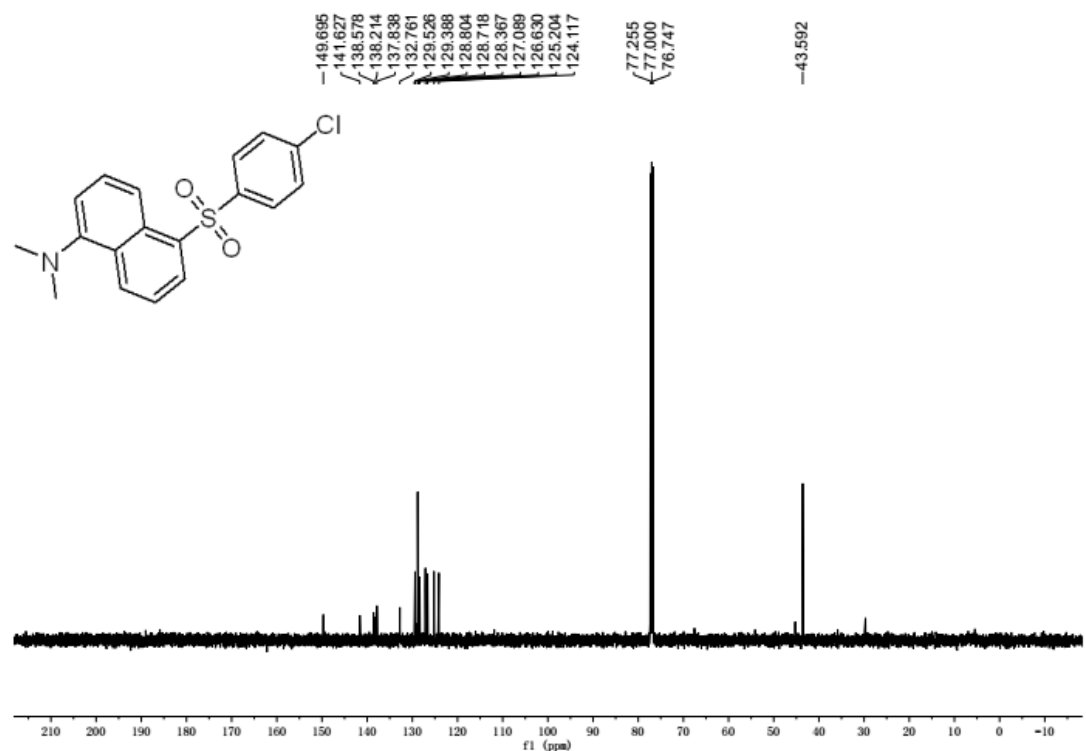

**3-((4-Chlorophenyl)sulfonyl)-10-ethyl-10H-phenothiazine (30a):**

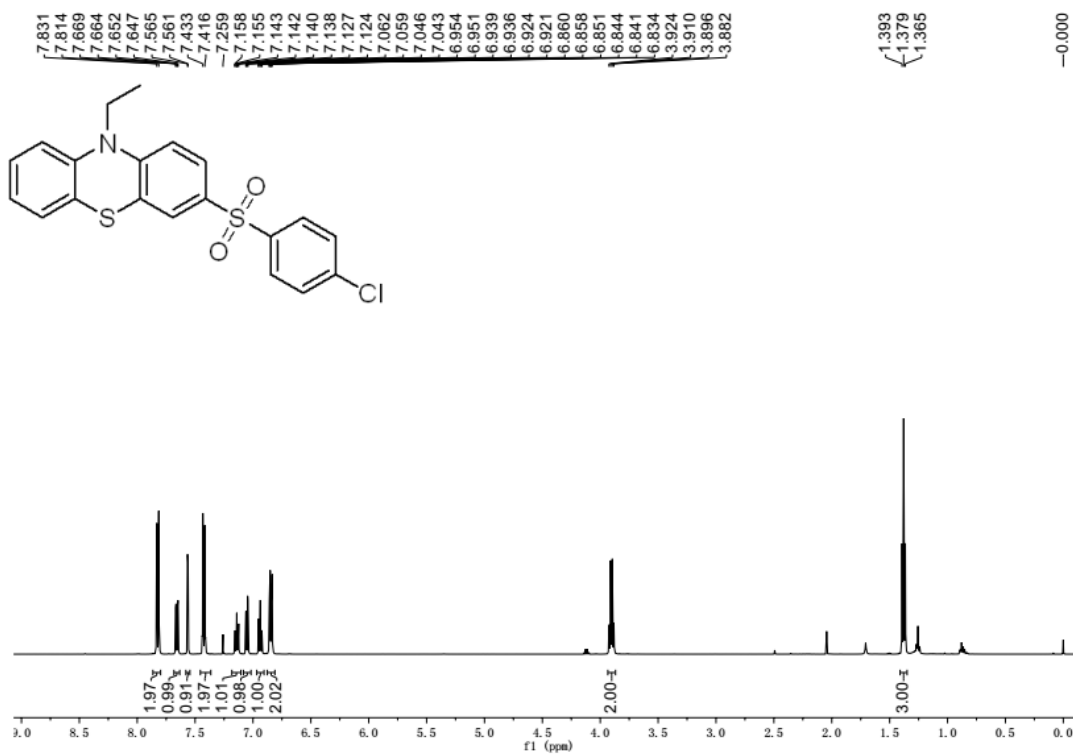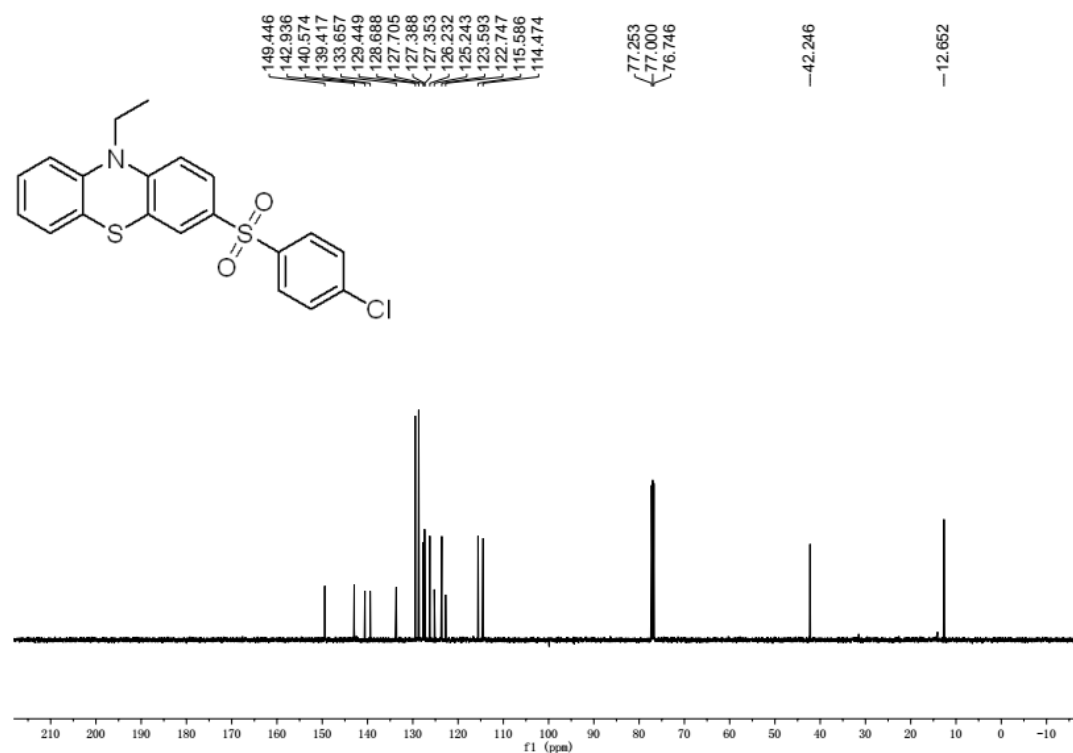

2-((4-Chlorophenyl)sulfonyl)-10,11-dihydro-5H-dibenzo[b,f]azepine(3pa):

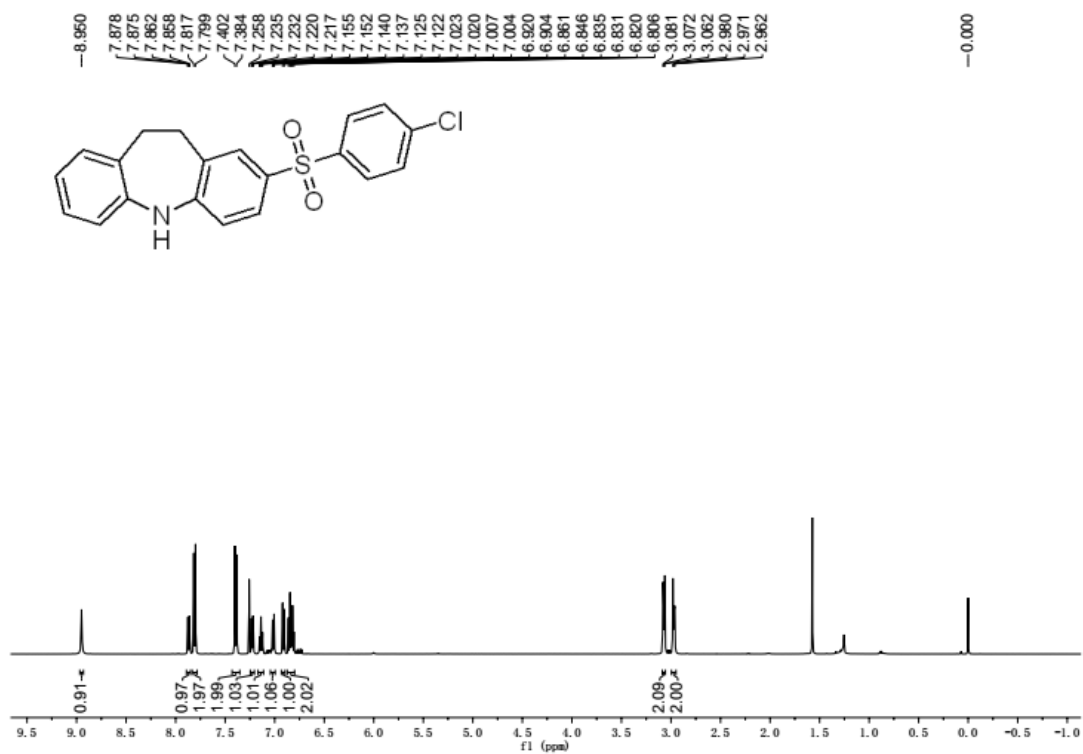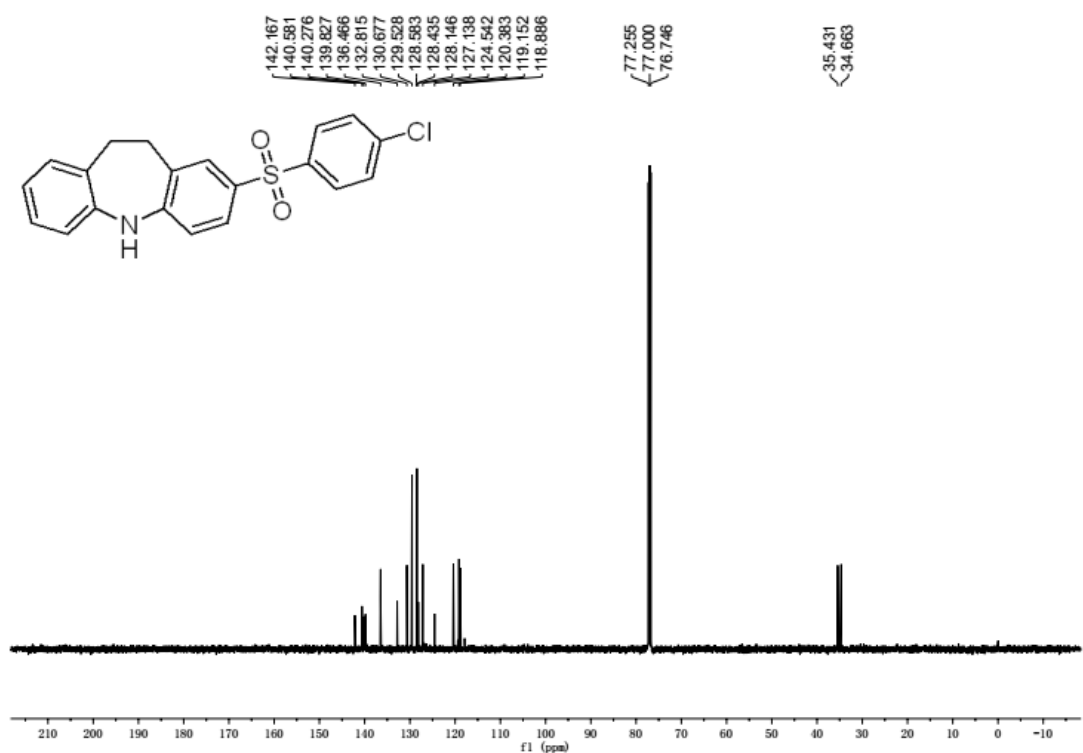

4-((4-Chlorophenyl)sulfonyl)-10,11-dihydro-5H-dibenzo[b,f]azepine(3pa):

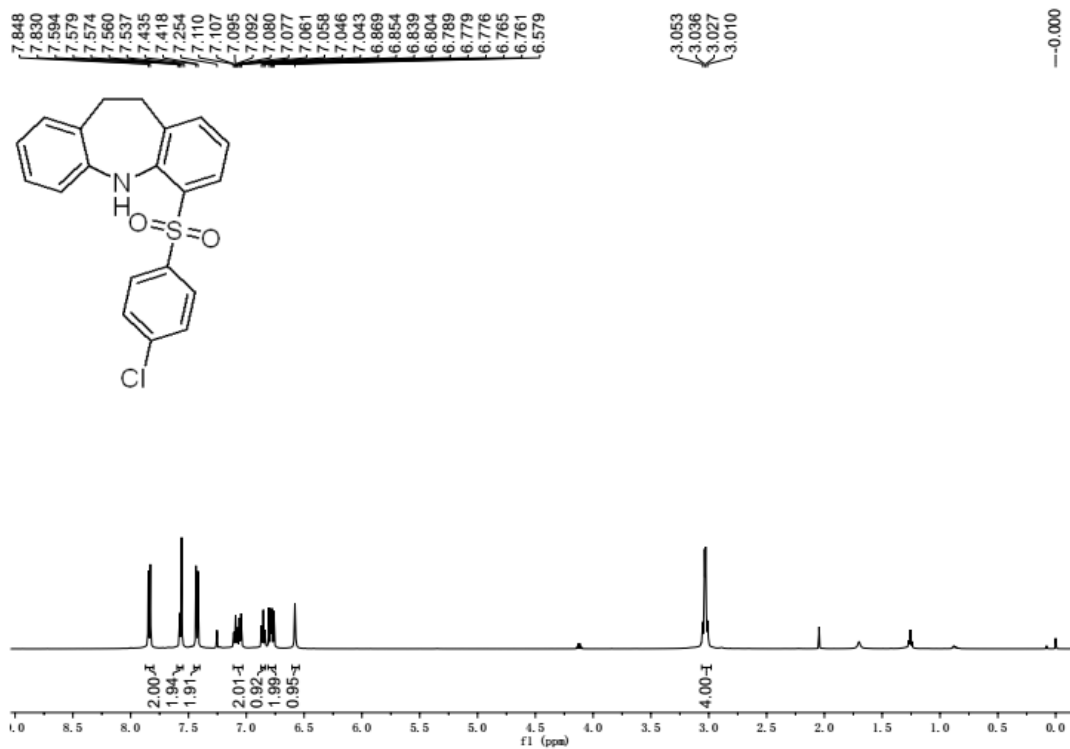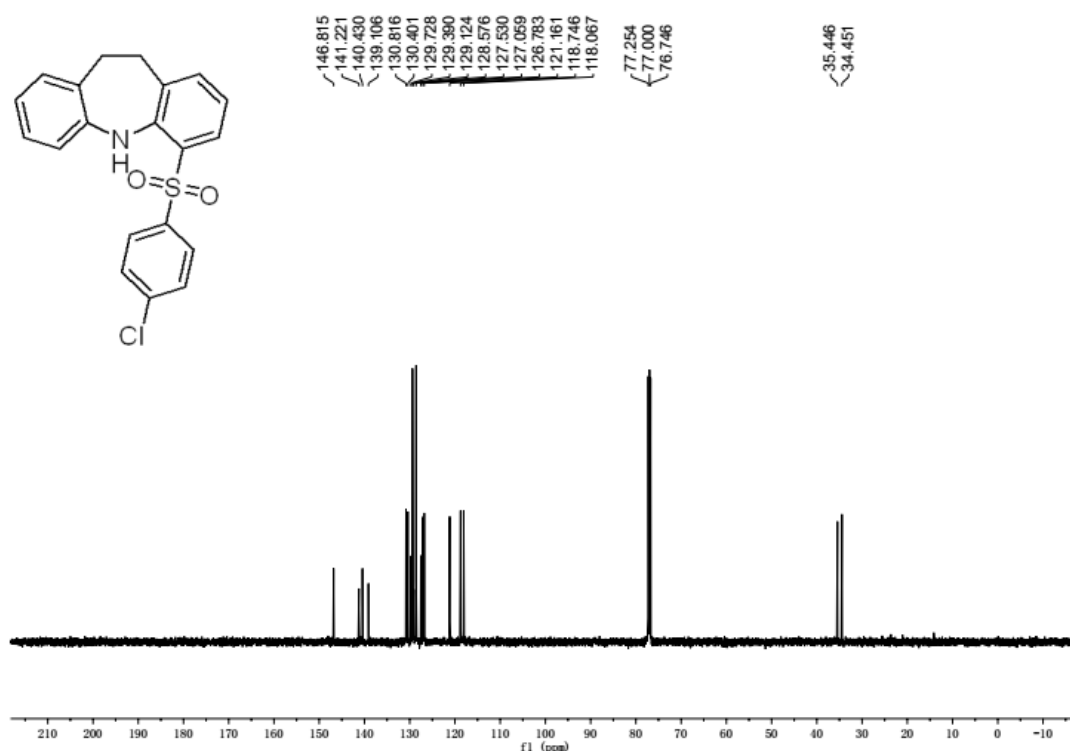

2,6-bis((4-chlorophenyl)sulfonyl)-4-methoxy-N,N-dimethylaniline(4aa):

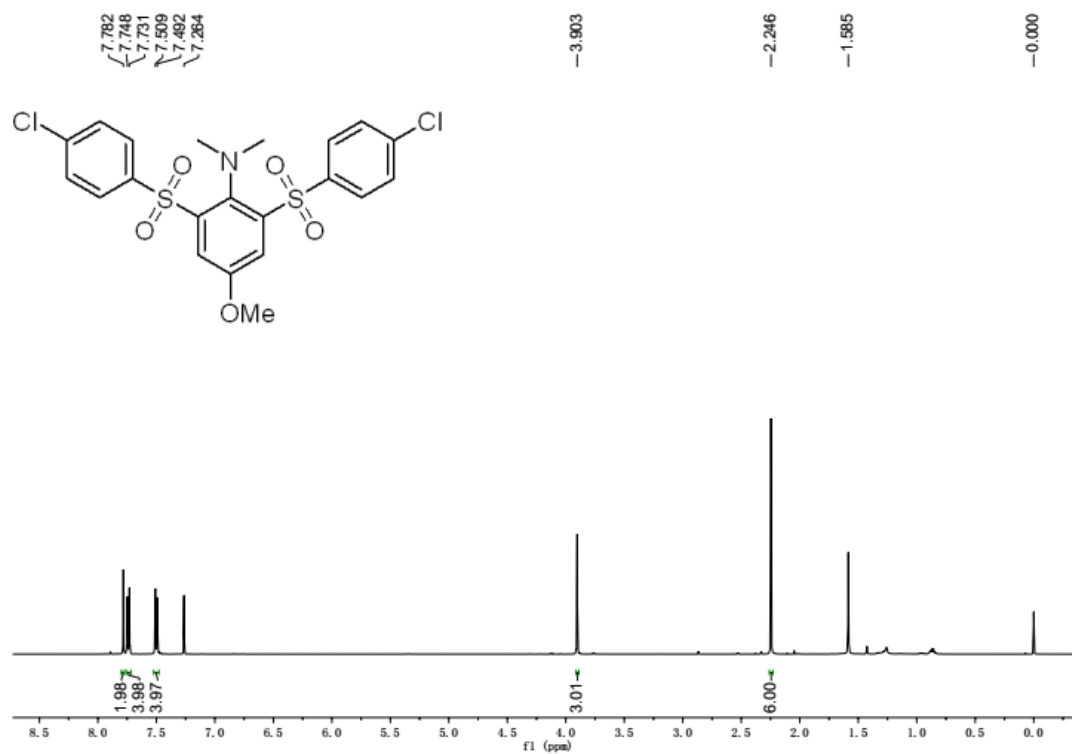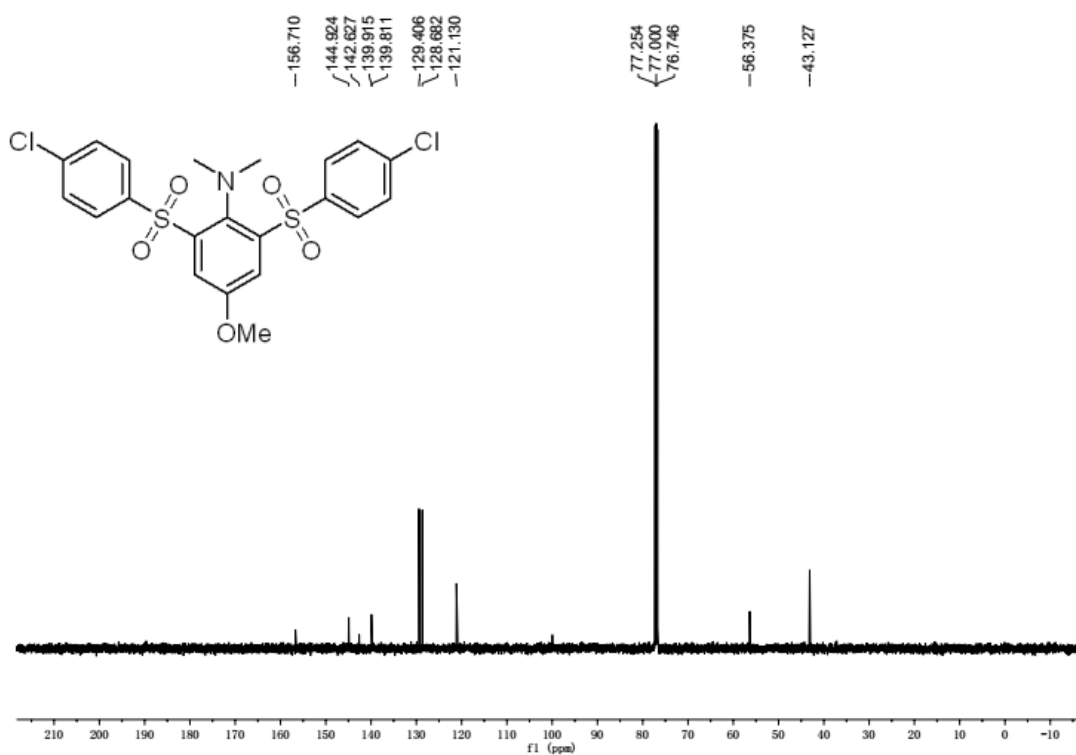

(D) The X-ray single-crystal diffraction analysis of 3aa

(CCDC 1903203)

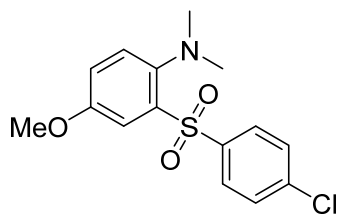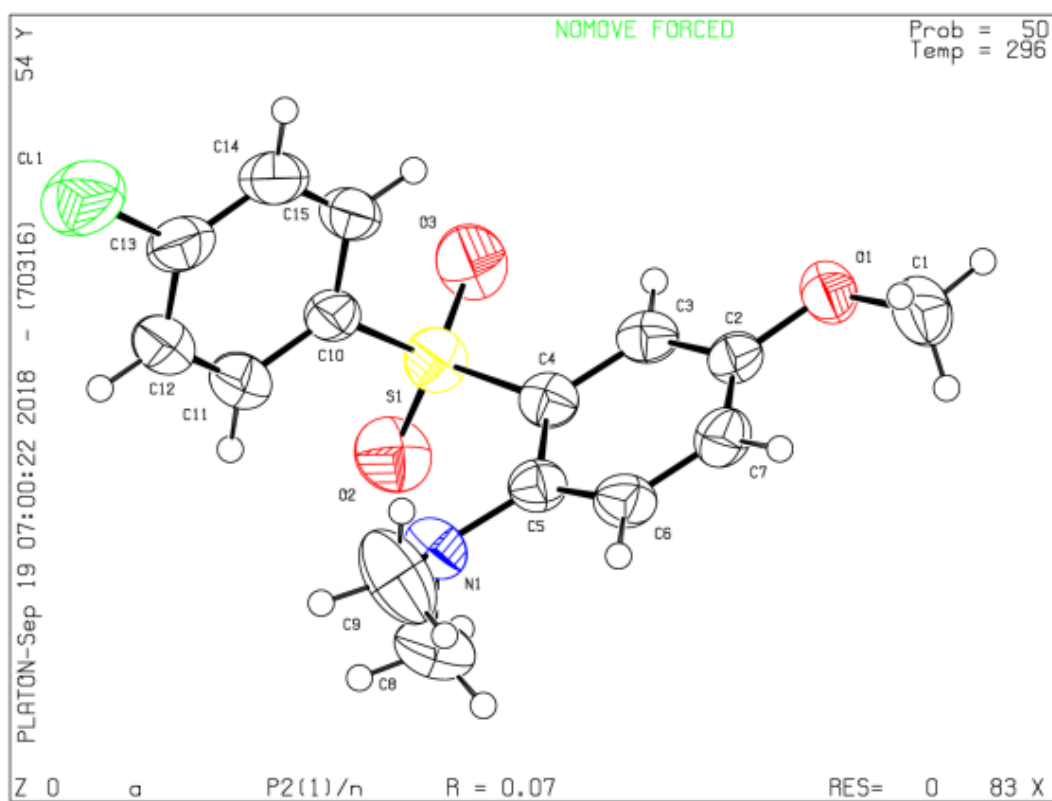



# The X-ray single-crystal diffraction analysis of 3na

(CCDC 1923102)

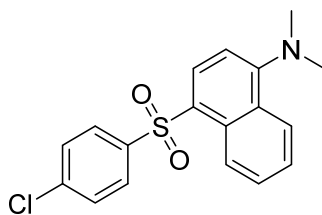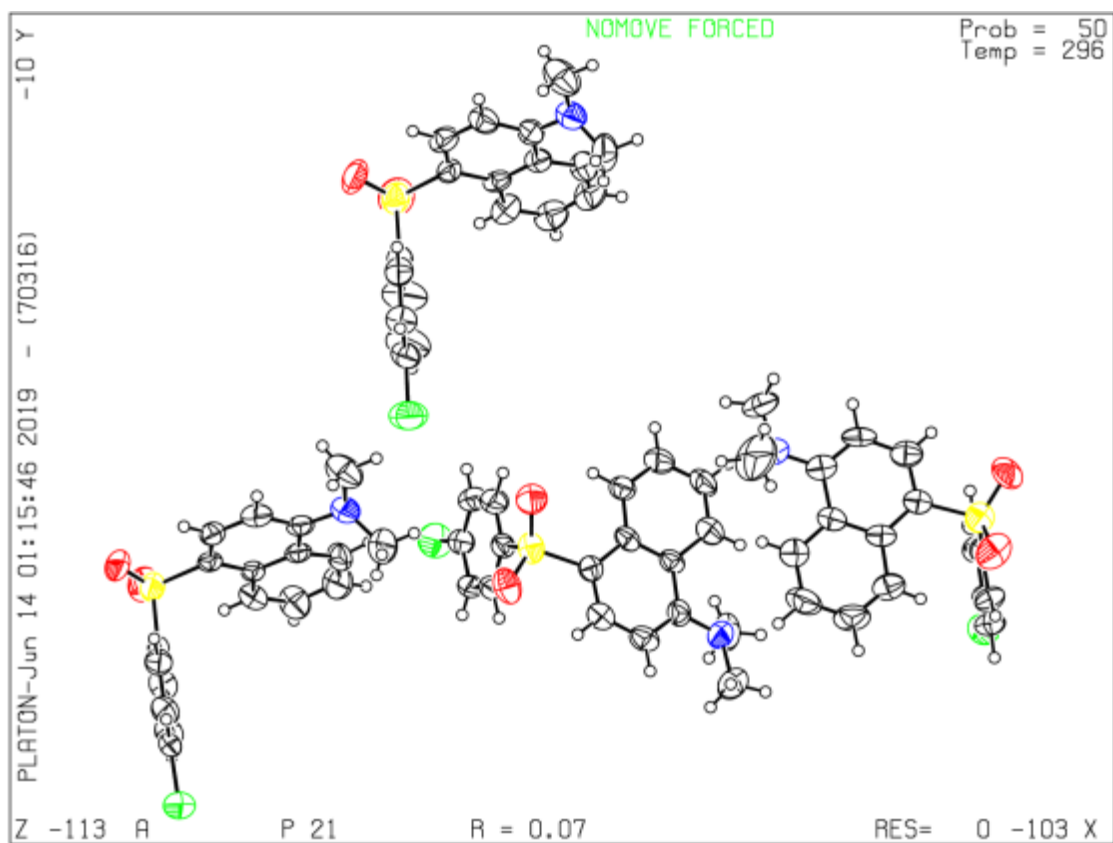

Supplement: c9cc03789f1.pdf [file c9cc03789f1.pdf]
